# Supplementary material
Source: Royal Society of Chemistry journal article supplement (doi:10.1039/d6ew00148c)
Supplement: d6ew00148c2.xlsx [file d6ew00148c2.xlsx]

## Sheet: Table S2
	Table S2. Raw data for reaction progress monitoring of reaction Cl/Cyt=1, pH7 depicted in Figures 1A and S2A and B.
		Absorbance (A.U.)
	Wavelength (nm)	0.1 mM HOCl Control (t=0 h)	0.1 mM Cytosine Control (t=0 h)	0.1 mM HOCl Control (t=20 h)	0.1 mM Cytosine Control (t=20 h)	Sum of Controls	2 m	5 m	10 m	20 m	30 m	1 h	2 h	3 h	18 h	24 h	48 h	72 h
	200	0.04312	2.00896	0.02419	2.00896	2.05208	1.73935	1.68197	1.64833	1.52992	1.52176	1.29889	1.19386	1.17697	1.18642	1.22538	1.20925	1.21277
	201	0.03709	1.88789	0.02184	1.88789	1.92498	1.60262	1.55654	1.51881	1.42345	1.42307	1.21383	1.1201	1.09954	1.11309	1.14117	1.13467	1.13448
	202	0.03386	1.75693	0.01904	1.75693	1.79079	1.47221	1.43806	1.411	1.31581	1.32698	1.13487	1.04701	1.03567	1.04511	1.07434	1.06193	1.06231
	203	0.02994	1.62312	0.01687	1.62312	1.65306	1.3563	1.32368	1.30068	1.22342	1.24147	1.06561	0.98611	0.97624	0.98505	1.01317	1.0019	0.99802
	204	0.0261	1.4946	0.01557	1.4946	1.5207	1.25101	1.22243	1.20612	1.14096	1.15873	1.00468	0.93064	0.92652	0.93412	0.96204	0.94945	0.94659
	205	0.02557	1.39142	0.01438	1.39142	1.41699	1.16877	1.14173	1.12575	1.06951	1.09893	0.95771	0.89502	0.88893	0.89509	0.92397	0.91057	0.9119
	206	0.02154	1.30497	0.01235	1.30497	1.32651	1.1008	1.07863	1.0655	1.01306	1.04876	0.91718	0.86242	0.85889	0.8679	0.89555	0.88351	0.8814
	207	0.0214	1.23474	0.01095	1.23474	1.25614	1.04502	1.02444	1.01186	0.97318	1.0051	0.89105	0.84358	0.83883	0.85171	0.87829	0.86481	0.86219
	208	0.01845	1.18434	0.00742	1.18434	1.20279	1.00039	0.98182	0.97252	0.93562	0.97519	0.8695	0.82924	0.82702	0.8393	0.86959	0.85044	0.85087
	209	0.01695	1.14099	0.00749	1.14099	1.15794	0.9682	0.94933	0.94431	0.91237	0.94916	0.85553	0.82291	0.82225	0.83644	0.85967	0.84532	0.84078
	210	0.01416	1.10654	0.00483	1.10654	1.1207	0.94104	0.92859	0.92025	0.8958	0.93419	0.84815	0.82057	0.81886	0.83155	0.85818	0.84232	0.83744
	211	0.01453	1.07651	0.00429	1.07651	1.09104	0.91953	0.90873	0.9007	0.87882	0.91825	0.83984	0.81746	0.81825	0.83273	0.85841	0.83981	0.8358
	212	0.01198	1.04984	0.00327	1.04984	1.06182	0.90174	0.89098	0.88529	0.86828	0.90558	0.83538	0.81604	0.81869	0.83408	0.85634	0.83687	0.83094
	213	0.01059	1.01947	0.00212	1.01947	1.03006	0.88331	0.87573	0.87001	0.85192	0.89471	0.82852	0.81511	0.81879	0.83308	0.85465	0.83388	0.83332
	214	0.00991	0.98753	0.00048	0.98753	0.99744	0.86654	0.85901	0.85507	0.84101	0.88114	0.82255	0.81368	0.81954	0.83095	0.85415	0.83445	0.827
	215	0.00767	0.95723	0.00068	0.95723	0.9649	0.84832	0.84243	0.84095	0.82765	0.86912	0.81832	0.81332	0.81855	0.83196	0.85037	0.82924	0.82281
	216	0.00717	0.9234	0.00026	0.9234	0.93057	0.83127	0.82776	0.82462	0.81577	0.85807	0.81257	0.81215	0.82046	0.82944	0.84794	0.82501	0.81742
	217	0.00631	0.88742	-0.00157	0.88742	0.89373	0.81349	0.80866	0.80665	0.80198	0.84491	0.80722	0.8081	0.81651	0.8263	0.84358	0.81975	0.81176
	218	0.00626	0.85688	-0.00253	0.85688	0.86314	0.79376	0.79152	0.79207	0.78864	0.83251	0.8011	0.80844	0.81559	0.82083	0.83882	0.81312	0.8046
	219	0.00468	0.82802	-0.00164	0.82802	0.8327	0.77435	0.7734	0.77587	0.77498	0.82195	0.7945	0.80752	0.81458	0.81593	0.83186	0.80779	0.79871
	220	0.00483	0.8014	-0.00212	0.8014	0.80623	0.75658	0.75722	0.76084	0.76409	0.80957	0.78933	0.8049	0.81325	0.81016	0.82325	0.79901	0.7934
	221	0.0044	0.78243	-0.00253	0.78243	0.78683	0.73832	0.74015	0.74424	0.75142	0.7998	0.78544	0.80255	0.8101	0.80383	0.81693	0.79167	0.78241
	222	0.00383	0.76293	-0.00335	0.76293	0.76676	0.72371	0.72645	0.73201	0.74053	0.79087	0.78206	0.80124	0.80797	0.79608	0.81024	0.78304	0.77366
	223	0.00275	0.74606	-0.00314	0.74606	0.74881	0.70954	0.71401	0.72006	0.73016	0.78043	0.77765	0.79528	0.80434	0.787	0.79912	0.77382	0.76514
	224	0.00315	0.72846	-0.00366	0.72846	0.73161	0.69975	0.70593	0.71182	0.72429	0.77508	0.77294	0.79169	0.79872	0.77828	0.7873	0.76328	0.75522
	225	0.00301	0.71368	-0.00263	0.71368	0.71669	0.6915	0.6976	0.70335	0.71642	0.76754	0.76527	0.78645	0.79161	0.7663	0.77533	0.75084	0.74219
	226	0.00326	0.69696	-0.00129	0.69696	0.70022	0.68717	0.69151	0.69843	0.71121	0.75907	0.7591	0.77848	0.78383	0.75338	0.76087	0.73771	0.72907
	227	0.00229	0.67858	-0.00282	0.67858	0.68087	0.68088	0.68761	0.69384	0.70651	0.75137	0.75146	0.76909	0.77321	0.73803	0.74561	0.72131	0.71339
	228	0.00363	0.66059	-0.00285	0.66059	0.66422	0.67972	0.68396	0.69122	0.7035	0.74583	0.74355	0.75948	0.76236	0.72264	0.72801	0.70629	0.6993
	229	0.00314	0.64322	-0.00243	0.64322	0.64636	0.67625	0.6816	0.68788	0.69837	0.73764	0.7342	0.748	0.74868	0.70598	0.71045	0.68916	0.68201
	230	0.00278	0.62414	-0.00225	0.62414	0.62692	0.67385	0.67851	0.68382	0.69337	0.72814	0.72449	0.73281	0.73371	0.68783	0.6922	0.67157	0.66434
	231	0.00209	0.60594	-0.0026	0.60594	0.60803	0.67146	0.67659	0.68023	0.6872	0.71969	0.71132	0.71788	0.71736	0.67018	0.67287	0.65227	0.64557
	232	0.00303	0.58684	-0.00265	0.58684	0.58987	0.66975	0.67414	0.67726	0.68317	0.7112	0.70025	0.70217	0.70157	0.65081	0.65217	0.63269	0.62805
	233	0.00283	0.57104	-0.00173	0.57104	0.57387	0.66776	0.67036	0.67362	0.67861	0.70115	0.68693	0.6848	0.68198	0.6312	0.63246	0.61371	0.60815
	234	0.00218	0.5561	-0.00172	0.5561	0.55828	0.66528	0.66671	0.66884	0.6712	0.69153	0.67393	0.6675	0.66291	0.61129	0.61146	0.59466	0.59144
	235	0.00317	0.53903	-0.00155	0.53903	0.5422	0.66117	0.66153	0.66511	0.66487	0.68132	0.66118	0.65168	0.64564	0.59249	0.59186	0.57431	0.57038
	236	0.00315	0.52219	-0.00176	0.52219	0.52534	0.65739	0.65707	0.65937	0.65797	0.67095	0.64684	0.63291	0.62613	0.5711	0.57177	0.55581	0.5521
	237	0.0025	0.5083	-0.00111	0.5083	0.5108	0.65337	0.65211	0.65334	0.64931	0.66006	0.63322	0.61491	0.60754	0.55234	0.5518	0.53667	0.53301
	238	0.0027	0.49285	-0.00135	0.49285	0.49555	0.64628	0.64621	0.64731	0.64285	0.64838	0.61886	0.59808	0.58917	0.53257	0.53163	0.51764	0.51458
	239	0.00362	0.47979	-0.00071	0.47979	0.48341	0.63969	0.63993	0.64025	0.6332	0.63506	0.60356	0.57934	0.56894	0.51308	0.51301	0.49837	0.49625
	240	0.00348	0.46615	-0.00058	0.46615	0.46963	0.63394	0.63293	0.63132	0.62396	0.62563	0.59031	0.56251	0.55052	0.49467	0.49488	0.48195	0.47872
	241	0.0037	0.45459	-0.00039	0.45459	0.45829	0.62656	0.62461	0.62505	0.61634	0.61443	0.57706	0.54691	0.53463	0.4782	0.4786	0.46654	0.46368
	242	0.00368	0.44357	-0.00148	0.44357	0.44725	0.61951	0.61709	0.616	0.60578	0.60311	0.56502	0.53221	0.51847	0.46369	0.46312	0.45093	0.4499
	243	0.00392	0.43437	1e-05	0.43437	0.43829	0.61051	0.609	0.60853	0.59868	0.59433	0.55369	0.51963	0.50547	0.44917	0.45062	0.43949	0.43752
	244	0.0042	0.42895	0.00099	0.42895	0.43315	0.60427	0.60231	0.60128	0.59177	0.5862	0.54624	0.50955	0.49375	0.44037	0.44	0.42866	0.42791
	245	0.00453	0.4233	-0.00018	0.4233	0.42783	0.59501	0.59256	0.59252	0.58328	0.5774	0.53706	0.50117	0.48399	0.43105	0.43237	0.42169	0.42101
	246	0.00502	0.42056	0.00067	0.42056	0.42558	0.58841	0.5862	0.58526	0.57628	0.57111	0.53181	0.49445	0.47726	0.42526	0.42794	0.41605	0.41533
	247	0.00524	0.42022	0.00043	0.42022	0.42546	0.5804	0.5806	0.58003	0.5713	0.56521	0.52785	0.49053	0.47285	0.42163	0.4243	0.41448	0.41333
	248	0.00486	0.4213	0.00221	0.4213	0.42616	0.57503	0.57309	0.57328	0.56637	0.56044	0.52476	0.48716	0.46982	0.42013	0.42173	0.413	0.41243
	249	0.00499	0.42337	0.00179	0.42337	0.42836	0.5697	0.56857	0.57031	0.56185	0.55938	0.52396	0.48704	0.46899	0.41979	0.42299	0.41387	0.41247
	250	0.00595	0.42924	0.00247	0.42924	0.43519	0.56574	0.56597	0.56667	0.55982	0.55733	0.52418	0.48931	0.46977	0.42176	0.42439	0.41587	0.41529
	251	0.00621	0.43718	0.00349	0.43718	0.44339	0.56315	0.56266	0.56395	0.55832	0.55627	0.52542	0.49297	0.47292	0.42574	0.42987	0.41968	0.42033
	252	0.00627	0.44717	0.00413	0.44717	0.45344	0.5607	0.56124	0.56294	0.55847	0.55862	0.52923	0.49651	0.47713	0.43043	0.43581	0.4266	0.42586
	253	0.00761	0.45901	0.00416	0.45901	0.46662	0.55984	0.56028	0.56295	0.55937	0.56081	0.5333	0.50315	0.48351	0.43826	0.44414	0.43379	0.43467
	254	0.00852	0.47182	0.00463	0.47182	0.48034	0.55954	0.56127	0.56324	0.55978	0.56371	0.5389	0.50964	0.49069	0.4471	0.4519	0.4417	0.44393
	255	0.0086	0.48613	0.0055	0.48613	0.49473	0.56165	0.56242	0.5647	0.56437	0.56822	0.54601	0.51903	0.50068	0.45702	0.46184	0.45387	0.45379
	256	0.00902	0.50199	0.00565	0.50199	0.51101	0.56361	0.56439	0.56708	0.56687	0.57378	0.55324	0.5285	0.50978	0.46767	0.47369	0.46515	0.4648
	257	0.00958	0.51813	0.00543	0.51813	0.52771	0.56835	0.56935	0.57155	0.57246	0.5811	0.5634	0.54057	0.52129	0.47948	0.48679	0.47783	0.47637
	258	0.0105	0.53688	0.00846	0.53688	0.54738	0.57196	0.5734	0.57595	0.57805	0.58705	0.57248	0.55137	0.53378	0.49283	0.49909	0.48971	0.49006
	259	0.01094	0.55133	0.00884	0.55133	0.56227	0.5774	0.57955	0.5812	0.58333	0.59436	0.58148	0.56245	0.54426	0.50341	0.51142	0.50278	0.50329
	260	0.01164	0.56559	0.0094	0.56559	0.57723	0.58424	0.58551	0.58828	0.58887	0.60098	0.58973	0.57327	0.5557	0.51552	0.52357	0.51498	0.51589
	261	0.01338	0.57967	0.00927	0.57967	0.59305	0.591	0.59116	0.59451	0.59459	0.60805	0.59803	0.58361	0.56653	0.52749	0.53621	0.52761	0.52862
	262	0.01324	0.59244	0.01051	0.59244	0.60568	0.59922	0.59973	0.60136	0.60169	0.61549	0.60755	0.595	0.57727	0.53971	0.54718	0.53989	0.54101
	263	0.0145	0.60369	0.01123	0.60369	0.61819	0.60726	0.60841	0.60949	0.6081	0.6212	0.61665	0.60439	0.58769	0.55121	0.55853	0.5512	0.55166
	264	0.01616	0.61264	0.01306	0.61264	0.6288	0.61564	0.61527	0.6161	0.61471	0.62858	0.62405	0.61224	0.596	0.56045	0.56747	0.56188	0.56169
	265	0.01623	0.61695	0.0135	0.61695	0.63318	0.62445	0.62306	0.62281	0.62211	0.63352	0.63023	0.62025	0.60406	0.56893	0.57618	0.56925	0.5691
	266	0.01856	0.62021	0.01546	0.62021	0.63877	0.6321	0.62961	0.62861	0.62601	0.63748	0.63378	0.6253	0.60964	0.57644	0.58433	0.57761	0.57846
	267	0.01926	0.62141	0.01607	0.62141	0.64067	0.63974	0.63785	0.63587	0.63088	0.64124	0.63744	0.62945	0.6151	0.58359	0.59063	0.58383	0.58426
	268	0.01991	0.61823	0.01605	0.61823	0.63814	0.64625	0.64261	0.64084	0.63528	0.64245	0.63964	0.63275	0.61919	0.58694	0.59551	0.58875	0.5891
	269	0.02093	0.61153	0.01893	0.61153	0.63246	0.65171	0.64734	0.64457	0.63644	0.64161	0.63889	0.63329	0.62018	0.58986	0.59863	0.58999	0.5922
	270	0.02133	0.5982	0.0192	0.5982	0.61953	0.6545	0.6484	0.64649	0.63616	0.64	0.63586	0.63149	0.61865	0.5903	0.59949	0.59154	0.59293
	271	0.02358	0.58157	0.02017	0.58157	0.60515	0.65657	0.6495	0.64637	0.63483	0.63581	0.63198	0.62719	0.61424	0.58946	0.59618	0.59008	0.59102
	272	0.02423	0.5615	0.02164	0.5615	0.58573	0.65789	0.64975	0.64605	0.63149	0.63024	0.62589	0.62183	0.61006	0.58575	0.59304	0.58699	0.58704
	273	0.02517	0.54139	0.02251	0.54139	0.56656	0.65617	0.64786	0.64368	0.62668	0.62368	0.61756	0.61337	0.60294	0.58056	0.58944	0.58228	0.58332
	274	0.02636	0.51667	0.0237	0.51667	0.54303	0.65386	0.64418	0.63829	0.62092	0.6148	0.60827	0.60423	0.59373	0.57479	0.58393	0.57577	0.57697
	275	0.02661	0.48858	0.02549	0.48858	0.51519	0.64878	0.63845	0.632	0.61264	0.60307	0.59632	0.59242	0.5829	0.56587	0.57408	0.5677	0.56748
	276	0.02861	0.45555	0.02599	0.45555	0.48416	0.6436	0.6327	0.62513	0.60384	0.5914	0.58444	0.58037	0.57267	0.55572	0.56396	0.55719	0.55761
	277	0.02923	0.42151	0.02753	0.42151	0.45074	0.6359	0.6228	0.61621	0.59288	0.577	0.56895	0.56626	0.55849	0.54429	0.5494	0.54536	0.54719
	278	0.03016	0.38804	0.02846	0.38804	0.4182	0.62403	0.61169	0.60493	0.5795	0.56113	0.55207	0.54882	0.54237	0.53211	0.53801	0.53378	0.53331
	279	0.03164	0.35535	0.02857	0.35535	0.38699	0.61308	0.59975	0.59312	0.56704	0.54558	0.53507	0.53302	0.52844	0.51784	0.52455	0.51899	0.51978
	280	0.03234	0.32373	0.02982	0.32373	0.35607	0.59698	0.58477	0.57713	0.54894	0.52702	0.51767	0.51449	0.51064	0.50333	0.50944	0.50593	0.50569
	281	0.03279	0.29021	0.0302	0.29021	0.323	0.58146	0.56952	0.56007	0.5337	0.5086	0.49911	0.49713	0.49406	0.48793	0.49335	0.48995	0.49193
	282	0.03458	0.2533	0.03114	0.2533	0.28788	0.56247	0.54909	0.54177	0.51373	0.48716	0.47803	0.47616	0.47395	0.4704	0.47679	0.47194	0.4729
	283	0.03403	0.21556	0.03256	0.21556	0.24959	0.5406	0.52955	0.52129	0.49317	0.46451	0.45572	0.45459	0.45392	0.45125	0.45744	0.45348	0.45327
	284	0.03464	0.17832	0.03295	0.17832	0.21296	0.5197	0.50792	0.4985	0.47134	0.44108	0.43219	0.43234	0.43165	0.43235	0.43807	0.43593	0.43375
	285	0.03671	0.14415	0.03364	0.14415	0.18086	0.49643	0.48462	0.47677	0.44889	0.41879	0.41023	0.40976	0.41092	0.41156	0.41814	0.41407	0.41564
	286	0.0363	0.11388	0.03429	0.11388	0.15018	0.47104	0.46021	0.45258	0.42626	0.39502	0.38755	0.38831	0.39	0.39309	0.39935	0.39444	0.3941
	287	0.03682	0.08844	0.0342	0.08844	0.12526	0.44448	0.43482	0.42809	0.40298	0.37264	0.36733	0.36859	0.37046	0.37467	0.38032	0.37736	0.37773
	288	0.03699	0.06911	0.03472	0.06911	0.1061	0.41843	0.40878	0.40232	0.37988	0.35137	0.34613	0.34919	0.35115	0.35751	0.36407	0.3594	0.35991
	289	0.0374	0.05249	0.03526	0.05249	0.08989	0.38989	0.38206	0.3767	0.35552	0.32944	0.32577	0.32966	0.3328	0.34077	0.34488	0.3431	0.34231
	290	0.03769	0.04114	0.03482	0.04114	0.07883	0.36217	0.35633	0.35187	0.33247	0.30883	0.3067	0.31152	0.3146	0.32321	0.32898	0.32516	0.32516
	291	0.03753	0.03242	0.03526	0.03242	0.06995	0.33582	0.33009	0.32667	0.30911	0.28842	0.28794	0.29534	0.29794	0.30694	0.3117	0.3085	0.30811
	292	0.03763	0.02458	0.03448	0.02458	0.06221	0.30657	0.30265	0.30015	0.28595	0.26789	0.27054	0.27647	0.28185	0.28955	0.29427	0.29176	0.29066
	293	0.03709	0.01924	0.03575	0.01924	0.05633	0.27524	0.27247	0.27124	0.26019	0.24616	0.25033	0.25844	0.26356	0.27311	0.27727	0.27354	0.27391
	294	0.0378	0.01529	0.03595	0.01529	0.05309	0.24525	0.24368	0.24402	0.23686	0.2273	0.23403	0.24414	0.2482	0.25765	0.26058	0.25867	0.25791
	295	0.03687	0.01129	0.03427	0.01129	0.04816	0.2129	0.21434	0.21552	0.21242	0.20518	0.21526	0.22685	0.23144	0.24251	0.24677	0.2436	0.24333
	296	0.03666	0.00838	0.03399	0.00838	0.04504	0.18537	0.18653	0.18926	0.18941	0.18642	0.19825	0.21124	0.2158	0.2263	0.23006	0.22743	0.22681
	297	0.0361	0.00667	0.03407	0.00667	0.04277	0.16043	0.16246	0.16581	0.16815	0.16874	0.18186	0.19636	0.2012	0.21216	0.21516	0.21187	0.21295
	298	0.03647	0.00547	0.03449	0.00547	0.04194	0.13716	0.14126	0.14453	0.14917	0.15243	0.16748	0.18214	0.18688	0.1967	0.19985	0.19678	0.19734
	299	0.03545	0.00434	0.03397	0.00434	0.03979	0.11842	0.1222	0.12697	0.13308	0.13795	0.15364	0.16864	0.17419	0.183	0.18543	0.18267	0.18418
	300	0.03536	0.00393	0.03367	0.00393	0.03929	0.1017	0.10659	0.11137	0.11918	0.12466	0.14134	0.15595	0.16103	0.16957	0.1717	0.17107	0.17092
	301	0.03378	0.00213	0.03281	0.00213	0.03591	0.08787	0.09307	0.09857	0.10702	0.11411	0.13066	0.14458	0.14853	0.15721	0.16074	0.15809	0.15793
	302	0.03442	0.00278	0.03151	0.00278	0.0372	0.07697	0.08276	0.08806	0.09644	0.10494	0.12086	0.13413	0.13863	0.14526	0.14728	0.1472	0.14656
	303	0.03356	0.00109	0.03113	0.00109	0.03465	0.06849	0.0737	0.0794	0.08811	0.09682	0.1113	0.12338	0.12737	0.13339	0.13679	0.1343	0.13421
	304	0.03332	0.00168	0.03005	0.00168	0.035	0.05888	0.06481	0.06941	0.0793	0.08763	0.09994	0.11092	0.11476	0.12196	0.12463	0.12286	0.12284
	305	0.03197	0.00136	0.03	0.00136	0.03333	0.05364	0.05927	0.0627	0.07102	0.0792	0.09123	0.10035	0.10442	0.11018	0.11088	0.11017	0.10982
	306	0.03142	0.00138	0.02917	0.00138	0.0328	0.04773	0.0522	0.05635	0.06377	0.07255	0.08272	0.08962	0.09275	0.09868	0.10181	0.09944	0.09929
	307	0.0305	0.00134	0.02774	0.00134	0.03184	0.04168	0.0468	0.05118	0.05792	0.06507	0.07336	0.08035	0.08331	0.08907	0.0905	0.08916	0.08839
	308	0.02953	0.00195	0.0277	0.00195	0.03148	0.0401	0.04383	0.04676	0.05288	0.06012	0.06702	0.07324	0.07638	0.07899	0.08174	0.08003	0.0781
	309	0.02945	0.00138	0.0265	0.00138	0.03083	0.03385	0.0376	0.0418	0.04671	0.05329	0.05932	0.06436	0.06663	0.07126	0.07392	0.07053	0.07267
	310	0.02645	-0.0001	0.02472	-0.0001	0.02635	0.03149	0.03441	0.03848	0.04312	0.04881	0.05382	0.05685	0.05975	0.06385	0.06478	0.06378	0.06354
	311	0.02622	0.00055	0.02315	0.00055	0.02677	0.02794	0.03163	0.03491	0.03921	0.04441	0.04829	0.05254	0.0544	0.05678	0.05839	0.0571	0.05797
	312	0.02585	0.00101	0.02506	0.00101	0.02686	0.02532	0.02786	0.03143	0.03496	0.04063	0.04331	0.04572	0.04779	0.05104	0.0515	0.05113	0.05217
	313	0.02425	0.00043	0.02291	0.00043	0.02468	0.02365	0.02563	0.02998	0.03342	0.03775	0.03889	0.04142	0.04296	0.045	0.04788	0.04514	0.04465
	314	0.02356	0.0009	0.02218	0.0009	0.02446	0.02122	0.02292	0.02595	0.02953	0.03352	0.03416	0.03607	0.03676	0.03981	0.04072	0.03829	0.04031
	315	0.02346	-3e-05	0.02065	-3e-05	0.02343	0.0194	0.02236	0.02455	0.02567	0.0305	0.03145	0.03152	0.03299	0.03443	0.03713	0.03348	0.03517
	316	0.02243	0.00016	0.01907	0.00016	0.02259	0.01768	0.01913	0.02063	0.02371	0.02747	0.0268	0.02759	0.02808	0.02921	0.03219	0.02959	0.02975
	317	0.02101	-7e-05	0.01889	-7e-05	0.02094	0.01677	0.01764	0.02006	0.02198	0.02528	0.02467	0.02404	0.02545	0.02635	0.02774	0.02674	0.02649
	318	0.01979	0.00022	0.01786	0.00022	0.02001	0.01543	0.01652	0.01783	0.02021	0.02424	0.02255	0.02147	0.0226	0.02308	0.02478	0.02347	0.02295
	319	0.01898	0.00011	0.01712	0.00011	0.01909	0.01482	0.01559	0.01742	0.01801	0.0222	0.02069	0.01929	0.0205	0.02008	0.02246	0.02	0.0209
	320	0.01789	-0.00041	0.0166	-0.00041	0.01748	0.01308	0.01474	0.01664	0.01748	0.0209	0.01913	0.01773	0.01784	0.01824	0.02041	0.01802	0.01829
	321	0.01657	-0.00043	0.01462	-0.00043	0.01614	0.01253	0.01345	0.01409	0.01579	0.01897	0.01635	0.0162	0.01582	0.01607	0.01806	0.01628	0.01631
	322	0.01595	7e-05	0.0143	7e-05	0.01602	0.01133	0.01227	0.01321	0.01438	0.01719	0.01549	0.01276	0.01334	0.01419	0.0165	0.01515	0.01503
	323	0.01565	-0.00088	0.0133	-0.00088	0.01477	0.01026	0.0111	0.01184	0.01299	0.01573	0.01341	0.01221	0.01234	0.01269	0.01395	0.01271	0.01276
	324	0.01402	-0.00063	0.01294	-0.00063	0.01339	0.01045	0.01019	0.01203	0.01317	0.01534	0.01236	0.01159	0.01145	0.01179	0.0134	0.0114	0.01058
	325	0.01354	0.00068	0.01273	0.00068	0.01422	0.00867	0.00887	0.01038	0.01096	0.01349	0.01102	0.00955	0.00937	0.01006	0.01168	0.00922	0.00955
	326	0.01271	0.00038	0.01114	0.00038	0.01309	0.00946	0.00931	0.0102	0.01044	0.01289	0.01024	0.00853	0.01005	0.00877	0.0115	0.00918	0.00868
	327	0.01262	-0.00035	0.01106	-0.00035	0.01227	0.00804	0.00839	0.00999	0.00875	0.01156	0.00894	0.00818	0.00831	0.00782	0.00872	0.00709	0.00682
	328	0.0106	0.00049	0.01152	0.00049	0.01109	0.00745	0.00689	0.00877	0.00789	0.01058	0.00717	0.0069	0.0071	0.00716	0.00807	0.00707	0.00665
	329	0.00993	0.0007	0.00977	0.0007	0.01063	0.00665	0.00581	0.00749	0.00804	0.00932	0.00741	0.00644	0.00529	0.00689	0.0086	0.00682	0.00579
	330	0.01072	0.00031	0.00967	0.00031	0.01103	0.006	0.00639	0.00779	0.0075	0.0096	0.0066	0.0056	0.00549	0.00601	0.00662	0.00603	0.0054
	331	0.01062	0.0008	0.00828	0.0008	0.01142	0.00513	0.0047	0.00627	0.00532	0.00777	0.00617	0.00411	0.00553	0.00575	0.00574	0.00575	0.00543
	332	0.00816	0.00059	0.00862	0.00059	0.00875	0.00655	0.00628	0.00679	0.00615	0.00818	0.00602	0.00458	0.00477	0.00501	0.00595	0.00404	0.00536
	333	0.00805	0.00092	0.0079	0.00092	0.00897	0.0048	0.00483	0.00494	0.00395	0.00674	0.00418	0.00359	0.0039	0.00374	0.00504	0.0039	0.00463
	334	0.00854	-0.00016	0.00506	-0.00016	0.00838	0.0038	0.00459	0.00523	0.00414	0.00682	0.00404	0.00269	0.00319	0.00345	0.00467	0.00309	0.00359
	335	0.00757	-6e-05	0.0062	-6e-05	0.00751	0.00418	0.00308	0.00367	0.00336	0.00642	0.00416	0.00353	0.00281	0.00322	0.00515	0.00404	0.00235
	336	0.0078	0.00024	0.00507	0.00024	0.00804	0.00374	0.00344	0.00487	0.00367	0.0059	0.00368	0.00242	0.00237	0.0024	0.00412	0.00248	0.00397
	337	0.00515	0.00079	0.00496	0.00079	0.00594	0.00429	0.0035	0.004	0.00248	0.00541	0.00288	0.00189	0.00169	0.00231	0.00432	0.00333	0.003
	338	0.00602	0.00102	0.00431	0.00102	0.00704	0.0037	0.00393	0.0037	0.00334	0.00492	0.003	0.00185	0.00264	0.00304	0.004	0.00244	0.00247
	339	0.00491	0.0016	0.00541	0.0016	0.00651	0.00295	0.00246	0.00264	0.00172	0.00485	0.00192	0.00115	0.00073	0.00159	0.00324	0.00176	0.00165
	340	0.00553	-0.00018	0.00264	-0.00018	0.00535	0.00352	0.00247	0.00412	0.0039	0.00573	0.00273	0.00105	0.00233	0.00249	0.00261	0.00133	0.00153
	341	0.00594	0.00076	0.0043	0.00076	0.0067	0.00387	0.00282	0.00335	0.00264	0.00519	0.00305	0.00136	0.00088	0.00232	0.00281	0.0016	0.00255
	342	0.00548	0.00091	0.00379	0.00091	0.00639	0.00293	0.00328	0.00355	0.00321	0.00421	0.00186	0.00041	0.00116	0.00183	0.00261	0.00083	0.00092
	343	0.00429	0.00203	0.00358	0.00203	0.00632	0.00283	0.00187	0.00372	0.00161	0.00411	0.00166	0.00075	0.00026	0.0004	0.00166	0.00136	0.00197
	344	0.00326	0.0002	0.00154	0.0002	0.00346	0.00278	0.00279	0.00305	0.00216	0.00419	0.00191	0.00059	0.00071	0.00107	0.00126	0.00079	0.00167
	345	0.00486	0.0005	0.00286	0.0005	0.00536	0.00205	0.00197	0.00262	0.00145	0.00431	0.00211	0.00041	0.00058	0.00095	0.00409	0.00111	0.00055
	346	0.00317	0.00095	0.00114	0.00095	0.00412	0.00253	0.00205	0.00319	0.00116	0.00454	0.0017	0.00125	0.0006	0.00084	0.00422	-0.00109	0.00011
	347	0.00294	0.00096	0.00322	0.00096	0.0039	0.00205	0.00164	0.00166	0.00115	0.00327	0.00102	0.00028	-0.00019	0.00156	0.00256	2e-05	0.00079
	348	0.00284	0.00151	0.0033	0.00151	0.00435	0.00264	0.00149	0.00188	0.00132	0.00368	0.00029	-9e-05	-0.00011	0.00054	0.00356	0.00095	0.00169
	349	0.00324	0.00106	0.00159	0.00106	0.0043	0.00209	0.00183	0.00201	0.00173	0.00302	0.00213	0.00019	-0.00025	0.00085	0.00275	0.00038	0.00127
	350	0.00264	0.00072	0.0026	0.00072	0.00336	0.00257	0.00196	0.00249	0.00167	0.0027	0.00067	0.00122	0.00025	0.00131	0.00255	0.00045	0.00172
	351	0.00117	0.00075	0.00122	0.00075	0.00192	0.00206	0.00105	0.00204	0.00105	0.00251	0.00084	8e-05	-0.00026	0.00079	0.00251	0.00124	0.00154
	352	0.00152	0.00137	0.00298	0.00137	0.00289	0.00267	0.00201	0.00204	0.00204	0.00258	0.00094	0.00086	0.00076	0.0005	0.00269	0.00128	0.00239
	353	0.00212	0.0025	0.00145	0.0025	0.00462	0.00134	0.00096	0.00117	0.00082	0.00214	0.00163	0.00084	-0.00016	0.00087	0.00275	-0.00019	0.00231
	354	0.00164	0.00028	0.00142	0.00028	0.00192	0.00264	0.002	0.00245	0.00089	0.00324	0.00181	0.00155	0.00059	0.0002	0.00322	0.00062	0.00089
	355	0.00209	0.00227	0.00153	0.00227	0.00436	0.00172	0.00328	0.00278	0.00179	0.00302	0.00139	0.00077	0.0011	0.00109	0.00192	0.00105	-0.00011
	356	0.00184	0.00013	-0.0005	0.00013	0.00197	0.00204	0.00095	0.00133	0.00146	0.00241	0.00123	0.00074	0.00094	0.00138	0.00294	0.0009	0.00067
	357	0.00122	0.00096	0.00081	0.00096	0.00218	0.00122	0.00102	0.00164	0.00025	0.00221	4e-05	-0.00035	0.00015	0.0009	0.00124	0.00024	0.0009
	358	0.00112	0.0007	0.00049	0.0007	0.00182	0.00222	0.00161	0.00146	0.00065	0.0026	0.00118	0.00036	-0.00129	0.00125	0.00209	0.00102	0.00095
	359	0.00142	0.00099	0.00017	0.00099	0.00241	0.0005	0.0003	0.00165	0.00064	0.00159	-0.00033	-0.00028	-0.00046	0	0.00215	3e-05	-5e-05
	360	0.00117	0.00051	0.00029	0.00051	0.00168	-7e-05	0.00094	0.00089	0.00034	0.00063	-0.0003	-0.0014	-0.00038	0.00056	0.00165	-0.00013	0.00079
	361	-2e-05	0.00037	0.00032	0.00037	0.00035	0.00089	0.00046	0.00113	0.00092	0.00119	-0.00018	-0.00053	-0.00077	0.00262	0.00083	0.00041	0.00108
	362	6e-05	-0.00075	-0.00024	-0.00075	-0.00069	0.00172	0.00142	0.00236	0.00054	0.00206	0.00198	0.0008	0.00022	0.0007	0.00313	-0.00046	-0.00029
	363	0.00074	8e-05	0.00142	8e-05	0.00082	0.00084	-2e-05	0.0013	0.00028	0.00147	0.00064	0.00034	-0.00084	0.00081	0.00172	0.00026	0.00014
	364	0.00109	-0.00085	0.00011	-0.00085	0.00024	0.00089	0.00055	0.00077	8e-05	0.00153	0.00091	-0.00027	-0.00106	-0.00022	0.00093	0.0001	0.00032
	365	0.00141	-0.00023	0	-0.00023	0.00118	0.00072	0.0007	0.00065	0.00109	0.00154	-0.00079	-0.00052	-0.00098	0.00077	0.0025	0.00074	-0.00016
	366	-0.00017	-0.00097	0.0001	-0.00097	-0.00114	0.00076	0.00021	0.0012	0.00053	0.00047	0.00038	-0.00062	-0.00055	0.00086	0.00095	-0.00012	-0.00022
	367	0.00072	0.00068	0.00036	0.00068	0.0014	0.0015	0.00163	0.00178	0.00147	0.00153	0.00033	0.00054	0.00117	0.00019	0.00048	0.00052	-0.00039
	368	0.00064	-0.00119	-0.00129	-0.00119	-0.00055	0.0002	0.00055	0.00066	0.00053	0.0004	0.00085	-0.00038	-6e-05	0.00144	0.00157	1e-05	-0.00051
	369	-0.00029	-0.00041	-0.00016	-0.00041	-0.0007	0.00057	-0.00079	-2e-05	-0.00059	0.00082	-0.0004	-0.0004	-0.00085	0.00049	0.00095	0.00019	0.00114
	370	-0.00014	-0.00033	-0.00019	-0.00033	-0.00047	0.0005	-0.00035	0.0001	0.00078	0.00065	-0.00021	-0.00068	-0.00075	-0.00024	0.00101	-3e-05	2e-05
	371	0.00132	0.00028	3e-05	0.00028	0.0016	0.0007	-1e-05	0.00136	-0.00044	0.00148	0.00084	-0.00037	-0.00015	-0.00113	0.00019	2e-05	-2e-05
	372	0.00076	-0.00149	-0.00029	-0.00149	-0.00073	0.00081	0.00015	1e-05	-0.00109	0.0005	-0.00043	-0.0009	-0.00051	0.00047	0.00211	0.00169	0.00062
	373	0.00088	-0.00089	0.00081	-0.00089	-1e-05	0.0002	-0.0002	2e-05	-0.00022	0.00065	-9e-05	-0.00011	-0.00056	-0.00051	0.00185	0.0001	0.0004
	374	0.00073	-0.00012	-0.00066	-0.00012	0.00061	-0.00049	-8e-05	-0.00041	-0.00072	0.0004	-0.00011	-0.0012	-0.00079	0.00016	0.00152	-0.00025	0.00028
	375	0.00073	-7e-05	3e-05	-7e-05	0.00066	0.00084	7e-05	0.00068	-0.00021	0.00063	0.00015	9e-05	0.0001	0.00039	0.00189	0.00045	0.00042
	376	0.0007	-0.00036	-0.00025	-0.00036	0.00034	0.00055	0.00068	0.00101	-0.0006	0.00068	0.00029	-0.0006	-1e-05	0.00044	0.00053	-0.00131	0.00039
	377	0.00017	-0.00018	-0.0007	-0.00018	-1e-05	0.00088	0.00029	-0.00011	0.00052	0.0006	-0.00027	-0.00091	-0.00045	0.0005	0.00145	0.00012	-0.00095
	378	0.00036	0.00065	-0.00055	0.00065	0.00101	-0.00079	-0.00058	-0.00079	-0.00136	0.00049	-0.00065	-0.00118	-0.00194	-0.00024	0.00139	-0.00019	-0.00034
	379	0.0002	-0.00111	-1e-05	-0.00111	-0.00091	0.00025	-0.00075	-0.00019	-0.0012	-0.00036	-0.00025	-0.00097	-0.00147	0.00126	0.00117	-0.00086	-0.00067
	380	-3e-05	0.00025	0.00019	0.00025	0.00022	0.00055	0.00095	0.00032	0.00056	0.00069	0	0.00045	-0.00049	0.00041	0.00101	-5e-05	-0.00031
	381	0.00184	-0.0006	-8e-05	-0.0006	0.00124	-0.00015	-0.00053	0.0001	-0.00122	-0.00012	1e-05	-0.00124	0.00021	0.00111	0.00159	-0.00022	-1e-05
	382	0.00043	-0.00059	-0.00074	-0.00059	-0.00016	8e-05	0.00031	-0.00068	-3e-05	5e-05	0.00038	-0.00027	-0.00024	0.00114	0.00147	-0.00076	-0.00012
	383	0.00018	-0.00011	-0.00082	-0.00011	7e-05	0.00045	0.0003	-0.00011	-0.00038	-0.00073	-0.00012	-0.00073	-0.0008	0.00156	0.00176	-0.00162	-0.00086
	384	0.00043	-0.00032	-0.00099	-0.00032	0.00011	-0.00039	-0.00062	0.00047	0.00034	0.00082	0.00015	0.00078	0.00019	0.00166	0.00185	-7e-05	-0.00027
	385	-0.00072	-0.00089	-0.00151	-0.00089	-0.00161	-0.00072	-0.00028	0.00052	-0.00033	-7e-05	-0.00059	-0.00036	-0.00118	0.00133	0.00057	0.00024	-0.00042
	386	-0.0008	-0.0012	3e-05	-0.0012	-0.002	0.00031	3e-05	-4e-05	-0.00014	0.00021	-0.00071	-0.00046	-0.00053	0.00117	0.00207	-0.00079	-0.00052
	387	0.00013	0.00024	-1e-05	0.00024	0.00037	-0.00033	0.00017	0.00022	-0.00017	0.00019	-0.00043	-4e-05	-0.00044	0.00098	0.00071	0.0007	-0.00051
	388	-0.00121	0.0009	-0.0001	0.0009	-0.00031	-0.00045	0.00032	0.00019	-0.00028	0.00032	0.00024	0.0004	0.00045	0.00035	0.00183	0.00088	-5e-05
	389	0.00053	0	-9e-05	0	0.00053	-8e-05	-0.00036	0.00014	-0.00082	-0.00052	-0.00065	-0.00093	-4e-05	7e-05	0.00082	-0.00048	0.0002
	390	-0.00025	-0.00041	-0.00054	-0.00041	-0.00066	-0.00058	0.00044	-0.00058	-0.00094	-5e-05	-0.00077	-0.00114	-0.00137	0.00072	0.00064	-0.00081	0.00062
	391	0.00031	-0.00044	-0.00063	-0.00044	-0.00013	-0.0008	-0.00067	-0.0005	-0.00075	-0.00085	-0.00032	-0.00127	-0.00096	0.00149	0.00113	0.00051	0.00014
	392	-0.00021	0.0006	0.00065	0.0006	0.00039	-9e-05	8e-05	0.00035	-0.00063	-0.0004	-0.00044	-0.00056	6e-05	0.00105	0.00075	0.0003	-0.00023
	393	-3e-05	-0.00146	-0.00111	-0.00146	-0.00149	-5e-05	-0.00063	-0.00068	-0.00032	-2e-05	-0.00024	-0.00086	-0.00013	-0.00015	0.00068	-0.00125	-8e-05
	394	0.00157	4e-05	-8e-05	4e-05	0.00161	-0.00025	-0.00038	-0.0002	-0.00058	-0.00065	-0.00085	-0.00128	-0.00056	0.00116	0.00099	-4e-05	0.00033
	395	-0.00026	-0.00187	-0.00197	-0.00187	-0.00213	8e-05	3e-05	0.00013	-0.00012	0.00047	-0.00036	0.0006	-0.00052	0.00087	0.00093	-0.00073	0.00126
	396	0.00043	-0.00044	0.00036	-0.00044	-1e-05	0.0009	0.00124	0.00106	9e-05	0.00045	0.00029	-0.00026	-0.00083	0.0011	0.00104	0.00064	-0.0001
	397	0.00132	-0.001	-3e-05	-0.001	0.00032	-1e-05	-8e-05	0.0003	-0.00173	-0.00028	0.00029	-0.00071	-0.00101	0.00247	0.00029	-0.00041	-7e-05
	398	-0.00068	-0.00098	-0.00052	-0.00098	-0.00166	-0.00091	-2e-05	-0.00059	-0.00133	-2e-05	-0.00127	-0.00144	-0.00078	0.00157	0.00112	-0.0002	-0.00024
	399	-0.00054	-0.0004	-0.00183	-0.0004	-0.00094	0.00056	-0.00032	4e-05	-0.0004	-0.00038	-0.00051	-0.00035	-0.00118	0.00209	-9e-05	-0.00015	-5e-05
	400	-0.00067	-5e-05	-0.00015	-5e-05	-0.00072	3e-05	0.0003	0.00014	-0.00083	0.00037	0.00026	-0.00052	-0.00012	0.00117	0.00049	-1e-05	-0.00036

## Sheet: Table S3
	Table S3. Raw data for free and combined chlorine analysis using DPD colourimetric method (n=3) during reaction Cl/Cyt=1, pH7 depicted in Figure 1B.
		Chlorine concentration (µM)
	Time (min)	Free Chlorine	Combined Chlorine
	0	82.2 ± 3.0	0
	2	76.5 ± 1.1	0
	5	73.3 ± 0.7	0
	20	55.3 ± 0.3	0
	30	44.8 ± 0.7	3.0 ± 2.1
	120	5.9 ± 0.5	20.9 ± 0.5
	1080 (18 h)	2.9 ± 1.0	19.8 ± 1.0
	1440 (24 h)	1.4 ± 1.1	21.2 ± 0.9
	2880 (48 h)	1.0 ± 0.4	19.9 ± 0.7
	4320 (72 h)	2.7 ± 0.4	20.5 ± 0.3

## Sheet: Table S4
	Table S4. Raw data for reaction progress monitoring of reaction Cl/Aden=1, pH7 depicted in Figures 4A and S2C and D.
		Absorbance (A.U.)
	Wavelength (nm)	0.05 mM HOCl Control (t=0 h)	0.05 mM Adenine Control (t=0 h)	0.05 mM HOCl Control (t=20 h)	0.05 mM Adenine Control (t=20 h)	Sum of Controls	2 m	5 m	10 m	20 m	30 m	1 h	2 h	3 h	18 h	24 h	48 h	72 h
	200	0.03359	0.90666	0.03694	0.90804	0.94025	1.04427	1.01273	0.97471	0.9365	0.93056	0.90624	0.90119	0.90435	0.90621	0.88125	0.89249	0.8993
	201	0.03137	0.94471	0.03309	0.94688	0.97608	1.03648	1.00206	0.96689	0.93248	0.9289	0.90595	0.89704	0.90176	0.90265	0.87395	0.88589	0.89126
	202	0.02643	0.98215	0.02985	0.98761	1.00858	1.02603	0.99445	0.96216	0.93253	0.93001	0.91011	0.90506	0.90823	0.90778	0.88044	0.8894	0.8957
	203	0.024	1.01719	0.02979	1.02121	1.04119	1.01747	0.99187	0.96311	0.93897	0.93981	0.92145	0.91124	0.91298	0.90912	0.88771	0.89611	0.90529
	204	0.02603	1.05289	0.02718	1.05779	1.07892	1.01338	0.98846	0.96369	0.94723	0.95228	0.93302	0.92541	0.92645	0.91899	0.89559	0.90688	0.91414
	205	0.01918	1.07899	0.02525	1.08556	1.09817	1.00105	0.9802	0.96284	0.95224	0.96122	0.94533	0.93522	0.93384	0.92969	0.90387	0.9154	0.91816
	206	0.02016	1.0993	0.02262	1.10374	1.11946	0.99424	0.97285	0.95941	0.95313	0.96398	0.9532	0.94207	0.93945	0.92963	0.9063	0.92014	0.92401
	207	0.01891	1.10124	0.02164	1.10442	1.12015	0.97328	0.95791	0.94874	0.94634	0.96247	0.95019	0.93599	0.93645	0.92203	0.90339	0.91502	0.91655
	208	0.01559	1.09245	0.01952	1.09826	1.10804	0.95137	0.93678	0.9304	0.9341	0.95102	0.93997	0.92994	0.92597	0.91419	0.89171	0.90421	0.90626
	209	0.01427	1.07501	0.01762	1.079	1.08928	0.92625	0.9154	0.91112	0.91795	0.93476	0.92618	0.91305	0.91191	0.89685	0.87406	0.88597	0.88751
	210	0.01266	1.03232	0.01891	1.0347	1.04498	0.89193	0.88272	0.88171	0.88679	0.90166	0.89519	0.88042	0.87726	0.86154	0.83924	0.84899	0.85175
	211	0.0124	0.95492	0.01523	0.95418	0.96732	0.84266	0.83327	0.83042	0.83359	0.84641	0.83519	0.82154	0.81864	0.80396	0.78176	0.78963	0.7962
	212	0.01103	0.86458	0.01421	0.8629	0.87561	0.79074	0.78029	0.77699	0.77422	0.78167	0.77088	0.75796	0.75355	0.73581	0.71231	0.72051	0.72274
	213	0.01003	0.77025	0.01369	0.76592	0.78028	0.73431	0.72404	0.71838	0.70992	0.7172	0.70143	0.68856	0.68501	0.66327	0.64219	0.65103	0.65521
	214	0.00946	0.66721	0.0123	0.66485	0.67667	0.67765	0.66851	0.6582	0.64649	0.64659	0.63042	0.61815	0.61088	0.58751	0.56647	0.57337	0.57968
	215	0.00913	0.56146	0.0126	0.5575	0.57059	0.61827	0.60734	0.59363	0.57484	0.57038	0.54944	0.53637	0.53106	0.50771	0.48784	0.49345	0.49582
	216	0.00741	0.44672	0.01007	0.43685	0.45413	0.5509	0.5422	0.52472	0.49822	0.48929	0.4675	0.45449	0.44733	0.41932	0.40158	0.40605	0.4095
	217	0.00683	0.34735	0.01018	0.33886	0.35418	0.4859	0.47523	0.46121	0.43258	0.41996	0.39674	0.38164	0.376	0.34632	0.32856	0.33556	0.33788
	218	0.00617	0.2757	0.01076	0.26935	0.28187	0.42686	0.41943	0.40469	0.37813	0.36681	0.34497	0.33099	0.32335	0.29376	0.27408	0.28172	0.28364
	219	0.0063	0.22386	0.01108	0.21937	0.23016	0.3756	0.37074	0.36064	0.33806	0.32643	0.30598	0.29228	0.28518	0.25494	0.23463	0.24055	0.24106
	220	0.00583	0.18646	0.01079	0.18178	0.19229	0.33588	0.33181	0.32655	0.30725	0.29878	0.27901	0.26557	0.25798	0.22525	0.20543	0.21231	0.21429
	221	0.00679	0.15883	0.00923	0.15437	0.16562	0.30289	0.30233	0.30062	0.28444	0.27782	0.26128	0.24647	0.23983	0.20274	0.1833	0.19037	0.18974
	222	0.00493	0.13889	0.00884	0.13637	0.14382	0.27195	0.27303	0.27526	0.26645	0.26314	0.24608	0.23281	0.22639	0.18766	0.16864	0.17621	0.17657
	223	0.00578	0.12689	0.00918	0.12469	0.13267	0.2401	0.24529	0.2519	0.2498	0.25043	0.23667	0.22408	0.2162	0.17776	0.15759	0.16544	0.16487
	224	0.00454	0.12046	0.00812	0.11892	0.125	0.21261	0.22104	0.23389	0.2382	0.24313	0.23252	0.21924	0.211	0.17027	0.15172	0.15893	0.15948
	225	0.00399	0.11714	0.00885	0.11619	0.12113	0.19156	0.2024	0.21971	0.2306	0.23712	0.22869	0.21622	0.20829	0.16743	0.14864	0.15547	0.15435
	226	0.0039	0.11774	0.00753	0.11582	0.12164	0.17749	0.18992	0.21139	0.22589	0.23574	0.22989	0.21742	0.20851	0.16493	0.14697	0.15463	0.15397
	227	0.00436	0.11964	0.00816	0.11979	0.124	0.17023	0.1843	0.20756	0.22489	0.23634	0.23011	0.21807	0.20908	0.16551	0.14733	0.15516	0.15456
	228	0.00352	0.12415	0.00623	0.12208	0.12767	0.16701	0.18289	0.20644	0.22571	0.23822	0.23161	0.22032	0.21073	0.16524	0.15019	0.15646	0.15688
	229	0.00382	0.12937	0.00708	0.12891	0.13319	0.1677	0.18254	0.20735	0.22794	0.24066	0.23488	0.22174	0.21433	0.16903	0.15251	0.15806	0.1576
	230	0.0043	0.13775	0.00627	0.1359	0.14205	0.17176	0.18757	0.2119	0.23225	0.24468	0.23908	0.22679	0.218	0.17186	0.1575	0.16329	0.16046
	231	0.00333	0.14459	0.00685	0.14379	0.14792	0.17753	0.19231	0.21745	0.23813	0.24936	0.24441	0.23122	0.22209	0.17656	0.1616	0.16678	0.16656
	232	0.00329	0.15426	0.00614	0.15287	0.15755	0.18426	0.19909	0.22217	0.24323	0.25422	0.2479	0.23626	0.22688	0.18079	0.16788	0.17153	0.1717
	233	0.00302	0.16529	0.00512	0.16346	0.16831	0.19208	0.20688	0.22998	0.24866	0.26037	0.25415	0.24178	0.23323	0.18667	0.17488	0.17898	0.17843
	234	0.00405	0.17703	0.0053	0.17602	0.18108	0.2024	0.21568	0.23694	0.25541	0.26706	0.25944	0.24793	0.23887	0.19456	0.18261	0.18608	0.18509
	235	0.00397	0.18966	0.0051	0.18867	0.19363	0.21413	0.22706	0.24723	0.26389	0.27404	0.26719	0.25476	0.24697	0.202	0.19062	0.19386	0.19363
	236	0.00371	0.20379	0.00587	0.20322	0.2075	0.22729	0.23936	0.25796	0.27341	0.28209	0.27468	0.26241	0.25484	0.21178	0.1995	0.20281	0.20281
	237	0.00315	0.21847	0.00565	0.2185	0.22162	0.24085	0.25184	0.26831	0.28274	0.29024	0.28217	0.27137	0.26318	0.22044	0.20961	0.21273	0.21279
	238	0.00425	0.23445	0.00446	0.23433	0.2387	0.25577	0.26567	0.28095	0.29225	0.30013	0.29058	0.27968	0.27265	0.2305	0.22078	0.22381	0.22334
	239	0.00388	0.25317	0.0043	0.2532	0.25705	0.27418	0.28216	0.29553	0.30442	0.31084	0.3022	0.291	0.28363	0.24363	0.23411	0.23757	0.23677
	240	0.00328	0.27106	0.00492	0.27267	0.27434	0.2915	0.29871	0.30983	0.31664	0.32173	0.31215	0.30148	0.29448	0.25659	0.24723	0.25128	0.24934
	241	0.00428	0.29182	0.00445	0.2914	0.2961	0.31187	0.31789	0.326	0.33135	0.33473	0.32434	0.31486	0.30739	0.27007	0.26102	0.26426	0.26405
	242	0.00328	0.31196	0.00442	0.31305	0.31524	0.33206	0.33551	0.34261	0.34448	0.34672	0.33677	0.32619	0.31902	0.28506	0.27656	0.2793	0.27956
	243	0.00445	0.33578	0.00418	0.33591	0.34023	0.35423	0.35622	0.36032	0.35939	0.3609	0.34997	0.33954	0.33222	0.3004	0.29147	0.29523	0.29485
	244	0.00358	0.35633	0.00469	0.35819	0.35991	0.3761	0.37674	0.37869	0.37525	0.37468	0.36227	0.35365	0.34688	0.31657	0.30825	0.31167	0.31091
	245	0.00343	0.37858	0.00416	0.38126	0.38201	0.39974	0.39855	0.39684	0.39187	0.39049	0.37691	0.3672	0.36166	0.33202	0.3258	0.32969	0.32785
	246	0.00354	0.40243	0.00432	0.40535	0.40597	0.42371	0.42192	0.41769	0.41021	0.40669	0.39288	0.38296	0.37786	0.35011	0.34262	0.34555	0.34604
	247	0.00381	0.42727	0.00557	0.42941	0.43108	0.44791	0.44393	0.43781	0.42649	0.42161	0.40763	0.39758	0.39304	0.3677	0.36023	0.36239	0.36274
	248	0.00492	0.45134	0.00525	0.45327	0.45626	0.47157	0.46681	0.45759	0.4435	0.43886	0.42402	0.41396	0.40956	0.38571	0.37645	0.38098	0.38092
	249	0.00469	0.47359	0.00515	0.47741	0.47828	0.49609	0.48977	0.47851	0.46262	0.45609	0.43955	0.43078	0.42548	0.40216	0.39543	0.39899	0.39933
	250	0.00463	0.49627	0.00589	0.50018	0.5009	0.51723	0.50955	0.49684	0.47895	0.47195	0.45585	0.44476	0.44122	0.41957	0.41248	0.41452	0.41522
	251	0.00441	0.51837	0.00684	0.52353	0.52278	0.53867	0.52967	0.51561	0.49537	0.48685	0.46988	0.46084	0.45565	0.436	0.42919	0.43247	0.43302
	252	0.00524	0.53784	0.00616	0.54338	0.54308	0.55755	0.54895	0.53227	0.5112	0.49966	0.48279	0.47225	0.46887	0.45143	0.44401	0.44746	0.44817
	253	0.00511	0.55604	0.00653	0.56158	0.56115	0.5768	0.56596	0.5476	0.52537	0.51374	0.49484	0.48594	0.48232	0.46397	0.45795	0.46277	0.46213
	254	0.00595	0.57482	0.00741	0.57898	0.58077	0.59367	0.58201	0.56034	0.53666	0.52588	0.50678	0.49745	0.49361	0.47776	0.46994	0.47523	0.47556
	255	0.00642	0.58971	0.00696	0.59419	0.59613	0.60905	0.59644	0.57548	0.54916	0.53694	0.51788	0.50696	0.50462	0.48888	0.48189	0.48759	0.48775
	256	0.00672	0.6047	0.00756	0.6087	0.61142	0.62231	0.60864	0.58707	0.56073	0.54519	0.52747	0.51719	0.51411	0.49982	0.49369	0.49845	0.49905
	257	0.00692	0.61498	0.00698	0.62021	0.6219	0.63202	0.61921	0.59631	0.56851	0.55501	0.53471	0.52596	0.52264	0.50847	0.50127	0.50733	0.50867
	258	0.0066	0.62679	0.00813	0.63306	0.63339	0.63744	0.62465	0.60198	0.57512	0.56072	0.54195	0.53284	0.52926	0.51892	0.51023	0.516	0.5168
	259	0.008	0.63689	0.00897	0.64176	0.64489	0.64157	0.62717	0.60642	0.58058	0.56711	0.54918	0.54024	0.53762	0.52584	0.51913	0.52392	0.52455
	260	0.00692	0.64357	0.00893	0.64832	0.65049	0.6408	0.62834	0.6076	0.58306	0.5698	0.55341	0.54402	0.54143	0.52973	0.52298	0.52807	0.53043
	261	0.00785	0.64207	0.00916	0.64892	0.64992	0.63571	0.62327	0.60413	0.57945	0.56874	0.55175	0.54217	0.54009	0.5296	0.52199	0.52881	0.52968
	262	0.00888	0.63326	0.00991	0.63878	0.64214	0.62625	0.61479	0.59605	0.57202	0.56015	0.54361	0.53511	0.53322	0.52347	0.51558	0.5211	0.52192
	263	0.00921	0.61694	0.01109	0.62133	0.62615	0.61164	0.59846	0.58041	0.55696	0.54524	0.52838	0.52088	0.51912	0.51093	0.50217	0.50707	0.50924
	264	0.01011	0.59402	0.01115	0.59685	0.60413	0.59459	0.58229	0.56283	0.53944	0.52764	0.51069	0.50414	0.50026	0.49312	0.48423	0.49004	0.49162
	265	0.01149	0.56996	0.01142	0.57199	0.58145	0.57458	0.56182	0.54353	0.5199	0.5066	0.49182	0.48499	0.48236	0.47482	0.46688	0.47216	0.47348
	266	0.01086	0.547	0.01184	0.54866	0.55786	0.54967	0.54053	0.52201	0.49951	0.48881	0.47387	0.46677	0.46478	0.45681	0.44957	0.45417	0.45651
	267	0.01172	0.52885	0.01314	0.53124	0.54057	0.52478	0.51636	0.50002	0.48222	0.47192	0.45831	0.45174	0.4504	0.44262	0.43456	0.4405	0.4403
	268	0.01337	0.5111	0.01305	0.51208	0.52447	0.497	0.48923	0.47626	0.46223	0.45511	0.44248	0.43658	0.43451	0.42767	0.42053	0.42458	0.42577
	269	0.01229	0.48084	0.01395	0.48472	0.49313	0.46259	0.45674	0.44612	0.43452	0.42912	0.41888	0.41313	0.41224	0.40542	0.39751	0.40045	0.40345
	270	0.01279	0.43819	0.01511	0.44118	0.45098	0.42293	0.4173	0.40981	0.39845	0.39431	0.38327	0.37874	0.37779	0.37277	0.36241	0.36773	0.36968
	271	0.01403	0.38372	0.01421	0.38279	0.39775	0.38151	0.37741	0.3694	0.3564	0.35134	0.34164	0.33709	0.33567	0.33012	0.32272	0.32572	0.3265
	272	0.0148	0.32283	0.01613	0.32334	0.33763	0.33907	0.33451	0.32478	0.31175	0.30592	0.295	0.29077	0.2901	0.2856	0.27564	0.27999	0.28134
	273	0.01558	0.26842	0.01628	0.2663	0.284	0.30122	0.29621	0.28612	0.27132	0.2632	0.25245	0.24954	0.24772	0.24246	0.23311	0.23709	0.23995
	274	0.01521	0.22092	0.01725	0.22	0.23613	0.26786	0.26208	0.25192	0.23513	0.22656	0.21508	0.21264	0.21039	0.2066	0.19808	0.20068	0.20265
	275	0.01664	0.18198	0.01751	0.17942	0.19862	0.23774	0.23209	0.2209	0.20486	0.19526	0.18391	0.18159	0.17998	0.17436	0.16669	0.1699	0.17131
	276	0.01723	0.15047	0.01811	0.14787	0.1677	0.21178	0.20713	0.19684	0.17971	0.17144	0.16	0.15722	0.15567	0.15033	0.14235	0.14552	0.14648
	277	0.01802	0.12733	0.01801	0.12433	0.14535	0.18771	0.18373	0.17444	0.15909	0.15024	0.13989	0.13735	0.13527	0.12969	0.12239	0.12629	0.12743
	278	0.01818	0.10835	0.01874	0.10474	0.12653	0.16733	0.16355	0.15535	0.14105	0.1327	0.12388	0.122	0.11969	0.11237	0.10607	0.10945	0.11095
	279	0.01871	0.08932	0.01956	0.08692	0.10803	0.14674	0.1431	0.13552	0.12209	0.11568	0.10688	0.10548	0.10358	0.09743	0.09135	0.09417	0.09449
	280	0.01898	0.0714	0.02009	0.0705	0.09038	0.1262	0.12414	0.11762	0.10606	0.10051	0.09261	0.09125	0.089	0.08266	0.07647	0.07979	0.07954
	281	0.02013	0.05626	0.02015	0.05434	0.07639	0.10728	0.10595	0.10072	0.09042	0.08529	0.0781	0.07692	0.07489	0.06846	0.06104	0.0653	0.06612
	282	0.02048	0.04208	0.0211	0.03959	0.06256	0.0902	0.08828	0.08409	0.07546	0.07141	0.06539	0.06371	0.06186	0.05668	0.04873	0.05256	0.05319
	283	0.02024	0.02977	0.02023	0.02703	0.05001	0.07425	0.07371	0.07059	0.06316	0.05966	0.054	0.05289	0.05146	0.04459	0.0384	0.04119	0.04242
	284	0.02003	0.02046	0.02073	0.01881	0.04049	0.06256	0.06187	0.05925	0.05427	0.05154	0.04638	0.04451	0.04387	0.0368	0.0302	0.03276	0.03366
	285	0.02055	0.01309	0.02069	0.0115	0.03364	0.04993	0.0506	0.04872	0.04515	0.04346	0.03917	0.03789	0.03602	0.02876	0.02246	0.02658	0.02708
	286	0.02194	0.00974	0.02129	0.00813	0.03168	0.04143	0.04226	0.04148	0.03854	0.03774	0.03497	0.0331	0.03193	0.02443	0.01785	0.02214	0.02182
	287	0.02152	0.00635	0.02172	0.00523	0.02787	0.0346	0.0347	0.03421	0.03367	0.03311	0.03076	0.02914	0.02746	0.02085	0.01329	0.0174	0.01776
	288	0.02173	0.004	0.02133	0.00306	0.02573	0.02969	0.03036	0.03119	0.02935	0.03003	0.02754	0.02657	0.02434	0.01698	0.01049	0.01485	0.01439
	289	0.02178	0.00287	0.02206	0.00264	0.02465	0.02447	0.02521	0.02614	0.02553	0.02727	0.02517	0.02352	0.02206	0.01446	0.00959	0.01179	0.01286
	290	0.02127	0.00236	0.02147	0.00147	0.02363	0.02093	0.02188	0.02263	0.02361	0.02492	0.02337	0.02089	0.01989	0.01255	0.00692	0.01127	0.01071
	291	0.02171	0.00178	0.02069	7e-05	0.02349	0.01938	0.0204	0.02121	0.02254	0.02403	0.02203	0.02117	0.01893	0.01081	0.00682	0.00961	0.00936
	292	0.0222	0.00172	0.02253	0.00069	0.02392	0.01597	0.0176	0.01849	0.02049	0.02144	0.02022	0.01856	0.01781	0.01091	0.00392	0.00878	0.009
	293	0.02282	0.00151	0.02103	0.00017	0.02433	0.01534	0.01617	0.01766	0.01882	0.02107	0.02008	0.01862	0.01668	0.00959	0.00375	0.00766	0.00794
	294	0.02195	0.00078	0.02133	-3e-05	0.02273	0.01348	0.01468	0.01677	0.01759	0.02062	0.01939	0.01713	0.01544	0.0092	0.00279	0.00632	0.00773
	295	0.02186	0.00105	0.02186	0.001	0.02291	0.0129	0.01394	0.01579	0.01723	0.02079	0.01976	0.01657	0.01531	0.00896	0.00337	0.00581	0.0068
	296	0.02143	0.00098	0.02055	-0.00025	0.02241	0.01123	0.01276	0.01486	0.01737	0.01951	0.01839	0.01686	0.01506	0.00766	0.00274	0.00601	0.00665
	297	0.02123	0.00077	0.02137	-0.00017	0.022	0.00991	0.01197	0.01449	0.01509	0.01955	0.01804	0.01589	0.01421	0.00749	0.00283	0.00571	0.00623
	298	0.02049	-1e-05	0.02052	-0.00046	0.02048	0.01051	0.01213	0.01418	0.01626	0.01961	0.01818	0.01682	0.01414	0.00632	0.00226	0.00586	0.00674
	299	0.02096	0.0009	0.02078	0.00014	0.02186	0.0094	0.01065	0.01304	0.01573	0.01917	0.01805	0.01557	0.01382	0.00703	0.00292	0.00557	0.00534
	300	0.01998	0.00072	0.01991	0.00024	0.0207	0.00827	0.01078	0.01249	0.015	0.01724	0.01738	0.01498	0.01308	0.00693	0.00251	0.00542	0.0049
	301	0.02033	-0.00027	0.01903	-0.00065	0.02006	0.00832	0.01001	0.0119	0.01469	0.01788	0.01719	0.01534	0.01328	0.0062	0.00192	0.0043	0.00582
	302	0.0193	0.00056	0.01864	-0.0003	0.01986	0.00794	0.01018	0.01175	0.01528	0.01866	0.01831	0.01508	0.01328	0.0054	0.00154	0.00476	0.00513
	303	0.01999	0.00113	0.01891	0.00011	0.02112	0.00671	0.00911	0.011	0.01411	0.01824	0.01646	0.01417	0.01345	0.00581	0.00122	0.00449	0.00473
	304	0.01935	-0.00055	0.0182	-0.0005	0.0188	0.00701	0.00886	0.01088	0.01476	0.01759	0.01619	0.01416	0.01268	0.00509	0.00163	0.00478	0.00484
	305	0.01771	-0.00023	0.01845	0.00037	0.01748	0.00686	0.00807	0.01145	0.01363	0.0174	0.01656	0.01335	0.01218	0.00535	0.00109	0.00513	0.00527
	306	0.01816	0.00081	0.01624	-0.0012	0.01897	0.00491	0.00736	0.00939	0.0137	0.01598	0.01516	0.01265	0.01124	0.00597	0.00338	0.00336	0.00367
	307	0.01732	0.00014	0.01543	-0.00176	0.01746	0.00622	0.00813	0.01037	0.01385	0.01667	0.01687	0.01298	0.01139	0.00501	0.00167	0.0043	0.00379
	308	0.01796	0.00033	0.01574	6e-05	0.01829	0.00496	0.00627	0.00919	0.01246	0.0156	0.01482	0.01199	0.01024	0.00538	0.00137	0.00385	0.00433
	309	0.01678	0.00158	0.01572	0.0003	0.01836	0.00547	0.00665	0.0094	0.01299	0.01532	0.01486	0.01166	0.01053	0.00514	0.00089	0.00277	0.00417
	310	0.01706	0.00083	0.01494	-0.00023	0.01789	0.00543	0.00723	0.01086	0.0137	0.0164	0.01607	0.01252	0.01119	0.00528	0.00179	0.00398	0.00462
	311	0.01576	0.00096	0.0141	-0.00057	0.01672	0.00543	0.00655	0.0101	0.01299	0.01574	0.01508	0.01259	0.01045	0.00542	0.00174	0.00396	0.00356
	312	0.01587	0.00099	0.01331	-0.00083	0.01686	0.00483	0.00589	0.00891	0.0124	0.01472	0.01484	0.01169	0.0097	0.00523	0.00043	0.00401	0.00394
	313	0.01438	-0.00021	0.01362	0.00026	0.01417	0.00378	0.00536	0.00881	0.01229	0.016	0.01409	0.01163	0.00922	0.00533	0.00134	0.00256	0.00304
	314	0.01463	0.00051	0.01359	-0.00085	0.01514	0.00417	0.00641	0.009	0.01257	0.01561	0.01418	0.01056	0.01025	0.00523	0.00096	0.00387	0.00327
	315	0.01458	0.00098	0.01385	-0.00023	0.01556	0.00304	0.00473	0.00753	0.01135	0.01462	0.01292	0.01022	0.00877	0.00518	0.00123	0.00322	0.00361
	316	0.01342	0.00083	0.01172	0.00025	0.01425	0.00415	0.00552	0.00845	0.01239	0.016	0.01412	0.01116	0.00965	0.00537	0.00155	0.00412	0.00412
	317	0.01246	2e-05	0.01136	-0.00052	0.01248	0.00335	0.00523	0.00819	0.01103	0.01458	0.01335	0.0102	0.00878	0.00473	0.00141	0.00365	0.0043
	318	0.01163	-0.00029	0.01017	-0.00061	0.01134	0.00294	0.00454	0.00666	0.01082	0.01384	0.01313	0.00983	0.00796	0.00447	0.00059	0.0035	0.00436
	319	0.01159	0.00104	0.01087	5e-05	0.01263	0.00357	0.00452	0.00728	0.01163	0.01502	0.01306	0.00983	0.00905	0.00493	0.00014	0.00333	0.00413
	320	0.01044	-0.00022	0.00951	-0.00072	0.01022	0.00318	0.00455	0.00752	0.01048	0.0136	0.01229	0.00938	0.00795	0.00484	0.00133	0.00432	0.00326
	321	0.00983	-4e-05	0.00912	-0.00057	0.00979	0.00319	0.00444	0.008	0.01125	0.01412	0.01229	0.00963	0.00875	0.00373	0.00068	0.00313	0.00343
	322	0.00981	0.00073	0.00864	-0.00023	0.01054	0.00351	0.00464	0.00757	0.01097	0.01364	0.01196	0.00834	0.00705	0.00457	0.00074	0.00341	0.00363
	323	0.00872	-1e-05	0.00863	-0.00045	0.00871	0.0046	0.00457	0.00794	0.01119	0.01373	0.01159	0.00946	0.00769	0.0045	0.00154	0.0031	0.00325
	324	0.00824	-0.00017	0.00728	-0.00125	0.00807	0.00345	0.00357	0.00774	0.01118	0.01365	0.0113	0.00772	0.0068	0.0034	0.00061	0.00408	0.00291
	325	0.00842	0.00054	0.00781	-0.00092	0.00896	0.00305	0.00346	0.00707	0.01066	0.0125	0.0108	0.00752	0.00654	0.00386	0.00078	0.00367	0.00379
	326	0.00745	-4e-05	0.00592	-0.00072	0.00741	0.00344	0.00406	0.00597	0.00957	0.01328	0.01124	0.00816	0.00686	0.00291	0.00078	0.00245	0.00312
	327	0.00707	0.00025	0.007	-0.00041	0.00732	0.00183	0.00343	0.00599	0.00939	0.01164	0.01052	0.00746	0.00608	0.00353	0.00112	0.00313	0.00399
	328	0.00584	-0.00035	0.00608	5e-05	0.00549	0.00419	0.00575	0.00888	0.01106	0.01382	0.01126	0.00836	0.00679	0.00409	0.00092	0.00301	0.00307
	329	0.00566	-0.00053	0.00593	-0.00054	0.00513	0.0013	0.0035	0.00507	0.00892	0.01073	0.00958	0.00602	0.00487	0.00364	0.00113	0.0037	0.00262
	330	0.00609	-7e-05	0.00584	0.00085	0.00602	0.00229	0.00381	0.00633	0.00948	0.01103	0.00991	0.0069	0.00496	0.0041	0.00075	0.00314	0.00267
	331	0.00555	-0.00011	0.00624	0.00036	0.00544	0.00256	0.00314	0.00571	0.00838	0.01027	0.00803	0.0053	0.00467	0.00386	0.00142	0.003	0.00194
	332	0.00528	0.00074	0.00366	-0.00168	0.00602	0.0025	0.00268	0.00595	0.00851	0.01037	0.00805	0.00505	0.004	0.00215	-0.00134	0.003	0.00285
	333	0.00485	-0.00013	0.00542	-8e-05	0.00472	0.00283	0.00344	0.00625	0.01036	0.01094	0.00861	0.00572	0.00364	0.00341	0.00202	0.00304	0.00139
	334	0.00457	5e-05	0.00364	4e-05	0.00462	0.00431	0.00315	0.00613	0.00975	0.01109	0.00909	0.00613	0.00474	0.00268	-6e-05	0.0031	0.00065
	335	0.00448	-0.00041	0.00473	0.00026	0.00407	0.00343	0.00417	0.00758	0.00961	0.01133	0.00785	0.0053	0.00631	0.00294	0.00058	0.00238	0.0022
	336	0.00357	0.0001	0.00374	-0.00013	0.00367	0.00442	0.00518	0.00823	0.00968	0.01248	0.0099	0.00647	0.0054	0.00369	6e-05	0.00269	0.00181
	337	0.00471	-0.00026	0.00392	-0.00013	0.00445	0.0026	0.00323	0.00562	0.00869	0.01001	0.00712	0.00383	0.00403	0.00213	0.00038	0.00244	0.00153
	338	0.00367	0.00027	0.00483	0.00097	0.00394	0.00255	0.00315	0.00626	0.00797	0.00938	0.00609	0.00439	0.0034	0.00331	0.00108	0.00319	0.00157
	339	0.00349	0.00144	0.00301	-0.00058	0.00493	0.00278	0.00475	0.00666	0.00865	0.00954	0.00852	0.00448	0.00307	0.00312	-0.00061	0.00314	0.00183
	340	0.00335	0.0004	0.00276	0.00037	0.00375	0.00315	0.00333	0.00565	0.00829	0.0093	0.00709	0.00441	0.00369	0.00304	-0.00016	0.00209	0.00193
	341	0.00158	-0.00103	0.00274	0.00019	0.00055	0.00233	0.00405	0.00673	0.00898	0.01048	0.00762	0.00457	0.00348	0.00355	-0.00097	0.00234	0.00085
	342	0.00255	0.00044	0.00232	0.00017	0.00299	0.00343	0.00285	0.00616	0.00781	0.0102	0.0069	0.00493	0.00236	0.00207	-0.00084	0.00187	0.00174
	343	0.00314	-0.00031	0.0029	0.00049	0.00283	0.0019	0.00381	0.00564	0.00767	0.00939	0.00755	0.00366	0.00228	0.00138	-0.0012	0.00072	0.00161
	344	0.00258	0.0003	0.00125	0.00012	0.00288	0.00213	0.00371	0.00582	0.00824	0.00912	0.00558	0.00333	0.00269	0.00139	-0.00027	0.00225	0.00159
	345	0.00167	0.00036	0.00156	-0.00083	0.00203	0.00356	0.005	0.00696	0.00782	0.00952	0.00653	0.00394	0.00327	0.00108	0.00011	0.0015	0.00114
	346	0.00174	-6e-05	0.00148	-0.00074	0.00168	0.00375	0.00399	0.00805	0.00811	0.00973	0.00642	0.00413	0.00343	0.00105	-0.00057	0.00188	0.00083
	347	0.00254	0.00125	0.00233	0.00091	0.00379	0.00341	0.00449	0.00606	0.00862	0.00903	0.00558	0.00374	0.00213	0.00232	-0.00069	0.00248	0.00146
	348	0.00108	0.00089	0.00022	-0.00028	0.00197	0.0032	0.0043	0.00693	0.00777	0.00853	0.00634	0.0032	0.00239	0.00164	-0.00176	0.00185	0.00224
	349	0.00173	-0.00042	0.00123	-0.0007	0.00131	0.004	0.00557	0.0073	0.00933	0.00942	0.00671	0.00407	0.00207	0.00115	-0.00011	0.00216	0.00121
	350	0.0031	0.00108	0.00024	-0.00114	0.00418	0.00317	0.00476	0.00624	0.00807	0.0085	0.0064	0.00282	0.00166	0.00197	-0.00134	0.00398	0.00238
	351	0.00141	0.00018	0.00021	-0.00027	0.00159	0.00338	0.0049	0.00579	0.00721	0.0088	0.00554	0.00357	0.00243	0.00193	-0.00114	0.00186	0.00081
	352	0.00144	0.00128	0.00117	1e-05	0.00272	0.00345	0.00496	0.00507	0.00843	0.00865	0.00424	0.00378	0.00265	0.00127	-0.00081	0.00059	0.00108
	353	0.00203	-0.00071	0.00133	0.00063	0.00132	0.00347	0.00513	0.00659	0.00769	0.00826	0.00664	0.00316	0.00227	0.00224	-0.00055	0.00138	0.00035
	354	0.00014	-0.00185	0.00076	-0.00096	-0.00171	0.00342	0.00432	0.00625	0.00785	0.00824	0.00538	0.00275	0.0012	0.00024	-0.00035	0.00108	0.00208
	355	0.00076	0.00087	0.00042	-0.00068	0.00163	0.00294	0.00438	0.00537	0.00774	0.00815	0.00481	0.00263	0.00121	0.00099	-0.00123	0.00137	0.00109
	356	0.00033	-0.0001	0.00014	-3e-05	0.00023	0.00372	0.00398	0.00576	0.00701	0.00755	0.0044	0.00233	0.00172	0.00082	-7e-05	0.0002	0.00142
	357	0.00045	0.00086	0.00102	-9e-05	0.00131	0.00245	0.0034	0.0051	0.00728	0.00817	0.00378	0.00071	0.0001	0.0014	-0.00221	0.00091	0.00093
	358	0.00102	-0.00025	-0.00055	-0.0006	0.00077	0.00225	0.0042	0.0049	0.00738	0.00705	0.00446	0.00221	0.00192	0.00091	-0.00276	0.00107	0.00096
	359	0.0015	0.00069	-0.00016	-0.00068	0.00219	0.00293	0.00353	0.00551	0.00696	0.00575	0.00454	0.0018	0.00054	0.00065	-0.00084	0.00094	0.00013
	360	0.00054	0.00054	0.00064	-0.00034	0.00108	0.00278	0.00403	0.0055	0.00613	0.00712	0.00409	0.00104	0.00095	0.0015	-0.00069	0.00082	0.00074
	361	0.00082	0.00033	0.00027	-0.00049	0.00115	0.00319	0.00489	0.00634	0.00715	0.00683	0.00343	0.00224	0.00178	0.00084	-0.00131	0.001	0.00075
	362	0.00102	0.00091	0.00043	-0.00036	0.00193	0.0018	0.00387	0.00546	0.00599	0.00657	0.00362	0.00185	0.00031	0.00077	-0.00087	0.00211	0.00081
	363	0.00177	-0.0003	-0.0001	-0.00051	0.00147	0.00335	0.00314	0.00458	0.00664	0.00657	0.00264	0.00188	0.00095	0.0004	-0.00203	0.00051	0.00057
	364	0.00081	0.0009	0.00013	-6e-05	0.00171	0.00417	0.00475	0.00501	0.00718	0.00715	0.00419	0.00324	0.00172	0.00101	-0.00193	0.00162	0.00073
	365	0.0012	0.00079	0.00024	-0.00072	0.00199	0.00313	0.00403	0.00492	0.00587	0.00631	0.00345	0.00121	0.00066	0.00066	-0.00012	0.00188	0.00111
	366	-0.00015	-5e-05	0.0005	0.00026	-0.0002	0.00299	0.00448	0.00503	0.00544	0.00547	0.00298	0.00143	0.00112	0.00043	-0.00076	0.00109	0.00073
	367	0.00144	-0.00065	7e-05	5e-05	0.00079	0.00432	0.00466	0.00563	0.00742	0.00718	0.00398	0.00206	0.00161	0.00077	-0.00142	0.00069	0.00091
	368	-0.00011	-0.00085	0.00013	-0.00112	-0.00096	0.00279	0.00307	0.00561	0.00562	0.00518	0.00261	0.00173	0.0007	4e-05	-0.00217	0.00044	0.00053
	369	0.00029	0.00049	0.00039	9e-05	0.00078	0.00379	0.00337	0.00596	0.00615	0.00558	0.00425	0.00128	0.00075	0.00104	-0.0004	0.00037	-0.00015
	370	3e-05	0.00031	0.00041	-0.00056	0.00034	0.00302	0.00338	0.00508	0.00528	0.00591	0.00362	0.00066	0.00061	0.00033	-0.00042	0.0016	-0.00031
	371	0.00185	0.00182	0.00019	-0.00114	0.00367	0.00127	0.00304	0.00432	0.00388	0.00377	0.00224	0.00036	-0.00063	6e-05	-0.00165	0.00041	-9e-05
	372	-0.00026	-0.00032	0.00013	-0.00045	-0.00058	0.00397	0.00405	0.00415	0.00514	0.00487	0.00186	0.00131	0.0001	0.00065	-0.0005	0.00185	0.00086
	373	0.00105	0.00021	-0.00028	0.00054	0.00126	0.00433	0.00535	0.00446	0.00643	0.00624	0.00346	0.00339	0.00162	0.00103	-0.00028	-4e-05	-2e-05
	374	0.00137	0.00098	-0.00044	-0.00068	0.00235	0.00289	0.00454	0.0048	0.00553	0.00545	0.00295	0.00148	-0.00014	0.00055	-0.00148	-0.00027	0.00091
	375	0.00053	0.00046	0.00043	-0.00018	0.00099	0.00344	0.00447	0.00516	0.00539	0.00408	0.00243	0.00078	0.00048	0.00061	-0.00098	0.00042	0.00085
	376	0.00077	0.00037	-0.00065	-1e-05	0.00114	0.00276	0.00454	0.00414	0.00473	0.00445	0.00216	0.00081	-2e-05	0.00014	-2e-05	-0.0007	0.00063
	377	0.0007	0.00019	0.0011	0.00071	0.00089	0.00216	0.00504	0.00426	0.004	0.00414	0.0023	0.00127	0.00062	0.00187	-0.00195	0.0011	0
	378	0.00037	0.00025	8e-05	5e-05	0.00062	0.00273	0.00277	0.004	0.00363	0.00398	0.00151	-0.00026	-0.00012	0.00048	-0.00151	-0.00023	-0.00013
	379	-0.00047	-0.00061	0.00022	0.00017	-0.00108	0.00265	0.00308	0.0045	0.00428	0.00403	0.00211	0.001	0.00047	0.00036	-0.00058	0.00101	2e-05
	380	0.00071	0.00083	0.00013	-0.00145	0.00154	0.00312	0.00398	0.00467	0.00506	0.0048	0.00357	0.00205	0.00169	0.00039	-0.00088	0.00069	0.00011
	381	0.00035	0.00115	0.00107	-0.00021	0.0015	0.00075	0.00297	0.00246	0.00327	0.004	0.00201	0.00069	-0.0005	0.00054	-0.00207	0.00079	-0.00047
	382	0.00024	0.00085	-0.00019	0.0001	0.00109	0.00092	0.00243	0.00313	0.00203	0.00348	0.00084	-0.00015	-0.00099	0.00078	-0.00111	0.00055	-1e-05
	383	0.00036	0.00056	0.00048	-0.00059	0.00092	0.00139	0.00153	0.00253	0.00339	0.00023	0.00048	0.00011	-0.00062	0.00066	-0.00091	0.00039	0.00069
	384	0.00025	0.001	-0.00042	-0.00109	0.00125	0.00158	0.00299	0.00214	0.00329	0.00344	0.00191	0.00096	0.00095	-0.00034	-0.00124	-0.00109	0.0008
	385	-0.00036	0.00076	-0.00048	-0.00107	0.0004	0.00078	0.00332	0.00357	0.00345	0.00222	0.00129	0.00037	-0.00056	0.00062	-0.001	0.00035	-0.0003
	386	0.0008	-2e-05	-0.00052	0.00028	0.00078	0.00149	0.00183	0.0019	0.00252	0.00209	0.00151	0.00023	1e-05	0.00049	-0.00194	-0.00027	0.00045
	387	0.00107	0.00018	-0.00026	-0.00026	0.00125	0.00107	0.00177	0.001	0.0011	0.00177	0.00123	7e-05	-0.00059	0.00063	-0.00133	-0.00035	-0.00042
	388	0.0009	0.00025	-0.00086	-0.00059	0.00115	0.00159	0.00241	0.00163	0.00327	0.00272	0.00214	0.00069	0.00015	0.00025	-0.00036	0.00043	-0.00031
	389	0.00073	4e-05	0.00015	0.00053	0.00077	0.00063	0.00207	0.00204	0.00251	0.00168	0.00069	0.00098	0.00014	0.00043	-0.00137	8e-05	0.00019
	390	0.00065	0.00107	-0.00012	-0.00026	0.00172	0.0011	0.00127	0.00203	0.00232	0.00136	0.00127	0.00047	-0.00124	-0.00024	-0.00256	0.00092	-0.00018
	391	0.0006	7e-05	0.00095	0.00089	0.00067	0.00073	0.00175	0.00105	0.00239	0.0013	0.00085	-3e-05	-0.00042	0.0015	-0.001	-0.00024	0.00016
	392	0.00027	0.00094	-0.00078	-3e-05	0.00121	0.0001	0.00076	0.00095	0.00106	0.00193	0.00072	-0.00097	0.00031	0.00012	-0.00091	0.00102	-0.00028
	393	0.00086	0.00081	-0.00056	-0.00092	0.00167	0.00056	0.00071	0.00055	0.00158	0.00069	-0.00028	-0.00012	-0.00097	0.00056	-0.00188	0.00158	-0.0006
	394	-0.00054	-0.00067	0.00043	8e-05	-0.00121	0.00054	-0.00031	0.00051	0.00176	0.0006	0.00085	-0.00028	-0.0006	0.00097	-0.00259	0.00142	0.00062
	395	-9e-05	-0.00048	0	-0.00014	-0.00057	0.00103	0.00051	0.00069	0.00173	0.00208	0.00095	0.00031	-0.00048	-0.00051	-0.00124	-2e-05	-7e-05
	396	-0.00094	-0.00063	0.00048	0.00038	-0.00157	0.00108	0.00105	-0.00012	0.00062	7e-05	0.00024	0.00044	0.00016	0.00147	-0.00085	0.00155	-0.00017
	397	0.00099	0.00088	0.00046	-0.00023	0.00187	0.00171	0.00096	-0.00011	0.00094	0.00046	0.00111	0.00073	-0.00048	-0.00037	-0.00265	0.00066	6e-05
	398	0.00089	0.00127	-9e-05	-0.00017	0.00216	0.0002	-0.0003	-0.00044	0.00083	0.00109	0.0005	0.00011	-0.00064	-0.00031	-0.00203	-0.00034	0.00053
	399	5e-05	3e-05	8e-05	-9e-05	8e-05	-0.00089	-0.0014	-0.00093	-0.00117	-0.00135	-0.00035	-0.00141	-0.00204	0.00042	-0.00159	0.00012	-4e-05
	400	0.00069	-0.0004	-0.00011	-8e-05	0.00029	-0.0004	-0.00011	-0.00089	-0.00014	-0.00032	-0.0001	2e-05	-0.00052	0.00026	-0.00101	-2e-05	-0.00014

## Sheet: Table S5
	Table S5. Raw data for free and combined chlorine analysis using DPD colourimetric method (n=3) during reaction Cl/Aden=1, pH7 depicted in Figure 4B.
		Chlorine concentration (µM)
	Time (min)	Free Chlorine	Combined Chlorine
	0	46.3 ± 0.4	0
	2	36.9 ± 1.5	0
	5	32.8 ± 2.6	0
	20	11.1 ± 0.9	0.3 ± 2.4
	30	8.1 ± 2.6	1.9 ± 3.0
	120	3.1 ± 1.7	5.3 ± 1.5
	1080 (18 h)	2.6 ± 1.7	5.0 ± 1.6
	1440 (24 h)	1.8 ± 0.07	5.4 ± 0.8
	2880 (48 h)	1.3 ± 0.3	5.3 ± 0.9
	4320 (72 h)	2.8 ± 0.01	5.6 ± 1.6

## Sheet: Table S6
	Table S6. Raw data for reaction progress monitoring of reaction Cl/Aden=10, pH4 depicted in Figures 5A and S2E and F.
		Absorbance (A.U.)
	Wavelength (nm)	0.5 mM HOCl Control (t=0 h)	0.05 mM Adenine Control (t=0 h)	0.5 mM HOCl Control (t=20 h)	0.05 mM Adenine Control (t=20 h)	Sum of Controls	2 m	5 m	10 m	20 m	30 m	1 h	2 h	3 h	18 h	24 h	48 h	72 h
	200	0.13191	0.92494	0.10665	0.90175	1.05685	0.79484	0.94896	0.85272	0.79484	0.76105	0.72801	0.67096	0.65339	0.58825	0.7033	0.57321	0.59493
	201	0.10416	0.94265	0.08102	0.92286	1.04681	0.72881	0.88873	0.78667	0.72881	0.69664	0.66116	0.59959	0.58155	0.51585	0.62535	0.5022	0.51934
	202	0.08462	0.96576	0.06848	0.94456	1.05038	0.6833	0.84159	0.74161	0.6833	0.64809	0.61282	0.55285	0.53394	0.46786	0.56925	0.45239	0.46802
	203	0.06911	0.98237	0.05307	0.95956	1.05148	0.64923	0.8049	0.70793	0.64923	0.6139	0.57766	0.51384	0.4929	0.4253	0.52453	0.41211	0.42835
	204	0.06106	0.99848	0.04591	0.97623	1.05954	0.62426	0.78007	0.68146	0.62426	0.58786	0.54981	0.48798	0.4691	0.39886	0.49105	0.38745	0.40086
	205	0.05322	1.00816	0.04213	0.98503	1.06138	0.60494	0.75891	0.66061	0.60494	0.56511	0.53074	0.47026	0.44963	0.37982	0.46567	0.36536	0.38114
	206	0.04793	1.01098	0.03865	0.98167	1.05891	0.58851	0.7429	0.64412	0.58851	0.54985	0.51518	0.45187	0.43094	0.36037	0.44403	0.35097	0.36398
	207	0.04488	1.00068	0.03428	0.96612	1.04556	0.57634	0.7328	0.63175	0.57634	0.53682	0.50055	0.44056	0.41878	0.3458	0.42621	0.33744	0.34919
	208	0.042	0.97848	0.03319	0.94682	1.02048	0.56535	0.71918	0.62265	0.56535	0.52597	0.49168	0.42799	0.40543	0.33487	0.41134	0.32789	0.33829
	209	0.04049	0.95153	0.03328	0.9152	0.99202	0.55583	0.71244	0.61408	0.55583	0.51746	0.48335	0.42053	0.39467	0.32518	0.39662	0.31845	0.32681
	210	0.03898	0.89882	0.03112	0.86257	0.9378	0.54814	0.70422	0.60594	0.54814	0.5074	0.47453	0.41094	0.38498	0.31551	0.38349	0.31003	0.31964
	211	0.03772	0.82884	0.03197	0.79196	0.86656	0.54167	0.69695	0.59885	0.54167	0.50243	0.46599	0.40323	0.375	0.30679	0.37281	0.30327	0.30946
	212	0.03703	0.75133	0.02938	0.7093	0.78836	0.5374	0.69258	0.59381	0.5374	0.49623	0.45998	0.3973	0.36625	0.29729	0.36072	0.29413	0.30205
	213	0.03832	0.66801	0.03043	0.63273	0.70633	0.53434	0.6873	0.59096	0.53434	0.49036	0.45451	0.38938	0.35789	0.28851	0.34938	0.28722	0.29351
	214	0.03887	0.58327	0.03132	0.55465	0.62214	0.52998	0.68163	0.58958	0.52998	0.48517	0.44947	0.38148	0.34915	0.27866	0.34051	0.28098	0.28458
	215	0.0385	0.49594	0.03095	0.46656	0.53444	0.52754	0.67694	0.58507	0.52754	0.48211	0.44315	0.37458	0.34056	0.26889	0.32904	0.27258	0.27552
	216	0.03935	0.40428	0.03256	0.37842	0.44363	0.52406	0.67408	0.58302	0.52406	0.47639	0.43747	0.36653	0.3308	0.26183	0.31846	0.26378	0.26787
	217	0.04063	0.32869	0.03365	0.30371	0.36932	0.52164	0.66932	0.58125	0.52164	0.47293	0.43242	0.35852	0.32228	0.25129	0.30683	0.25461	0.25898
	218	0.04081	0.26808	0.03405	0.24896	0.30889	0.51742	0.66294	0.57532	0.51742	0.46524	0.42459	0.34947	0.31188	0.24199	0.29676	0.24713	0.25148
	219	0.04225	0.22755	0.03662	0.20908	0.2698	0.51356	0.6559	0.57265	0.51356	0.46009	0.41725	0.34071	0.3022	0.23339	0.28552	0.23654	0.24269
	220	0.04389	0.19434	0.03691	0.17878	0.23823	0.50712	0.64832	0.56667	0.50712	0.45432	0.40893	0.33303	0.29315	0.22471	0.27543	0.22823	0.23291
	221	0.04468	0.16933	0.03918	0.15489	0.21401	0.49871	0.63694	0.55999	0.49871	0.44423	0.39999	0.32266	0.28312	0.21629	0.26585	0.22106	0.22253
	222	0.04612	0.15117	0.04082	0.13864	0.19729	0.49102	0.62799	0.54923	0.49102	0.43566	0.39092	0.31258	0.27417	0.20689	0.25627	0.21161	0.21468
	223	0.04768	0.13988	0.04244	0.12513	0.18756	0.48005	0.61257	0.53773	0.48005	0.42555	0.38104	0.30421	0.26566	0.19791	0.24565	0.20291	0.2064
	224	0.05057	0.13273	0.04403	0.11861	0.1833	0.46979	0.59801	0.52645	0.46979	0.41414	0.36931	0.29332	0.25656	0.19086	0.23604	0.1959	0.1976
	225	0.05153	0.12815	0.04526	0.11433	0.17968	0.45657	0.58407	0.51225	0.45657	0.40135	0.3572	0.28316	0.24846	0.18337	0.22649	0.18622	0.18971
	226	0.05196	0.126	0.04749	0.11208	0.17796	0.43933	0.56341	0.49577	0.43933	0.38868	0.34429	0.27272	0.23947	0.17659	0.21763	0.17899	0.18096
	227	0.05333	0.12372	0.04877	0.1117	0.17705	0.42354	0.54405	0.4794	0.42354	0.37395	0.32991	0.26213	0.22904	0.17044	0.20985	0.17267	0.17431
	228	0.05481	0.12675	0.04966	0.11275	0.18156	0.40805	0.52545	0.46165	0.40805	0.3602	0.31832	0.25206	0.22264	0.16334	0.20009	0.16474	0.16676
	229	0.05558	0.12959	0.05122	0.11629	0.18517	0.39202	0.50564	0.4431	0.39202	0.34592	0.30507	0.24171	0.21488	0.15751	0.19287	0.15732	0.16024
	230	0.05633	0.13536	0.05242	0.12197	0.19169	0.37564	0.48543	0.42604	0.37564	0.33245	0.29232	0.23307	0.20789	0.15498	0.18604	0.15162	0.1542
	231	0.05788	0.14221	0.05268	0.12959	0.20009	0.35959	0.46619	0.40923	0.35959	0.31873	0.28056	0.22476	0.20232	0.14949	0.18017	0.14566	0.14866
	232	0.057	0.15002	0.0528	0.13786	0.20702	0.34414	0.44814	0.39245	0.34414	0.30629	0.26964	0.21598	0.19715	0.14735	0.17571	0.1428	0.14201
	233	0.05878	0.16071	0.05342	0.14825	0.21949	0.33312	0.43084	0.37917	0.33312	0.2968	0.26084	0.21053	0.1945	0.14386	0.17036	0.13856	0.13981
	234	0.05883	0.17232	0.05406	0.15979	0.23115	0.32087	0.41505	0.36545	0.32087	0.28762	0.25261	0.2056	0.19173	0.14412	0.16653	0.13633	0.13482
	235	0.05942	0.18392	0.05394	0.17154	0.24334	0.31221	0.40096	0.35504	0.31221	0.27968	0.24608	0.20103	0.18984	0.14356	0.16434	0.13369	0.13312
	236	0.05836	0.19695	0.05267	0.18582	0.25531	0.30253	0.38897	0.34481	0.30253	0.27269	0.2404	0.19878	0.18953	0.14324	0.16369	0.13287	0.13036
	237	0.05896	0.21312	0.05336	0.20149	0.27208	0.29785	0.37775	0.33715	0.29785	0.26851	0.23681	0.19702	0.19028	0.1442	0.16409	0.13214	0.12966
	238	0.05837	0.22817	0.05345	0.21757	0.28654	0.29302	0.36846	0.33075	0.29302	0.26527	0.2347	0.19609	0.19112	0.14855	0.16512	0.1319	0.12917
	239	0.05758	0.24606	0.05233	0.23688	0.30364	0.28937	0.36118	0.32637	0.28937	0.26408	0.23358	0.19778	0.19364	0.15068	0.16772	0.13423	0.1294
	240	0.0563	0.26494	0.05254	0.25597	0.32124	0.28773	0.3545	0.32467	0.28773	0.26321	0.23477	0.20095	0.19659	0.15518	0.17027	0.13517	0.13151
	241	0.05521	0.28366	0.05144	0.27605	0.33887	0.28936	0.35003	0.32342	0.28936	0.26541	0.23572	0.20364	0.20126	0.16083	0.17326	0.13829	0.13359
	242	0.05369	0.3031	0.04982	0.2965	0.35679	0.29135	0.34802	0.32449	0.29135	0.26876	0.24012	0.20885	0.20716	0.16559	0.17967	0.14255	0.13737
	243	0.05316	0.32642	0.04864	0.31919	0.37958	0.29466	0.34583	0.32757	0.29466	0.27313	0.24535	0.21595	0.2141	0.17207	0.18541	0.14736	0.13929
	244	0.05058	0.34719	0.04688	0.34143	0.39777	0.29848	0.34493	0.32842	0.29848	0.27755	0.24974	0.22052	0.2197	0.1791	0.19211	0.15306	0.14449
	245	0.04983	0.37085	0.04507	0.36423	0.42068	0.30516	0.34613	0.33397	0.30516	0.28452	0.25772	0.22936	0.22934	0.18698	0.1992	0.15907	0.1495
	246	0.04854	0.3956	0.04384	0.38756	0.44414	0.31208	0.34781	0.33924	0.31208	0.29201	0.26569	0.2376	0.23878	0.19548	0.20762	0.16588	0.15525
	247	0.0464	0.41584	0.04278	0.41126	0.46224	0.31704	0.3487	0.34307	0.31704	0.29797	0.2726	0.24547	0.24571	0.2046	0.21565	0.17133	0.16109
	248	0.04501	0.43925	0.04045	0.43421	0.48426	0.32494	0.35222	0.34985	0.32494	0.30635	0.28162	0.25543	0.25575	0.21297	0.22489	0.17921	0.16698
	249	0.04328	0.46172	0.03866	0.45694	0.505	0.33258	0.35322	0.35583	0.33258	0.31493	0.29042	0.26469	0.26494	0.22246	0.23197	0.18677	0.17365
	250	0.04067	0.48235	0.0365	0.47765	0.52302	0.3398	0.35552	0.36163	0.3398	0.32186	0.29846	0.27323	0.27365	0.23086	0.24138	0.19509	0.18012
	251	0.03849	0.50428	0.03479	0.49977	0.54277	0.34685	0.35877	0.36755	0.34685	0.33017	0.30763	0.28249	0.28337	0.24049	0.25116	0.20214	0.18793
	252	0.0381	0.52367	0.03252	0.52145	0.56177	0.355	0.36182	0.37385	0.355	0.33867	0.31681	0.29186	0.29255	0.24947	0.26015	0.20997	0.19406
	253	0.03585	0.54264	0.03188	0.54075	0.57849	0.36219	0.36466	0.37831	0.36219	0.34626	0.32553	0.30138	0.30293	0.2589	0.26757	0.21761	0.20039
	254	0.03425	0.56038	0.03097	0.55854	0.59463	0.3676	0.3666	0.38444	0.3676	0.35319	0.332	0.31014	0.31025	0.26696	0.27645	0.22547	0.20656
	255	0.03325	0.57634	0.028	0.5739	0.60959	0.37315	0.37	0.38888	0.37315	0.35932	0.34111	0.31796	0.31895	0.2742	0.28488	0.23201	0.21253
	256	0.02974	0.58809	0.02678	0.58712	0.61783	0.37852	0.37123	0.39209	0.37852	0.36525	0.34605	0.32405	0.32583	0.28146	0.29111	0.23862	0.21806
	257	0.02853	0.59948	0.02554	0.59752	0.62801	0.38303	0.37294	0.39508	0.38303	0.37086	0.353	0.33097	0.33189	0.28804	0.29736	0.24486	0.22327
	258	0.02803	0.60959	0.02468	0.60765	0.63762	0.38759	0.37354	0.39745	0.38759	0.37477	0.35846	0.33733	0.3385	0.29433	0.30358	0.25015	0.22638
	259	0.0253	0.61662	0.02227	0.61563	0.64192	0.38818	0.3736	0.39885	0.38818	0.37726	0.36058	0.34205	0.34273	0.29832	0.30941	0.25443	0.22962
	260	0.02532	0.62392	0.02134	0.62199	0.64924	0.39183	0.37521	0.39949	0.39183	0.38091	0.36518	0.34628	0.34717	0.30253	0.31268	0.25838	0.23368
	261	0.02339	0.62502	0.02026	0.62316	0.64841	0.39105	0.37359	0.39963	0.39105	0.38162	0.36676	0.34782	0.34984	0.3052	0.31577	0.26086	0.23538
	262	0.02264	0.61757	0.01941	0.61845	0.64021	0.39034	0.37264	0.3985	0.39034	0.38123	0.36653	0.34854	0.35016	0.30648	0.31794	0.26263	0.23594
	263	0.02111	0.60602	0.01798	0.60568	0.62713	0.38836	0.37012	0.39564	0.38836	0.37949	0.36569	0.34882	0.35054	0.30613	0.3175	0.26376	0.23607
	264	0.02007	0.58817	0.01678	0.58894	0.60824	0.38559	0.36789	0.39214	0.38559	0.37617	0.36387	0.34787	0.34926	0.30508	0.31757	0.26248	0.23554
	265	0.01921	0.56975	0.01606	0.57056	0.58896	0.38133	0.3642	0.38706	0.38133	0.3729	0.36078	0.34432	0.3461	0.30302	0.31491	0.25992	0.23355
	266	0.01909	0.55124	0.01468	0.55256	0.57033	0.37438	0.35978	0.38203	0.37438	0.36803	0.35559	0.33931	0.34124	0.29966	0.31104	0.25779	0.23131
	267	0.01865	0.53501	0.01441	0.53661	0.55366	0.36906	0.35522	0.37505	0.36906	0.36227	0.35005	0.33442	0.33623	0.29418	0.30604	0.2546	0.22661
	268	0.01811	0.51738	0.01404	0.51806	0.53549	0.35966	0.34847	0.36628	0.35966	0.35228	0.34185	0.3276	0.32917	0.28935	0.30059	0.24948	0.22328
	269	0.01769	0.49243	0.0139	0.49262	0.51012	0.35163	0.34409	0.35822	0.35163	0.34453	0.33382	0.31859	0.32223	0.28118	0.29313	0.24288	0.21773
	270	0.01679	0.45497	0.01326	0.45584	0.47176	0.34037	0.33473	0.34716	0.34037	0.33389	0.32344	0.30871	0.31146	0.2726	0.28383	0.23513	0.2106
	271	0.01699	0.40865	0.01217	0.41019	0.42564	0.3287	0.32691	0.33641	0.3287	0.32186	0.31267	0.29785	0.30065	0.26233	0.27335	0.22808	0.20337
	272	0.01614	0.35793	0.01279	0.36103	0.37407	0.31605	0.31854	0.32251	0.31605	0.30863	0.29972	0.28593	0.28885	0.25269	0.26293	0.21788	0.19455
	273	0.01564	0.3091	0.01278	0.31242	0.32474	0.30147	0.30871	0.30945	0.30147	0.2948	0.28599	0.27225	0.27676	0.24079	0.2526	0.2096	0.18556
	274	0.01639	0.2681	0.01182	0.2695	0.28449	0.28891	0.29969	0.29646	0.28891	0.28211	0.27337	0.26084	0.26301	0.22788	0.23938	0.19885	0.17683
	275	0.01586	0.23002	0.01227	0.23221	0.24588	0.27262	0.28835	0.28169	0.27262	0.26601	0.2574	0.24498	0.24825	0.21565	0.22728	0.18705	0.16678
	276	0.01536	0.19968	0.01178	0.20083	0.21504	0.25678	0.27858	0.26683	0.25678	0.25094	0.24157	0.22968	0.23387	0.20093	0.21427	0.17487	0.15697
	277	0.01614	0.17513	0.01213	0.17704	0.19127	0.24123	0.26872	0.25194	0.24123	0.23522	0.22631	0.21493	0.21773	0.18887	0.20022	0.16408	0.14543
	278	0.01514	0.15314	0.0119	0.15432	0.16828	0.22475	0.25776	0.23649	0.22475	0.21869	0.21027	0.19808	0.20189	0.17369	0.18631	0.15119	0.13472
	279	0.01557	0.13379	0.01277	0.1343	0.14936	0.20802	0.24609	0.2209	0.20802	0.20215	0.1943	0.18403	0.18739	0.1595	0.17193	0.13942	0.12471
	280	0.0159	0.11395	0.01231	0.11417	0.12985	0.19305	0.23655	0.2065	0.19305	0.18674	0.17869	0.16885	0.17142	0.14601	0.1595	0.12721	0.113
	281	0.0161	0.09637	0.01293	0.09705	0.11247	0.17864	0.22714	0.19221	0.17864	0.17162	0.16418	0.15393	0.15807	0.13328	0.14609	0.11532	0.10308
	282	0.01576	0.07822	0.01262	0.07711	0.09398	0.16254	0.21679	0.17741	0.16254	0.15671	0.14859	0.1391	0.14292	0.11963	0.13183	0.10499	0.09376
	283	0.01489	0.06026	0.01205	0.05878	0.07515	0.1482	0.20695	0.16272	0.1482	0.14079	0.13419	0.12454	0.12867	0.10659	0.12052	0.09403	0.08338
	284	0.0166	0.04806	0.01248	0.04437	0.06466	0.13475	0.19883	0.15075	0.13475	0.12867	0.12129	0.11199	0.1152	0.09425	0.10895	0.08369	0.07372
	285	0.01576	0.03659	0.0122	0.03235	0.05235	0.12035	0.18905	0.13747	0.12035	0.11431	0.10794	0.09874	0.10218	0.08246	0.09624	0.07357	0.06538
	286	0.01611	0.02735	0.01295	0.02417	0.04346	0.10839	0.18136	0.12545	0.10839	0.10186	0.0952	0.08673	0.0911	0.07171	0.08587	0.06398	0.05679
	287	0.01521	0.01996	0.0127	0.01648	0.03517	0.09542	0.17299	0.11446	0.09542	0.08945	0.08307	0.07464	0.07976	0.06068	0.07532	0.05519	0.04824
	288	0.01672	0.01586	0.01303	0.00957	0.03258	0.08508	0.16612	0.10375	0.08508	0.0786	0.07304	0.06351	0.06868	0.05075	0.06472	0.04651	0.04105
	289	0.01576	0.01158	0.01369	0.00681	0.02734	0.07441	0.16035	0.09351	0.07441	0.06888	0.06209	0.05438	0.05905	0.04327	0.0561	0.03789	0.03346
	290	0.01512	0.00925	0.01346	0.00456	0.02437	0.06553	0.15424	0.08586	0.06553	0.06015	0.05405	0.04516	0.05063	0.03498	0.0481	0.03216	0.02795
	291	0.01476	0.00749	0.01312	0.00143	0.02225	0.05892	0.14936	0.07965	0.05892	0.05285	0.04754	0.03942	0.0439	0.02913	0.04076	0.02767	0.02356
	292	0.01549	0.00517	0.01313	0.00075	0.02066	0.05336	0.146	0.07328	0.05336	0.04668	0.04148	0.03356	0.03812	0.02401	0.03512	0.02373	0.01914
	293	0.01589	0.00562	0.01357	0.00035	0.02151	0.04975	0.14448	0.06976	0.04975	0.04292	0.03715	0.03069	0.03482	0.02055	0.03182	0.01919	0.01726
	294	0.01507	0.00408	0.01301	-0.00147	0.01915	0.04529	0.14234	0.0667	0.04529	0.03998	0.0342	0.02618	0.03142	0.01651	0.02756	0.0182	0.0141
	295	0.01629	0.00417	0.01306	-0.00148	0.02046	0.04311	0.13982	0.06431	0.04311	0.03675	0.03172	0.02442	0.02913	0.01436	0.02497	0.0158	0.01233
	296	0.01597	0.00317	0.01423	-0.00138	0.01914	0.04162	0.13838	0.06293	0.04162	0.03581	0.02958	0.02234	0.02664	0.0134	0.02297	0.01488	0.01145
	297	0.01546	0.00313	0.01338	-0.00182	0.01859	0.0394	0.13719	0.06141	0.0394	0.03417	0.02868	0.02146	0.02516	0.01196	0.02089	0.01172	0.01011
	298	0.01555	0.00274	0.01271	-0.00163	0.01829	0.03845	0.13596	0.05934	0.03845	0.03312	0.02759	0.02088	0.02433	0.01085	0.01963	0.01206	0.00991
	299	0.01488	0.00284	0.01205	-0.00208	0.01772	0.03797	0.13467	0.05878	0.03797	0.03167	0.02599	0.01832	0.02362	0.00995	0.01912	0.01116	0.01007
	300	0.01522	0.00303	0.01303	-0.00166	0.01825	0.03745	0.1344	0.05812	0.03745	0.03173	0.0267	0.01848	0.02373	0.00984	0.01734	0.01099	0.00891
	301	0.01587	0.00245	0.0117	-0.00303	0.01832	0.03654	0.13279	0.0576	0.03654	0.03105	0.02565	0.01775	0.02279	0.00839	0.01693	0.01013	0.00876
	302	0.01439	0.003	0.01204	-0.00198	0.01739	0.03509	0.12996	0.05558	0.03509	0.02985	0.02396	0.01721	0.02132	0.00875	0.01643	0.00973	0.00845
	303	0.01384	0.00157	0.01254	-0.00167	0.01541	0.03547	0.12728	0.05522	0.03547	0.02909	0.02347	0.01692	0.02005	0.00925	0.0151	0.00928	0.00759
	304	0.01394	0.00248	0.01192	-0.00229	0.01642	0.03553	0.1264	0.05536	0.03553	0.03017	0.02415	0.01692	0.0216	0.0083	0.01466	0.00899	0.00746
	305	0.01345	0.00242	0.01111	-0.0023	0.01587	0.03509	0.12436	0.05475	0.03509	0.02905	0.02342	0.01719	0.01986	0.00758	0.01459	0.00861	0.00739
	306	0.01455	0.00201	0.01067	-0.00157	0.01656	0.03582	0.12331	0.05435	0.03582	0.02996	0.02463	0.01714	0.01993	0.00636	0.01488	0.00946	0.00545
	307	0.01324	0.0021	0.01039	-0.00189	0.01534	0.03525	0.12118	0.05386	0.03525	0.02969	0.02419	0.01718	0.02057	0.00647	0.01322	0.00878	0.00648
	308	0.01266	0.00153	0.01021	-0.00237	0.01419	0.03422	0.11759	0.05232	0.03422	0.02913	0.02349	0.01674	0.01982	0.00632	0.01336	0.00854	0.00503
	309	0.01263	0.00246	0.01128	-0.00156	0.01509	0.03479	0.11442	0.05247	0.03479	0.02921	0.02241	0.01595	0.01956	0.00696	0.01326	0.00816	0.00608
	310	0.01325	0.00283	0.01091	-0.00191	0.01608	0.03462	0.11206	0.05198	0.03462	0.02855	0.02297	0.0156	0.01966	0.0065	0.01192	0.00834	0.00578
	311	0.01104	0.00168	0.00884	-0.00284	0.01272	0.03417	0.10787	0.05092	0.03417	0.02816	0.02214	0.01621	0.01963	0.00461	0.01151	0.00868	0.00521
	312	0.01226	0.00164	0.00907	-0.00244	0.0139	0.03325	0.10427	0.04898	0.03325	0.02838	0.02284	0.01571	0.0184	0.00585	0.01179	0.00804	0.00521
	313	0.0118	0.00269	0.00884	-0.00119	0.01449	0.03392	0.10042	0.04895	0.03392	0.0278	0.02237	0.01573	0.01912	0.00526	0.01219	0.00738	0.00591
	314	0.01215	0.00298	0.00817	-0.00105	0.01513	0.03338	0.09829	0.04759	0.03338	0.02748	0.02195	0.01569	0.01878	0.00475	0.01065	0.00795	0.00464
	315	0.01125	0.00194	0.00691	-0.00256	0.01319	0.03129	0.09333	0.04813	0.03129	0.02674	0.02179	0.01428	0.01827	0.00439	0.0101	0.0068	0.00457
	316	0.01001	0.00144	0.00771	-0.00213	0.01145	0.03051	0.08878	0.04539	0.03051	0.02648	0.02038	0.01445	0.01707	0.0053	0.01044	0.00785	0.00331
	317	0.00964	0.00236	0.00847	-0.00197	0.012	0.03061	0.08532	0.0447	0.03061	0.02491	0.02004	0.01393	0.01752	0.00412	0.00957	0.00763	0.00355
	318	0.0099	0.00167	0.00738	-0.00262	0.01157	0.02934	0.08155	0.04231	0.02934	0.02491	0.01966	0.01326	0.01623	0.00351	0.00956	0.00729	0.00419
	319	0.00924	0.00134	0.00684	-0.00229	0.01058	0.02862	0.07799	0.0418	0.02862	0.02512	0.02008	0.01288	0.01619	0.00403	0.00904	0.00641	0.0043
	320	0.00874	0.00092	0.00689	-0.00257	0.00966	0.02895	0.0732	0.04095	0.02895	0.02397	0.01925	0.01329	0.01686	0.00476	0.00922	0.00573	0.00419
	321	0.00829	0.00141	0.00664	-0.00205	0.0097	0.02858	0.07044	0.03956	0.02858	0.02447	0.01977	0.01272	0.01644	0.00394	0.00936	0.00673	0.00344
	322	0.00828	0.00284	0.00587	-0.00247	0.01112	0.02875	0.06692	0.0393	0.02875	0.0236	0.01977	0.01357	0.01594	0.00387	0.0085	0.00529	0.00382
	323	0.00728	0.00156	0.00654	-0.00152	0.00884	0.02796	0.06285	0.03684	0.02796	0.02331	0.01829	0.01261	0.01538	0.00412	0.00861	0.00572	0.00332
	324	0.00741	0.00197	0.00604	-0.00178	0.00938	0.02714	0.05998	0.03656	0.02714	0.02278	0.0188	0.01285	0.0159	0.00319	0.00785	0.006	0.00303
	325	0.00607	0.00054	0.00556	-0.0028	0.00661	0.02562	0.05512	0.03368	0.02562	0.02148	0.01788	0.01131	0.01418	0.00296	0.00803	0.00535	0.00323
	326	0.00739	0.00252	0.00498	-0.0017	0.00991	0.02561	0.05367	0.03446	0.02561	0.02191	0.01853	0.01239	0.01468	0.00282	0.00802	0.00552	0.00343
	327	0.00527	0.00077	0.00564	-0.00143	0.00604	0.02432	0.04842	0.03116	0.02432	0.01993	0.01645	0.01054	0.01389	0.00258	0.00796	0.0053	0.00293
	328	0.00582	0.00183	0.0053	-0.00167	0.00765	0.02377	0.04742	0.03076	0.02377	0.0205	0.01752	0.01156	0.01391	0.00264	0.006	0.00437	0.0036
	329	0.00596	0.00156	0.00524	-0.00109	0.00752	0.0234	0.04518	0.03047	0.0234	0.02075	0.01765	0.01114	0.01366	0.00385	0.00686	0.00515	0.00283
	330	0.00564	0.00143	0.00449	-0.00112	0.00707	0.02264	0.04243	0.02928	0.02264	0.01941	0.01625	0.01051	0.01415	0.00266	0.00644	0.00517	0.00299
	331	0.00686	0.00231	0.00396	-0.00092	0.00917	0.02292	0.04094	0.02939	0.02292	0.01954	0.01729	0.01132	0.01417	0.00256	0.00664	0.005	0.00145
	332	0.00375	0.00185	0.0036	-0.00135	0.0056	0.02184	0.03818	0.02683	0.02184	0.01784	0.01592	0.01128	0.01203	0.00199	0.00719	0.00561	0.00177
	333	0.00507	0.00181	0.0043	-0.00072	0.00688	0.01975	0.03584	0.02547	0.01975	0.01792	0.01536	0.01038	0.01218	0.00218	0.00728	0.00346	0.00245
	334	0.00428	0.00262	0.00324	-0.00143	0.0069	0.01904	0.03395	0.02427	0.01904	0.01655	0.01477	0.00964	0.01334	0.00204	0.00679	0.00478	0.00261
	335	0.00392	0.00092	0.00268	-0.00176	0.00484	0.01816	0.03218	0.02347	0.01816	0.01612	0.01386	0.00922	0.01103	0.00113	0.00662	0.00391	0.00304
	336	0.00442	0.00212	0.00322	-0.00064	0.00654	0.019	0.03135	0.02262	0.019	0.01694	0.01355	0.00833	0.01143	0.00168	0.00609	0.00445	0.00204
	337	0.00373	0.00123	0.00228	-0.00159	0.00496	0.01804	0.02935	0.0217	0.01804	0.0154	0.01317	0.00849	0.01181	0.00185	0.00607	0.00341	0.00212
	338	0.00299	0.00166	0.00237	-0.00158	0.00465	0.01621	0.02778	0.02021	0.01621	0.01479	0.01185	0.00734	0.01076	0.00151	0.00573	0.00271	0.00216
	339	0.00222	0.0005	0.00175	-0.0012	0.00272	0.01415	0.02562	0.019	0.01415	0.01396	0.01155	0.00724	0.01018	0.00217	0.00555	0.00342	0.00085
	340	0.00338	0.00104	0.00205	-0.00099	0.00442	0.01571	0.02526	0.01972	0.01571	0.01402	0.01185	0.00765	0.01151	0.00133	0.00539	0.00419	0.00164
	341	0.00351	0.00181	0.00147	-0.00206	0.00532	0.01654	0.0254	0.01886	0.01654	0.01516	0.01293	0.00842	0.01117	0.00053	0.0043	0.0023	0.00078
	342	0.00251	0.00062	0.00148	-0.0014	0.00313	0.01449	0.02277	0.0159	0.01449	0.01188	0.01095	0.00654	0.00917	0.00111	0.00509	0.00318	0.00161
	343	0.00216	0.0016	0.00156	-0.00229	0.00376	0.01463	0.02176	0.01657	0.01463	0.01243	0.01174	0.00738	0.00877	0.00086	0.00477	0.00271	0.00124
	344	0.00232	0.0016	0.00146	-0.00161	0.00392	0.01329	0.02136	0.01587	0.01329	0.01218	0.01159	0.0069	0.00936	-0.00019	0.00282	0.00402	0.00117
	345	0.00222	0.00168	0.00104	-0.00146	0.0039	0.01182	0.02081	0.01494	0.01182	0.01108	0.01146	0.00688	0.00958	0.00013	0.00466	0.00235	0.0013
	346	0.00196	0.00153	0.00111	-0.00184	0.00349	0.01209	0.01995	0.01447	0.01209	0.01147	0.01002	0.00719	0.00919	0.00043	0.00551	0.00243	0.00075
	347	0.0026	0.00222	0.00125	-0.0023	0.00482	0.01266	0.02021	0.0134	0.01266	0.01054	0.00999	0.00576	0.00994	0.0008	0.00394	0.00315	0.00104
	348	0.00209	0.00089	0.00119	-0.00118	0.00298	0.01042	0.01846	0.01267	0.01042	0.01001	0.01025	0.00528	0.00812	0.00059	0.00451	0.00287	0.00044
	349	0.0017	0.00241	0.0012	-0.00092	0.00411	0.01089	0.01823	0.01378	0.01089	0.01149	0.01013	0.00694	0.00896	0.00047	0.0034	0.00242	0.00104
	350	0.00141	0.0009	0.0016	-0.00114	0.00231	0.0103	0.01769	0.01283	0.0103	0.01008	0.00895	0.00583	0.00812	-4e-05	0.00412	0.00222	0.00049
	351	0.00089	0.00168	3e-05	-0.00205	0.00257	0.00997	0.01718	0.01201	0.00997	0.00927	0.00911	0.00566	0.00761	-0.00018	0.00282	0.00148	0.00213
	352	0.00144	0.00145	0.00148	-0.0009	0.00289	0.00912	0.01724	0.01193	0.00912	0.00785	0.00829	0.00486	0.00801	0.0005	0.00356	0.00182	0.00064
	353	0.00156	0.00124	0.00029	-0.00134	0.0028	0.00924	0.01626	0.01129	0.00924	0.00856	0.00872	0.00584	0.00758	0.00026	0.00446	0.00196	-0.0001
	354	0.00167	0.00138	0.00082	-0.00125	0.00305	0.00873	0.01604	0.00988	0.00873	0.00804	0.0071	0.00512	0.00802	-0.00044	0.00322	0.00234	0.00036
	355	-1e-05	9e-05	-0.00051	-0.00173	8e-05	0.00691	0.01384	0.00953	0.00691	0.00552	0.00701	0.00322	0.00569	-0.00098	0.00444	0.00122	0.0002
	356	0.00128	0.00148	0.0006	-0.00151	0.00276	0.00694	0.01367	0.00961	0.00694	0.00612	0.00749	0.00409	0.00673	-1e-05	0.00469	0.00252	0.00122
	357	0.00164	0.00164	0.00081	-0.00111	0.00328	0.00747	0.0144	0.00861	0.00747	0.00728	0.0075	0.00368	0.00663	0.00019	0.00321	0.00254	0.00049
	358	0.00151	0.00076	-0.00079	-0.0016	0.00227	0.00618	0.01302	0.00826	0.00618	0.00617	0.00641	0.00346	0.00663	-0.00033	0.00205	0.00287	0.00026
	359	0.00088	0.00102	-0.00039	-0.00139	0.0019	0.00615	0.01277	0.00761	0.00615	0.00665	0.0064	0.00324	0.00612	-0.00063	0.00341	0.00098	0.00029
	360	0.00034	0.00068	0.00039	-0.00155	0.00102	0.0061	0.01274	0.00868	0.0061	0.00543	0.0044	0.00253	0.00713	-0.00059	0.00251	0.00195	0.00103
	361	-6e-05	0.00181	-0.00073	-0.00184	0.00175	0.00576	0.01283	0.00771	0.00576	0.00619	0.00653	0.00357	0.00601	-0.0006	0.00314	0.00219	0.00071
	362	-0.00065	0.00042	-0.00036	-0.00135	-0.00023	0.00553	0.01092	0.00579	0.00553	0.00462	0.00413	0.00187	0.0046	-0.0002	0.00208	0.00184	0.00084
	363	-0.00018	-0.00042	0.00055	-0.00078	-0.0006	0.00316	0.01056	0.00434	0.00316	0.00358	0.00444	0.00147	0.00459	-0.00095	0.00182	0.0025	-0.00016
	364	0.00063	0.00128	-0.00024	-0.00159	0.00191	0.005	0.01016	0.00703	0.005	0.0046	0.00564	0.00282	0.00546	-0.001	0.00308	0.00123	0.00015
	365	0.00179	0.0015	0.00014	-0.00185	0.00329	0.00471	0.01121	0.00657	0.00471	0.00487	0.00545	0.00309	0.007	-0.00107	0.00305	0.00132	-0.00093
	366	0.00063	0.00167	0.00152	-0.00102	0.0023	0.00433	0.01014	0.00581	0.00433	0.00384	0.00514	0.00188	0.00581	0.00039	0.00349	0.00295	0.00033
	367	0.0004	0.00042	0.00024	-0.00168	0.00082	0.004	0.00914	0.00578	0.004	0.00344	0.00409	0.00194	0.0042	-8e-05	0.00248	0.00096	0.00015
	368	0.00027	0.00133	-0.00145	-0.0021	0.0016	0.00348	0.00992	0.00529	0.00348	0.00432	0.00408	0.00285	0.00498	-0.00103	0.00282	0.00168	-0.00018
	369	0.00103	0.00089	-0.00025	-0.00059	0.00192	0.00398	0.00914	0.00515	0.00398	0.00301	0.00367	0.00275	0.00457	-0.00052	0.00168	0.00225	0.00082
	370	0.00021	0.00054	-9e-05	-0.00122	0.00075	0.00291	0.00903	0.00505	0.00291	0.00309	0.00453	0.00094	0.0044	-1e-05	0.00195	0.00159	-0.00023
	371	-6e-05	0.00102	-0.00021	-0.00167	0.00096	0.00264	0.00932	0.00406	0.00264	0.00342	0.00371	0.00195	0.00549	-0.00069	0.00282	0.00087	-0.00055
	372	0.00027	0.00041	0	-0.00162	0.00068	0.00351	0.00818	0.00494	0.00351	0.00385	0.00456	0.00243	0.00503	-0.00013	0.00277	0.00254	-0.00015
	373	0.00049	0.00103	-4e-05	-0.00087	0.00152	0.00369	0.00786	0.00472	0.00369	0.00285	0.00364	0.00171	0.00427	0.00023	0.00189	0.00242	-0.00022
	374	0.00068	0.00055	0.0002	-0.00077	0.00123	0.00219	0.00839	0.00336	0.00219	0.00318	0.00266	0.00085	0.00454	-0.00061	0.00269	0.00108	0.00027
	375	0.00079	0.00245	0.00011	-0.00106	0.00324	0.00294	0.00759	0.00353	0.00294	0.00321	0.00278	0.00185	0.00484	-0.00044	0.00256	0.00209	0.00018
	376	0.0007	0.00067	0.00045	-2e-05	0.00137	0.00256	0.00679	0.00254	0.00256	0.00234	0.00293	0.00088	0.00385	-0.00032	0.00292	0.00211	0.00205
	377	4e-05	0.00198	-5e-05	-0.00053	0.00202	0.00334	0.0076	0.00344	0.00334	0.00338	0.00369	0.00192	0.00536	-0.00034	0.00105	0.00176	0.00018
	378	0.0005	0.0015	-0.00014	-0.00127	0.002	0.0022	0.00742	0.00292	0.0022	0.0031	0.00345	0.00054	0.00481	-0.00022	0.00219	0.00124	0.00023
	379	0.00085	0.00147	0.00078	-0.00119	0.00232	0.00249	0.00651	0.00398	0.00249	0.0034	0.00426	0.00181	0.0049	-0.00042	0.00112	0.00098	0.00107
	380	0.00102	0.00153	-0.00041	-0.00135	0.00255	0.00177	0.0061	0.00238	0.00177	0.00277	0.00279	0.0015	0.00485	-0.00054	0.00191	0.0021	2e-05
	381	-0.00021	0.0006	-0.00053	-0.00084	0.00039	0.00115	0.0051	0.00222	0.00115	0.00129	0.00223	-0.00013	0.00383	-0.00013	0.00296	0.00197	0.00039
	382	0.00072	0.00194	-5e-05	-0.00085	0.00266	0.00078	0.00615	0.00236	0.00078	0.0021	0.00337	0.00116	0.00386	-0.00087	0.00229	0.00182	0.00039
	383	-0.00044	0.00056	-6e-05	-0.00112	0.00012	0.00142	0.0046	0.00175	0.00142	0.0018	0.00211	0.00068	0.00391	-0.00023	0.00211	0.00176	0.00039
	384	0.00053	0.00188	0.0001	-0.00015	0.00241	0.00117	0.00503	0.00125	0.00117	0.00173	0.00242	0.00052	0.00366	-0.00018	0.00197	0.00043	-0.00087
	385	-0.0002	0.00131	-0.00132	-0.00077	0.00111	-0.0001	0.00523	0.00214	-0.0001	0.00129	0.00193	-0.00025	0.00428	-0.0013	0.00257	0.00187	-0.00025
	386	0.00062	0.00111	5e-05	-0.00054	0.00173	0.00152	0.00406	0.00211	0.00152	0.00176	0.00164	-2e-05	0.00363	-0.0003	0.00176	0.00166	-0.0002
	387	0.00016	0.00184	-0.00017	-0.00076	0.002	0.00128	0.00501	0.00277	0.00128	0.00125	0.002	0.00162	0.00401	-0.00023	0.00219	0.00117	8e-05
	388	0.00049	0.00155	-0.00088	-0.00089	0.00204	0.00125	0.0044	0.00281	0.00125	0.00212	0.00217	0.00108	0.00383	-0.00024	0.00245	0.00154	0.00018
	389	-0.00079	0.00058	-0.00088	-0.00136	-0.00021	-0.00028	0.00428	0.00225	-0.00028	0.00102	0.00106	-0.00083	0.00281	-0.00086	0.00246	8e-05	0.0015
	390	-8e-05	0.00104	-3e-05	-0.00131	0.00096	0.00069	0.00325	0.00117	0.00069	0.00133	0.00134	-0.00057	0.00335	-0.00056	0.00138	0.001	-0.00013
	391	0.00106	0.00078	-0.0009	-0.00144	0.00184	0.00041	0.00338	0.00198	0.00041	0.00136	0.00177	0.0008	0.00389	-0.0008	0.00175	0.00147	0.00138
	392	0.00041	0.00079	-0.00028	-0.001	0.0012	0.00121	0.005	0.002	0.00121	0.00142	0.00234	0.00126	0.00468	-0.00035	0.00203	0.00165	0.00034
	393	0.00052	0.00153	-0.00099	-0.00118	0.00205	-0.00017	0.00248	0.00165	-0.00017	0.00036	0.00101	0.00085	0.00412	-0.00068	0.00132	0.00086	-0.00037
	394	-0.0003	0.00076	-0.00083	-0.00125	0.00046	0.00025	0.00277	0.00238	0.00025	0.002	0.00148	0.00052	0.00301	-0.0007	0.00188	0.0023	0.0003
	395	0.00061	0.00063	-0.00043	-0.00114	0.00124	0.00053	0.0029	0.00141	0.00053	0.00084	0.00248	0.00085	0.00303	-0.00063	0.00131	-0.00022	0.0006
	396	0.0004	0.00109	-4e-05	-0.00087	0.00149	-0.00045	0.00242	0.0001	-0.00045	0.00083	0.00181	-0.00014	0.00356	-0.00023	0.00068	0.00131	0.00075
	397	-0.00014	0.00124	0.00022	-0.00063	0.0011	0.00026	0.00198	0.00139	0.00026	0.00133	0.00135	0.00095	0.00304	-0.00012	0.00211	0.00168	-0.0009
	398	0.00106	0.00148	-0.00155	-0.00126	0.00254	0.00014	0.00206	0.00148	0.00014	0.00098	0.00132	0.00086	0.00306	-0.0008	0.00106	0.00192	0.00028
	399	0.00075	0.00076	0.00034	-0.00091	0.00151	0.00056	0.00244	0.00124	0.00056	0.00072	0.00143	0.00063	0.00299	-0.00068	0.00172	0.00073	-1e-05
	400	0.00031	0.00128	-0.00048	-0.00058	0.00159	-0.00037	0.00149	0.00088	-0.00037	0.00049	0.0015	0.00046	0.00324	9e-05	0.00226	0.00055	0.00019

## Sheet: Table S7
	Table S7. Raw data for free and combined chlorine analysis using DPD colourimetric method (n=3) during reaction Cl/Aden=10, pH4 depicted in Figure 5B.
		Chlorine concentration (µM)
	Time (min)	Free Chlorine	Combined Chlorine
	0	439 ± 11	0
	2	256 ± 10	2.3 ± 9.0
	5	188 ± 8	0
	20	76.9 ± 14.1	49.9 ± 12.2
	30	51.9 ± 3.9	18.7 ± 7.9
	120	59.7 ± 2.1	46.6 ± 8.9
	1080 (18 h)	27.2 ± 0.5	31.5 ± 1.0
	1440 (24 h)	27.5 ± 1.3	42.7 ± 3.2
	2880 (48 h)	15.0 ± 2.9	53.1 ± 3.5
	4320 (72 h)	12.0 ± 1.8	51.6 ± 4.6

## Sheet: Tables S8-S12
	Table S8. Raw data for reaction progress monitoring of reaction Cl/Cyt=10, pH7 depicted in Figure S1B.																			Table S9. Raw data for reaction progress monitoring of reaction Cl/Cyt=10, pH4 depicted in Figure S1C (and A).																			Table S10. Raw data for reaction progress monitoring of reaction Cl/Aden=10, pH7 depicted in Figure S1D.
		Absorbance (A.U.)																			Absorbance (A.U.)																			Absorbance (A.U.)
	Wavelength (nm)	1 mM HOCl Control (t=0 h)	0.1 mM Cytosine Control (t=0 h)	1 mM HOCl Control (t=20 h)	0.1 mM Cytosine Control (t=20 h)	Sum of Controls	2 m	5 m	10 m	20 m	30 m	1 h	2 h	3 h	18 h	24 h	48 h	72 h		Wavelength (nm)	1 mM HOCl Control (t=0 h)	0.1 mM Cytosine Control (t=0 h)	1 mM HOCl Control (t=20 h)	0.1 mM Cytosine Control (t=20 h)	Sum of Controls	2 m	5 m	10 m	20 m	30 m	1 h	2 h	3 h	18 h	24 h	48 h	72 h		Wavelength (nm)	0.5 mM HOCl Control (t=0 h)	0.05 mM Adenine Control (t=0 h)	0.5 mM HOCl Control (t=20 h)	0.5 mM Adenine Control (t=20 h)	Sum of Controls	2 m	5 m	10 m	20 m	30 m
	200	0.44806	2.06186	0.38908	2.06111	2.50992	1.15437	1.02916	0.99878	0.95086	0.93789	0.9225	0.8624	0.8624	0.4863	0.46711	0.42072	0.37583		200	0.24402	1.30341	0.206	1.25532	1.54743	1.36938	1.259	1.20177	1.1983	1.20496	1.2207	1.20079	1.20893	1.21757	1.21004	1.22495	1.18806		200	0.22141	0.93831	0.20121	0.94292	1.15972	0.97194	0.90467	0.78858	0.69317	0.62903
	201	0.39715	1.95638	0.34698	1.94026	2.35353	1.08876	0.98319	0.95295	0.9124	0.90226	0.88227	0.81879	0.81879	0.44319	0.42468	0.3726	0.32835		201	0.19162	1.27447	0.16338	1.23244	1.46609	1.26823	1.17057	1.12075	1.1185	1.12722	1.14162	1.12996	1.13154	1.13463	1.13132	1.13671	1.10846		201	0.19447	0.97584	0.17955	0.98351	1.17031	0.94672	0.88153	0.76547	0.66596	0.59952
	202	0.35685	1.82132	0.31217	1.8004	2.17817	1.03276	0.94116	0.91696	0.88077	0.86778	0.84937	0.78776	0.78776	0.41481	0.39089	0.33946	0.29558		202	0.1578	1.24015	0.13856	1.20313	1.39795	1.1935	1.10753	1.0708	1.07466	1.08248	1.09531	1.08537	1.08693	1.0867	1.07793	1.07996	1.05288		202	0.17255	1.01567	0.16394	1.02264	1.18822	0.92356	0.85672	0.74132	0.64427	0.57656
	203	0.32369	1.68814	0.28082	1.66267	2.01183	0.9903	0.91419	0.89239	0.86007	0.84784	0.82904	0.76808	0.76808	0.38894	0.36811	0.31301	0.2703		203	0.1306	1.20274	0.11802	1.17442	1.33334	1.13805	1.06269	1.03765	1.04207	1.052	1.0675	1.05431	1.05655	1.05414	1.04767	1.04694	1.01845		203	0.15845	1.05134	0.14829	1.05903	1.20979	0.90717	0.84129	0.72888	0.62977	0.56108
	204	0.29083	1.56221	0.25086	1.53576	1.85304	0.95189	0.88598	0.86982	0.84053	0.83346	0.80999	0.75429	0.75429	0.3679	0.3456	0.2901	0.24786		204	0.11191	1.16714	0.10325	1.14088	1.27905	1.0944	1.02813	1.0123	1.02563	1.03587	1.04973	1.03654	1.04264	1.03588	1.0314	1.02913	0.99823		204	0.14272	1.08669	0.13247	1.0943	1.22941	0.88717	0.82569	0.71253	0.61586	0.55098
	205	0.26221	1.45206	0.22481	1.42814	1.71427	0.92118	0.86858	0.85691	0.83039	0.82132	0.8006	0.73899	0.73899	0.35335	0.33181	0.27195	0.23208		205	0.10041	1.13948	0.09366	1.11828	1.23989	1.05773	1.00585	1.00214	1.01562	1.02751	1.04326	1.03202	1.03563	1.0301	1.02372	1.0182	0.989		205	0.12756	1.11433	0.11939	1.12295	1.24189	0.87163	0.81048	0.70182	0.6047	0.54002
	206	0.23696	1.36716	0.20247	1.33464	1.60412	0.89615	0.85456	0.84119	0.82157	0.80985	0.7883	0.72756	0.72756	0.34263	0.31864	0.26041	0.21805		206	0.0903	1.11268	0.08573	1.10027	1.20298	1.03506	0.99106	0.99592	1.01463	1.0246	1.04021	1.03154	1.03545	1.02772	1.02081	1.01326	0.98409		206	0.1162	1.13201	0.10807	1.13994	1.24821	0.85565	0.79556	0.68872	0.59692	0.53139
	207	0.21193	1.29354	0.18105	1.26704	1.50547	0.8783	0.84436	0.83138	0.81337	0.80485	0.78279	0.72103	0.72103	0.33449	0.31034	0.25086	0.20906		207	0.08463	1.09797	0.07858	1.08508	1.1826	1.01846	0.97965	0.98982	1.01625	1.02778	1.04232	1.03729	1.0383	1.02892	1.02391	1.01724	0.98581		207	0.10421	1.13618	0.09811	1.14196	1.24039	0.83487	0.77948	0.67858	0.59121	0.52573
	208	0.18966	1.2348	0.15987	1.21769	1.42446	0.86409	0.83573	0.82771	0.80864	0.79919	0.77664	0.71597	0.71597	0.32754	0.30138	0.24245	0.19925		208	0.07976	1.08123	0.07411	1.07098	1.16099	1.0088	0.9705	0.99117	1.02153	1.03171	1.04882	1.04426	1.04611	1.03596	1.02824	1.01744	0.98893		208	0.09213	1.13002	0.08682	1.1356	1.22215	0.81426	0.76278	0.667	0.58494	0.52259
	209	0.16787	1.19153	0.14007	1.17541	1.3594	0.85311	0.83131	0.82531	0.80533	0.79633	0.77589	0.71389	0.71389	0.3211	0.29411	0.23398	0.19137		209	0.07535	1.06999	0.07242	1.05788	1.14534	1.00001	0.96697	0.98967	1.02438	1.04025	1.05487	1.04649	1.05098	1.04302	1.03546	1.02339	0.99388		209	0.0815	1.11109	0.07765	1.11738	1.19259	0.79477	0.74644	0.65777	0.57914	0.5178
	210	0.14877	1.15326	0.12328	1.13731	1.30203	0.84628	0.82466	0.81983	0.80299	0.7954	0.77469	0.71057	0.71057	0.31352	0.2894	0.22798	0.18631		210	0.07293	1.05077	0.07093	1.04405	1.1237	0.9943	0.96324	0.99103	1.03465	1.04888	1.06341	1.0596	1.06172	1.05348	1.04274	1.02992	0.99962		210	0.07035	1.06394	0.06925	1.06864	1.13429	0.7765	0.72988	0.65065	0.57328	0.5154
	211	0.13061	1.12154	0.10692	1.10819	1.25215	0.83876	0.82284	0.81988	0.80087	0.79474	0.77229	0.71135	0.71135	0.3086	0.28165	0.22087	0.17948		211	0.07192	1.03314	0.06904	1.02767	1.10506	0.99408	0.96189	0.99391	1.04158	1.0567	1.07265	1.06618	1.07261	1.05812	1.05263	1.03591	1.00529		211	0.06215	0.98649	0.06005	0.98761	1.04864	0.75251	0.71167	0.63881	0.56846	0.51364
	212	0.11516	1.09044	0.09227	1.07899	1.2056	0.83464	0.81954	0.81705	0.80139	0.79222	0.77158	0.71076	0.71076	0.30302	0.27692	0.21441	0.1732		212	0.0703	1.01503	0.06825	1.01391	1.08533	0.98867	0.96004	0.99644	1.04859	1.06519	1.0814	1.07588	1.08059	1.06721	1.05717	1.04434	1.01317		212	0.05581	0.89393	0.0513	0.89146	0.94974	0.72592	0.69162	0.62827	0.5627	0.5116
	213	0.10058	1.06069	0.07913	1.04929	1.16127	0.83033	0.81829	0.81655	0.80136	0.79263	0.77242	0.71008	0.71008	0.29594	0.27066	0.20735	0.1666		213	0.0706	0.99002	0.0682	0.98807	1.06062	0.988	0.95875	1.00002	1.0546	1.0723	1.09214	1.084	1.08959	1.07664	1.0677	1.05286	1.01876		213	0.04809	0.79561	0.04441	0.79654	0.8437	0.6978	0.67029	0.61661	0.55819	0.50985
	214	0.0871	1.02468	0.06706	1.01709	1.11178	0.82633	0.81626	0.81499	0.80201	0.79322	0.77171	0.71142	0.71142	0.2907	0.26405	0.20097	0.16159		214	0.07118	0.96469	0.06918	0.9613	1.03587	0.99102	0.95631	1.00473	1.06482	1.08285	1.09843	1.09469	1.09761	1.08385	1.07351	1.0564	1.02717		214	0.04062	0.6915	0.03907	0.69169	0.73212	0.67309	0.64965	0.60499	0.55369	0.50869
	215	0.07615	0.99068	0.05786	0.98801	1.06683	0.8211	0.81513	0.81514	0.80073	0.79354	0.77234	0.71142	0.71142	0.28477	0.25672	0.19405	0.15516		215	0.07142	0.93473	0.07059	0.93127	1.00615	0.9895	0.95565	1.00664	1.07132	1.0921	1.1069	1.1042	1.10562	1.08952	1.08143	1.0637	1.03255		215	0.03579	0.58164	0.03459	0.58071	0.61743	0.64747	0.62988	0.59377	0.54816	0.50666
	216	0.06425	0.95411	0.04722	0.95007	1.01836	0.81481	0.81369	0.81392	0.80138	0.79438	0.77123	0.71341	0.71341	0.27739	0.2481	0.18595	0.14889		216	0.0738	0.89875	0.07066	0.89344	0.97255	0.98719	0.95418	1.01059	1.07723	1.0995	1.116	1.11004	1.11478	1.09568	1.08864	1.07401	1.03714		216	0.02988	0.46237	0.02892	0.45616	0.49225	0.61624	0.60661	0.57878	0.54123	0.50361
	217	0.05541	0.91984	0.03918	0.9157	0.97525	0.81428	0.81525	0.81433	0.80335	0.79595	0.77402	0.71352	0.71352	0.26815	0.24088	0.17967	0.14107		217	0.07422	0.85959	0.07372	0.8565	0.93381	0.98612	0.95344	1.01225	1.08676	1.1095	1.12592	1.12086	1.12514	1.10492	1.09758	1.07543	1.04291		217	0.0257	0.36026	0.02326	0.35449	0.38596	0.58347	0.57986	0.56438	0.53502	0.50037
	218	0.04695	0.88654	0.03134	0.88166	0.93349	0.80707	0.81139	0.81228	0.80213	0.79504	0.77537	0.7117	0.7117	0.26234	0.23401	0.17156	0.13573		218	0.07707	0.8218	0.07541	0.8174	0.89887	0.98594	0.95216	1.01615	1.09422	1.11474	1.13241	1.12764	1.13011	1.10937	1.10088	1.08289	1.04803		218	0.02129	0.28689	0.01958	0.28047	0.30818	0.54378	0.54836	0.54651	0.52599	0.49587
	219	0.04047	0.85797	0.02615	0.8537	0.89844	0.80313	0.80944	0.81247	0.80301	0.79584	0.77567	0.71289	0.71289	0.25451	0.22618	0.16549	0.12993		219	0.08021	0.7803	0.07873	0.77501	0.86051	0.98273	0.952	1.01883	1.10149	1.12531	1.13954	1.13667	1.13901	1.11634	1.10833	1.08758	1.05275		219	0.01839	0.23218	0.01674	0.22708	0.25057	0.50907	0.52072	0.52967	0.51596	0.49256
	220	0.03425	0.83055	0.022	0.82736	0.8648	0.79511	0.80877	0.81123	0.803	0.79619	0.7751	0.71201	0.71201	0.24839	0.2194	0.1576	0.12223		220	0.08165	0.73859	0.08117	0.73423	0.82024	0.97753	0.94801	1.01997	1.10488	1.12872	1.14525	1.14161	1.1452	1.12186	1.11381	1.09034	1.05445		220	0.01486	0.19256	0.01479	0.18927	0.20742	0.48108	0.49636	0.51476	0.50788	0.48869
	221	0.02891	0.80657	0.01728	0.8051	0.83548	0.7912	0.80777	0.8106	0.8032	0.79658	0.77403	0.71181	0.71181	0.24123	0.2097	0.15241	0.11722		221	0.08476	0.69592	0.08411	0.69149	0.78068	0.97065	0.94647	1.02297	1.11086	1.13371	1.15074	1.1468	1.1476	1.12506	1.11816	1.09613	1.06037		221	0.01168	0.16336	0.01126	0.16002	0.17504	0.45547	0.4753	0.50127	0.50062	0.48468
	222	0.02597	0.78809	0.01565	0.78699	0.81406	0.78712	0.80413	0.80814	0.80289	0.79491	0.77246	0.70924	0.70924	0.23435	0.20301	0.14585	0.11179		222	0.08775	0.65682	0.08786	0.65077	0.74457	0.96483	0.94301	1.02558	1.11441	1.13846	1.15605	1.15064	1.15244	1.12862	1.11799	1.09824	1.06215		222	0.01	0.1446	0.00945	0.14213	0.1546	0.42725	0.45247	0.48669	0.49233	0.47839
	223	0.02207	0.76833	0.01273	0.76855	0.7904	0.78257	0.80118	0.80759	0.80071	0.79375	0.77173	0.70773	0.70773	0.22815	0.19805	0.13889	0.10694		223	0.08999	0.61658	0.09035	0.60966	0.70657	0.95645	0.93929	1.02439	1.11814	1.14207	1.15999	1.15265	1.15381	1.13166	1.12178	1.09839	1.06248		223	0.00867	0.13069	0.00822	0.12993	0.13936	0.3995	0.42865	0.47165	0.4826	0.47262
	224	0.0198	0.75215	0.00999	0.75121	0.77195	0.77825	0.79924	0.80471	0.79917	0.79212	0.76898	0.7028	0.7028	0.2219	0.19202	0.13333	0.10136		224	0.09332	0.57777	0.09227	0.56938	0.67109	0.94758	0.93333	1.02358	1.11769	1.14297	1.15994	1.15318	1.15455	1.12933	1.1196	1.09816	1.06019		224	0.00755	0.12518	0.00723	0.12419	0.13273	0.37315	0.40654	0.45497	0.47217	0.46597
	225	0.01704	0.73392	0.00875	0.73374	0.75096	0.77631	0.79786	0.80371	0.79761	0.78896	0.76662	0.69982	0.69982	0.21584	0.18635	0.12886	0.09707		225	0.09683	0.54026	0.09531	0.53118	0.63709	0.93464	0.92711	1.0206	1.11545	1.14081	1.15805	1.15044	1.15183	1.12828	1.11817	1.09868	1.05797		225	0.00566	0.12031	0.00595	0.12085	0.12597	0.35227	0.38959	0.44276	0.46499	0.46097
	226	0.01575	0.7175	0.00839	0.71748	0.73325	0.77289	0.79389	0.79912	0.79219	0.78606	0.76254	0.69501	0.69501	0.21081	0.18002	0.12403	0.09308		226	0.09925	0.50492	0.09821	0.49403	0.60417	0.92116	0.92174	1.01787	1.11316	1.13946	1.15178	1.1487	1.14709	1.12448	1.11547	1.09201	1.05469		226	0.00641	0.12152	0.00582	0.12169	0.12793	0.33614	0.37426	0.43104	0.45539	0.45399
	227	0.01454	0.69833	0.00653	0.69764	0.71287	0.76997	0.79019	0.7928	0.78941	0.7788	0.75714	0.68726	0.68726	0.20507	0.17613	0.11961	0.09058		227	0.10095	0.46985	0.10192	0.45927	0.5708	0.90772	0.91449	1.01295	1.10679	1.13113	1.1484	1.14304	1.14191	1.11863	1.10892	1.0844	1.04651		227	0.00554	0.12502	0.00566	0.12406	0.13056	0.3253	0.36406	0.42207	0.44694	0.44752
	228	0.0127	0.68088	0.00661	0.67893	0.69358	0.76838	0.78574	0.78982	0.7836	0.7748	0.75103	0.68021	0.68021	0.20095	0.17116	0.11527	0.08571		228	0.10285	0.43852	0.10321	0.42695	0.54137	0.89041	0.9044	1.00448	1.09759	1.1229	1.13729	1.13163	1.13296	1.1082	1.09857	1.07666	1.03808		228	0.00447	0.12846	0.00497	0.12839	0.13293	0.31943	0.35784	0.41637	0.44172	0.44265
	229	0.01164	0.66133	0.00572	0.65939	0.67297	0.76439	0.78115	0.78556	0.77837	0.77045	0.7437	0.67485	0.67485	0.19534	0.16722	0.11191	0.08385		229	0.10567	0.41108	0.10563	0.39857	0.51675	0.87461	0.89679	0.99812	1.08835	1.11235	1.12672	1.12105	1.12222	1.09765	1.08823	1.06451	1.02771		229	0.00402	0.13395	0.00378	0.13337	0.13797	0.31641	0.35419	0.41077	0.43577	0.43661
	230	0.01161	0.64309	0.00635	0.64165	0.6547	0.76361	0.77663	0.78015	0.77357	0.76368	0.73742	0.66625	0.66625	0.19178	0.16298	0.10933	0.08104		230	0.10778	0.38556	0.10825	0.37234	0.49334	0.85547	0.88532	0.9868	1.07438	1.09704	1.11198	1.1072	1.10699	1.08534	1.0733	1.0497	1.01333		230	0.00424	0.1417	0.00445	0.14076	0.14594	0.31591	0.35207	0.40691	0.43106	0.43167
	231	0.01215	0.62525	0.00581	0.62114	0.6374	0.76204	0.77287	0.77582	0.76775	0.75873	0.73083	0.65952	0.65952	0.18642	0.15945	0.10596	0.07815		231	0.1089	0.36203	0.11011	0.34896	0.47093	0.83496	0.8731	0.97422	1.05882	1.07888	1.09341	1.08915	1.09057	1.06965	1.0591	1.03515	0.99799		231	0.00484	0.15023	0.00364	0.14947	0.15507	0.31865	0.35197	0.40344	0.42638	0.42646
	232	0.01151	0.60778	0.00544	0.60249	0.61929	0.75934	0.76827	0.77001	0.76048	0.75176	0.72309	0.65145	0.65145	0.18259	0.15588	0.10436	0.07555		232	0.11026	0.3449	0.11111	0.33111	0.45516	0.8164	0.85989	0.95947	1.03937	1.06023	1.07459	1.07225	1.07357	1.04992	1.04144	1.01684	0.97994		232	0.00475	0.1604	0.00369	0.15883	0.16515	0.319	0.3516	0.40012	0.42249	0.42255
	233	0.01035	0.5885	0.00599	0.58454	0.59885	0.75547	0.76285	0.76444	0.75528	0.74593	0.71617	0.64337	0.64337	0.1786	0.15228	0.1029	0.07404		233	0.11146	0.32713	0.11128	0.3144	0.43859	0.7964	0.84501	0.94394	1.01865	1.03824	1.05375	1.04929	1.05153	1.03059	1.01865	0.99656	0.95944		233	0.00406	0.17038	0.00304	0.17003	0.17444	0.32245	0.35264	0.39874	0.4181	0.41715
	234	0.01137	0.57244	0.00739	0.57023	0.58381	0.75485	0.75916	0.761	0.75041	0.74008	0.70978	0.63688	0.63688	0.17628	0.14939	0.09862	0.07254		234	0.11073	0.3138	0.11177	0.30009	0.42453	0.7766	0.83196	0.92597	0.99607	1.01518	1.02868	1.02545	1.02725	1.00782	0.99905	0.97484	0.93725		234	0.00425	0.18283	0.00487	0.18351	0.18708	0.32795	0.35563	0.39747	0.41542	0.4142
	235	0.01238	0.55827	0.00757	0.5521	0.57065	0.7528	0.75537	0.75443	0.74287	0.73406	0.70315	0.62903	0.62903	0.17301	0.14768	0.09815	0.07177		235	0.11108	0.301	0.11172	0.28854	0.41208	0.75628	0.81613	0.90753	0.97267	0.98984	1.00109	0.99979	1.00173	0.98167	0.97339	0.95149	0.91369		235	0.00561	0.19668	0.00478	0.19601	0.20229	0.33279	0.35816	0.39534	0.41138	0.40981
	236	0.01293	0.54184	0.00854	0.53576	0.55477	0.75062	0.75165	0.7503	0.73963	0.72936	0.69705	0.62301	0.62301	0.17056	0.14588	0.09565	0.07009		236	0.11138	0.29208	0.11286	0.27941	0.40346	0.73707	0.80042	0.8879	0.94798	0.96203	0.97427	0.97221	0.97578	0.9567	0.94681	0.92394	0.88803		236	0.00584	0.21128	0.00533	0.21088	0.21712	0.34055	0.36339	0.39631	0.40854	0.4077
	237	0.01301	0.52589	0.00917	0.52082	0.5389	0.75096	0.74936	0.74757	0.73586	0.72593	0.69473	0.61877	0.61877	0.16791	0.14353	0.09465	0.06864		237	0.11037	0.28379	0.11152	0.27144	0.39416	0.7197	0.78492	0.86694	0.92046	0.93371	0.94461	0.94582	0.94721	0.92883	0.91993	0.89778	0.86318		237	0.00574	0.22573	0.00502	0.22654	0.23147	0.34885	0.36896	0.39786	0.40822	0.40523
	238	0.01478	0.513	0.01075	0.50589	0.52778	0.74831	0.74706	0.74456	0.73238	0.72201	0.68909	0.61194	0.61194	0.16626	0.14186	0.09331	0.06818		238	0.11009	0.27771	0.11029	0.26507	0.3878	0.70021	0.76723	0.84382	0.89035	0.90248	0.91348	0.91371	0.91672	0.89879	0.8902	0.86921	0.83412		238	0.00662	0.24232	0.00656	0.24359	0.24894	0.35789	0.37478	0.39886	0.4076	0.40273
	239	0.01561	0.49695	0.01145	0.49064	0.51256	0.74711	0.74521	0.74278	0.73032	0.71912	0.68565	0.60862	0.60862	0.164	0.1397	0.09334	0.06598		239	0.10901	0.27195	0.10917	0.26206	0.38096	0.68197	0.7498	0.81934	0.85853	0.86886	0.87926	0.87908	0.88303	0.86614	0.85626	0.83665	0.80209		239	0.00643	0.26225	0.00599	0.26218	0.26868	0.36892	0.38295	0.40306	0.40829	0.40208
	240	0.01682	0.48361	0.01446	0.47921	0.50043	0.74691	0.74298	0.74155	0.72803	0.71619	0.6827	0.60396	0.60396	0.16392	0.1385	0.09232	0.06637		240	0.10715	0.26891	0.10812	0.25936	0.37606	0.66513	0.73201	0.79619	0.82742	0.83586	0.84668	0.84642	0.84851	0.83323	0.82623	0.80398	0.77074		240	0.00759	0.28031	0.00787	0.283	0.2879	0.38042	0.39186	0.40659	0.40927	0.40302
	241	0.01866	0.47115	0.01579	0.46697	0.48981	0.74534	0.74391	0.74066	0.72734	0.7168	0.68086	0.60199	0.60199	0.16227	0.13807	0.09237	0.06576		241	0.10577	0.26884	0.10634	0.26011	0.37461	0.64856	0.71413	0.7692	0.79472	0.80074	0.81047	0.81136	0.81412	0.79921	0.79099	0.77053	0.73801		241	0.00879	0.3014	0.00834	0.30399	0.31019	0.3939	0.40253	0.413	0.41168	0.40405
	242	0.02051	0.46081	0.0174	0.4562	0.48132	0.74442	0.74241	0.74042	0.72612	0.71538	0.67912	0.59911	0.59911	0.16108	0.13757	0.09181	0.0665		242	0.10317	0.26964	0.10371	0.2611	0.37281	0.63212	0.69544	0.74365	0.75973	0.76374	0.77325	0.77329	0.77768	0.76322	0.75426	0.73786	0.70515		242	0.00958	0.32245	0.00944	0.3259	0.33203	0.40784	0.41414	0.41844	0.41431	0.40614
	243	0.02172	0.45109	0.01932	0.44748	0.47281	0.74308	0.74145	0.74081	0.7245	0.71461	0.6783	0.59712	0.59712	0.16126	0.13695	0.09265	0.06614		243	0.1004	0.27326	0.10172	0.26648	0.37366	0.61529	0.67497	0.71405	0.72322	0.72473	0.73142	0.73403	0.73679	0.72628	0.7179	0.69957	0.66797		243	0.01024	0.34563	0.01063	0.34882	0.35587	0.42388	0.42638	0.42525	0.41926	0.40835
	244	0.02461	0.44461	0.02201	0.43991	0.46922	0.74104	0.74188	0.73922	0.72601	0.71427	0.67836	0.59546	0.59546	0.16025	0.13621	0.09058	0.06652		244	0.0976	0.27832	0.09857	0.27197	0.37592	0.60103	0.65861	0.68814	0.68847	0.68947	0.69489	0.69569	0.70107	0.68909	0.68225	0.66407	0.63228		244	0.01218	0.36919	0.0121	0.37168	0.38137	0.43942	0.43907	0.43474	0.4246	0.41303
	245	0.02756	0.43745	0.02519	0.43469	0.46501	0.7398	0.74201	0.74019	0.72684	0.71376	0.67862	0.59545	0.59545	0.16086	0.13764	0.09123	0.06638		245	0.09552	0.28651	0.09579	0.28145	0.38203	0.5872	0.63882	0.65897	0.65179	0.6509	0.65645	0.65809	0.66166	0.65105	0.64392	0.62722	0.59606		245	0.01346	0.39312	0.01302	0.39649	0.40658	0.45728	0.45367	0.44371	0.43129	0.41699
	246	0.03007	0.43349	0.02817	0.43216	0.46356	0.73969	0.74161	0.74118	0.72584	0.71465	0.67784	0.59444	0.59444	0.16041	0.13778	0.09229	0.06694		246	0.09222	0.29607	0.09249	0.29183	0.38829	0.57384	0.62103	0.63059	0.61632	0.61319	0.61682	0.61928	0.6227	0.61226	0.60447	0.58999	0.56072		246	0.01435	0.4171	0.014	0.42081	0.43145	0.47453	0.46796	0.45383	0.43731	0.42312
	247	0.03398	0.43283	0.0321	0.43263	0.46681	0.73747	0.74157	0.74061	0.72746	0.71587	0.67876	0.59481	0.59481	0.16145	0.13794	0.09291	0.06701		247	0.08811	0.30807	0.08937	0.30431	0.39618	0.56255	0.60354	0.60342	0.58112	0.57721	0.58066	0.5811	0.5846	0.57622	0.5691	0.55351	0.52517		247	0.01645	0.44162	0.01619	0.44635	0.45807	0.49208	0.483	0.46271	0.44379	0.4282
	248	0.03668	0.43314	0.03526	0.43334	0.46982	0.73588	0.74163	0.74266	0.72722	0.71548	0.67832	0.59442	0.59442	0.16195	0.13858	0.09297	0.06748		248	0.08522	0.32111	0.0862	0.31913	0.40633	0.55159	0.58535	0.57679	0.54645	0.53998	0.54297	0.54172	0.5467	0.53799	0.53071	0.51684	0.48879		248	0.01747	0.46659	0.01796	0.47146	0.48406	0.51155	0.49923	0.47365	0.45303	0.43368
	249	0.04072	0.43545	0.03909	0.43578	0.47617	0.73203	0.74033	0.74138	0.72801	0.71662	0.67892	0.59367	0.59367	0.16191	0.13928	0.09366	0.06794		249	0.08109	0.33626	0.08152	0.33571	0.41735	0.54041	0.56747	0.54766	0.51072	0.5029	0.50417	0.50425	0.50702	0.5	0.49216	0.48104	0.45237		249	0.01998	0.49114	0.02066	0.49574	0.51112	0.52846	0.51354	0.48443	0.4601	0.43961
	250	0.04551	0.44049	0.04259	0.4412	0.486	0.72982	0.74104	0.74098	0.72884	0.71731	0.68016	0.5939	0.5939	0.16261	0.14009	0.09525	0.06753		250	0.07781	0.35391	0.07925	0.35443	0.43172	0.53225	0.55186	0.52145	0.47742	0.46658	0.46749	0.46675	0.47026	0.46459	0.45622	0.44644	0.41868		250	0.02262	0.51354	0.0224	0.51889	0.53616	0.54526	0.52773	0.49416	0.46731	0.44617
	251	0.04985	0.4474	0.04832	0.45056	0.49725	0.72674	0.73944	0.74142	0.72801	0.7156	0.67874	0.59205	0.59205	0.16486	0.14105	0.09572	0.06931		251	0.07493	0.37395	0.07601	0.37516	0.44888	0.52357	0.53556	0.49652	0.44395	0.43254	0.4318	0.43075	0.43381	0.42741	0.42051	0.41081	0.38446		251	0.02497	0.53617	0.02566	0.54328	0.56114	0.56026	0.53993	0.50303	0.47214	0.45124
	252	0.05501	0.4569	0.05365	0.46104	0.51191	0.72519	0.73897	0.7419	0.72913	0.71653	0.67988	0.59304	0.59304	0.16549	0.14284	0.09616	0.06979		252	0.07153	0.39385	0.07229	0.39568	0.46538	0.51527	0.52052	0.47144	0.4131	0.39941	0.39799	0.39717	0.39998	0.39203	0.38724	0.37645	0.35127		252	0.02705	0.55761	0.02789	0.56344	0.58466	0.57563	0.55386	0.51312	0.48047	0.45806
	253	0.06018	0.46816	0.05789	0.47353	0.52834	0.72288	0.73776	0.74046	0.72807	0.71682	0.67959	0.59265	0.59265	0.16602	0.14373	0.0979	0.07015		253	0.06783	0.41706	0.06888	0.41986	0.48489	0.50916	0.50556	0.44693	0.38278	0.36851	0.36568	0.36228	0.36542	0.35994	0.35296	0.34446	0.31881		253	0.02988	0.57642	0.02984	0.58229	0.6063	0.58908	0.56475	0.52058	0.4857	0.46269
	254	0.06614	0.48069	0.06467	0.48639	0.54683	0.71978	0.73661	0.74116	0.72892	0.71685	0.67975	0.59229	0.59229	0.16805	0.14507	0.09852	0.07143		254	0.06354	0.44043	0.06545	0.44492	0.50397	0.50356	0.49112	0.4237	0.35527	0.33865	0.33455	0.33167	0.33401	0.32708	0.32178	0.31286	0.28935		254	0.0326	0.59472	0.03379	0.60158	0.62732	0.60169	0.57537	0.52824	0.49184	0.46806
	255	0.07234	0.49502	0.0718	0.50205	0.56736	0.71597	0.73501	0.74071	0.72871	0.71528	0.67914	0.59134	0.59134	0.16904	0.14564	0.09984	0.07188		255	0.0614	0.46753	0.06169	0.47152	0.52893	0.49776	0.47768	0.40302	0.32863	0.31115	0.30681	0.30252	0.30289	0.29665	0.29141	0.28393	0.26067		255	0.03719	0.61115	0.03661	0.6184	0.64834	0.61315	0.58435	0.53487	0.49679	0.47111
	256	0.07921	0.51109	0.07865	0.51847	0.5903	0.7156	0.73493	0.74079	0.72837	0.71597	0.67942	0.59302	0.59302	0.17104	0.14721	0.10031	0.07207		256	0.05852	0.49284	0.05955	0.49946	0.55136	0.49534	0.46376	0.38121	0.30331	0.28507	0.27917	0.27479	0.27492	0.26946	0.26464	0.25632	0.23433		256	0.03969	0.62509	0.04055	0.63241	0.66478	0.62343	0.59377	0.54061	0.50061	0.47529
	257	0.08585	0.52553	0.08445	0.53413	0.61138	0.71155	0.73224	0.73799	0.7265	0.7152	0.67958	0.59132	0.59132	0.17113	0.14862	0.10082	0.07291		257	0.05463	0.52077	0.05585	0.52709	0.5754	0.4906	0.45167	0.36181	0.27991	0.26006	0.25379	0.24894	0.2492	0.2424	0.23817	0.23139	0.20998		257	0.04309	0.63788	0.04275	0.64336	0.68097	0.62897	0.5983	0.54347	0.50152	0.47597
	258	0.09375	0.54333	0.09215	0.55228	0.63708	0.70739	0.73097	0.73745	0.72602	0.71425	0.67776	0.5909	0.5909	0.17236	0.15024	0.10306	0.07421		258	0.05276	0.55019	0.05331	0.55821	0.60295	0.48926	0.44041	0.34333	0.25937	0.23881	0.23128	0.22502	0.22518	0.21851	0.21441	0.20837	0.18682		258	0.04698	0.6499	0.04707	0.6566	0.69688	0.63004	0.60008	0.54412	0.50296	0.47543
	259	0.10158	0.55866	0.10095	0.56786	0.66024	0.70307	0.72875	0.73594	0.72572	0.71275	0.67641	0.58833	0.58833	0.17393	0.15172	0.10378	0.07382		259	0.04978	0.57854	0.05056	0.58663	0.62832	0.48548	0.42966	0.32597	0.23941	0.21878	0.20993	0.20354	0.20357	0.19642	0.19301	0.18699	0.16747		259	0.0514	0.66031	0.05093	0.66751	0.71171	0.63037	0.5994	0.54436	0.50239	0.4756
	260	0.11085	0.5737	0.10972	0.58476	0.68455	0.70057	0.72602	0.73279	0.72292	0.7102	0.67555	0.58857	0.58857	0.17553	0.15234	0.10485	0.07569		260	0.04679	0.60688	0.04754	0.61634	0.65367	0.48391	0.41851	0.31056	0.22346	0.2017	0.19267	0.18569	0.18378	0.17704	0.17338	0.16853	0.1486		260	0.05596	0.66656	0.05609	0.67393	0.72252	0.62714	0.59569	0.54051	0.50052	0.47464
	261	0.11867	0.58831	0.11927	0.60083	0.70698	0.6968	0.72305	0.73107	0.7219	0.70984	0.67438	0.58744	0.58744	0.17737	0.15398	0.10539	0.07544		261	0.04429	0.63459	0.04547	0.64576	0.67888	0.48265	0.40751	0.29492	0.20709	0.18499	0.17509	0.16638	0.16575	0.15975	0.15552	0.15115	0.13151		261	0.05903	0.66578	0.061	0.67388	0.72481	0.62153	0.59059	0.53681	0.4981	0.47227
	262	0.12867	0.60051	0.12784	0.61223	0.72918	0.69324	0.71936	0.72827	0.71868	0.7061	0.67085	0.58458	0.58458	0.17752	0.15451	0.10548	0.07543		262	0.04287	0.6639	0.04296	0.67502	0.70677	0.48185	0.39703	0.28129	0.19188	0.17131	0.16069	0.15132	0.14988	0.14414	0.14077	0.13539	0.11795		262	0.06446	0.65728	0.06491	0.66302	0.72174	0.61283	0.58337	0.53153	0.49254	0.46808
	263	0.13793	0.61356	0.13867	0.6258	0.75149	0.68814	0.71471	0.72319	0.71452	0.70289	0.66796	0.58056	0.58056	0.17797	0.15572	0.10713	0.07659		263	0.04163	0.69178	0.04086	0.70278	0.73341	0.48183	0.38857	0.26882	0.18095	0.15918	0.14853	0.13868	0.13604	0.13088	0.12615	0.12181	0.10411		263	0.06885	0.63804	0.07094	0.64509	0.70689	0.60147	0.57337	0.52276	0.48599	0.46228
	264	0.1487	0.62169	0.14868	0.63276	0.77039	0.68264	0.70926	0.71866	0.70969	0.69863	0.66382	0.57802	0.57802	0.17893	0.15658	0.10766	0.07715		264	0.03861	0.71657	0.03888	0.72936	0.75518	0.48058	0.37889	0.2572	0.1703	0.1485	0.13724	0.12666	0.12405	0.11702	0.11403	0.10964	0.09313		264	0.07526	0.61698	0.07607	0.62104	0.69224	0.5894	0.56232	0.51315	0.47803	0.45526
	265	0.15908	0.62773	0.16036	0.63927	0.78681	0.67738	0.70367	0.71218	0.70417	0.69217	0.65721	0.57414	0.57414	0.17964	0.15687	0.10851	0.0772		265	0.03732	0.74064	0.03761	0.75474	0.77796	0.47959	0.36957	0.24552	0.16044	0.13878	0.12741	0.11646	0.11323	0.10638	0.10375	0.09837	0.08325		265	0.08024	0.58943	0.08139	0.59509	0.66967	0.57414	0.5477	0.50224	0.46865	0.44776
	266	0.17147	0.63176	0.17049	0.64236	0.80323	0.6708	0.69457	0.70589	0.69598	0.68486	0.65053	0.56749	0.56749	0.17943	0.15709	0.10829	0.0773		266	0.03481	0.76364	0.03636	0.77803	0.79845	0.48061	0.36102	0.23519	0.15216	0.13161	0.11914	0.10772	0.10435	0.09655	0.09461	0.0899	0.07347		266	0.08612	0.56743	0.08715	0.57142	0.65355	0.55389	0.5296	0.48766	0.45714	0.43709
	267	0.18237	0.63311	0.18251	0.64419	0.81548	0.66377	0.68771	0.69701	0.68815	0.67697	0.64352	0.5618	0.5618	0.17947	0.15769	0.10886	0.07732		267	0.03453	0.78197	0.03492	0.79824	0.8165	0.47932	0.35198	0.2247	0.1437	0.12386	0.112	0.09987	0.09558	0.08796	0.08604	0.08207	0.06634		267	0.09221	0.54918	0.09347	0.5536	0.64139	0.53149	0.50987	0.4731	0.44461	0.42776
	268	0.19231	0.6306	0.194	0.64176	0.82291	0.65528	0.67665	0.68596	0.67641	0.66524	0.63389	0.55283	0.55283	0.17848	0.15683	0.10812	0.07662		268	0.03351	0.79991	0.034	0.81544	0.83342	0.48003	0.3441	0.21576	0.13727	0.11856	0.10565	0.0928	0.08838	0.08098	0.07881	0.07546	0.06041		268	0.09771	0.52963	0.09904	0.53484	0.62734	0.50468	0.48662	0.45408	0.43046	0.4147
	269	0.20511	0.6238	0.20605	0.63507	0.82891	0.64616	0.66484	0.67317	0.66534	0.65432	0.62375	0.5441	0.5441	0.17764	0.15665	0.10795	0.0767		269	0.03264	0.81355	0.03359	0.83142	0.84619	0.47834	0.33524	0.20557	0.13061	0.11193	0.09951	0.08651	0.08218	0.07496	0.07224	0.06913	0.05456		269	0.10373	0.49991	0.10557	0.50366	0.60364	0.47544	0.46066	0.43441	0.41434	0.40145
	270	0.21667	0.61405	0.21717	0.62209	0.83072	0.63632	0.65281	0.66002	0.65069	0.64132	0.61035	0.5327	0.5327	0.1764	0.15556	0.10706	0.0757		270	0.03198	0.8228	0.03235	0.84026	0.85478	0.47863	0.32752	0.19836	0.12483	0.10727	0.09569	0.081	0.07569	0.0679	0.0663	0.0629	0.04951		270	0.10949	0.45646	0.11067	0.45725	0.56595	0.44698	0.4346	0.41353	0.3967	0.38674
	271	0.22804	0.59767	0.22966	0.6052	0.82571	0.6258	0.63921	0.64474	0.63632	0.62676	0.59646	0.52216	0.52216	0.17492	0.15392	0.10626	0.07615		271	0.03135	0.82789	0.03198	0.84866	0.85924	0.47796	0.32048	0.1901	0.12054	0.10331	0.09157	0.07687	0.07219	0.06353	0.06181	0.05858	0.04533		271	0.11531	0.39916	0.11801	0.40041	0.51447	0.41751	0.40772	0.39244	0.38084	0.37208
	272	0.23924	0.57849	0.24017	0.58498	0.81773	0.6131	0.62217	0.62776	0.61914	0.60977	0.58055	0.5085	0.5085	0.17143	0.15169	0.10431	0.07465		272	0.03057	0.83119	0.03185	0.85066	0.86176	0.47743	0.31209	0.18305	0.11615	0.1002	0.08762	0.07228	0.06675	0.0588	0.05637	0.05419	0.03982		272	0.1209	0.33678	0.12284	0.33616	0.45768	0.38861	0.3828	0.37077	0.36177	0.35622
	273	0.25117	0.55764	0.25276	0.56415	0.80881	0.60008	0.60475	0.61023	0.60128	0.59113	0.56393	0.4937	0.4937	0.16866	0.14908	0.10358	0.07393		273	0.02951	0.82868	0.0301	0.84826	0.85819	0.47623	0.30411	0.17513	0.11161	0.09671	0.08397	0.06851	0.06306	0.05489	0.05287	0.0514	0.03741		273	0.12728	0.27967	0.12901	0.27959	0.40695	0.36275	0.35883	0.35054	0.34477	0.34059
	274	0.2625	0.53457	0.26354	0.54013	0.79707	0.58602	0.5876	0.59142	0.58072	0.57198	0.54631	0.47862	0.47862	0.16596	0.14646	0.10115	0.07242		274	0.02957	0.82359	0.03058	0.84299	0.85316	0.47639	0.29765	0.16879	0.10864	0.09418	0.08079	0.06522	0.05956	0.05106	0.05012	0.04745	0.03521		274	0.13302	0.23191	0.13437	0.23004	0.36493	0.3394	0.33649	0.33211	0.32843	0.32435
	275	0.27308	0.50616	0.27596	0.51149	0.77924	0.57132	0.56689	0.56953	0.56057	0.55087	0.52663	0.46255	0.46255	0.16313	0.14414	0.09934	0.07114		275	0.02857	0.81425	0.02931	0.83496	0.84282	0.47513	0.29024	0.16234	0.10572	0.09201	0.07941	0.0627	0.05738	0.04771	0.04669	0.04385	0.03183		275	0.13761	0.19057	0.14092	0.18933	0.32818	0.31659	0.31583	0.31322	0.31068	0.3088
	276	0.28464	0.47501	0.28648	0.47861	0.75965	0.55639	0.54606	0.54736	0.53758	0.52893	0.50626	0.44473	0.44473	0.15897	0.13958	0.09834	0.07012		276	0.02973	0.8001	0.02896	0.82033	0.82983	0.47408	0.28434	0.15674	0.1032	0.08911	0.07728	0.06076	0.05417	0.045	0.04378	0.04244	0.02898		276	0.14468	0.15927	0.14614	0.15692	0.30395	0.29478	0.29561	0.29526	0.29425	0.29307
	277	0.29436	0.44133	0.29612	0.44142	0.73569	0.53734	0.52359	0.5237	0.51376	0.50517	0.48332	0.42456	0.42456	0.15338	0.1365	0.0947	0.0676		277	0.0291	0.78156	0.03006	0.80341	0.81066	0.47271	0.27834	0.15185	0.10037	0.08788	0.07564	0.05893	0.05232	0.04227	0.04203	0.03987	0.02659		277	0.14877	0.13297	0.15049	0.13124	0.28174	0.27253	0.27384	0.2758	0.27659	0.27482
	278	0.3049	0.40649	0.30629	0.40792	0.71139	0.51998	0.50265	0.50014	0.48957	0.48118	0.46119	0.40559	0.40559	0.14918	0.13126	0.09205	0.06498		278	0.02864	0.76035	0.02966	0.78165	0.78899	0.4706	0.27221	0.14623	0.09727	0.08547	0.07346	0.05551	0.04967	0.04054	0.0391	0.0374	0.02491		278	0.15343	0.11185	0.15643	0.11121	0.26528	0.25329	0.25543	0.25892	0.26001	0.25987
	279	0.31463	0.37385	0.31595	0.37499	0.68848	0.50167	0.47933	0.4762	0.46571	0.45788	0.43843	0.38513	0.38513	0.1439	0.1276	0.08976	0.06291		279	0.02945	0.73369	0.0292	0.75456	0.76314	0.46934	0.26696	0.14141	0.09537	0.08434	0.07178	0.05447	0.04708	0.03779	0.03675	0.03528	0.02372		279	0.15972	0.09379	0.16101	0.0923	0.25351	0.23341	0.23571	0.24089	0.24296	0.2438
	280	0.32398	0.34148	0.32554	0.34208	0.66546	0.48348	0.45547	0.45118	0.4392	0.4333	0.41622	0.36603	0.36603	0.13856	0.12232	0.08603	0.06123		280	0.02901	0.70411	0.02971	0.72576	0.73312	0.46838	0.26236	0.13687	0.09306	0.08235	0.07045	0.05285	0.04602	0.03632	0.03513	0.03289	0.02207		280	0.16416	0.07595	0.16564	0.07457	0.24011	0.21359	0.21777	0.22333	0.22652	0.22778
	281	0.33237	0.30847	0.33343	0.30841	0.64084	0.46427	0.43423	0.42639	0.41618	0.41046	0.39254	0.34733	0.34733	0.13243	0.11759	0.08193	0.05873		281	0.02855	0.67257	0.03076	0.69375	0.70112	0.46688	0.25767	0.13386	0.09194	0.0823	0.06887	0.05201	0.04573	0.03591	0.03481	0.03207	0.02134		281	0.16878	0.06009	0.16961	0.05825	0.22887	0.19595	0.20076	0.20686	0.21155	0.2135
	282	0.3411	0.2704	0.34173	0.27013	0.6115	0.44482	0.41112	0.40343	0.39151	0.38592	0.37004	0.32712	0.32712	0.12765	0.1132	0.07952	0.05606		282	0.02879	0.63811	0.03026	0.65675	0.6669	0.46441	0.2528	0.12973	0.08969	0.08085	0.06808	0.05047	0.04356	0.0345	0.03339	0.03177	0.01914		282	0.17252	0.0439	0.1743	0.04337	0.21642	0.17814	0.18444	0.19154	0.19631	0.19935
	283	0.3474	0.23377	0.3485	0.23067	0.58117	0.42516	0.38772	0.37968	0.3667	0.36189	0.34691	0.30591	0.30591	0.12135	0.10772	0.07657	0.05397		283	0.03002	0.59836	0.02958	0.61705	0.62838	0.46223	0.2483	0.12616	0.08857	0.07893	0.06638	0.04897	0.04228	0.03153	0.0308	0.02965	0.01851		283	0.17665	0.03158	0.17771	0.03005	0.20823	0.1617	0.16721	0.17631	0.18181	0.18445
	284	0.35383	0.19659	0.3557	0.19218	0.55042	0.4062	0.36602	0.35548	0.34445	0.33889	0.32518	0.28794	0.28794	0.11593	0.10297	0.07264	0.05142		284	0.02942	0.55922	0.02972	0.57739	0.58864	0.45833	0.24304	0.12173	0.08582	0.07722	0.06534	0.04678	0.03984	0.03142	0.03087	0.02931	0.01668		284	0.17923	0.02215	0.18135	0.02076	0.20138	0.14735	0.15352	0.16383	0.16843	0.17133
	285	0.35979	0.16122	0.36114	0.1567	0.52101	0.38674	0.34421	0.33412	0.3213	0.31674	0.30399	0.26991	0.26991	0.11024	0.09757	0.06928	0.04973		285	0.02976	0.51617	0.02978	0.53172	0.54593	0.45502	0.23885	0.11922	0.08461	0.07638	0.06477	0.04574	0.03923	0.02965	0.02888	0.02669	0.01668		285	0.18259	0.01466	0.18431	0.01405	0.19725	0.1351	0.141	0.15074	0.15728	0.15959
	286	0.36593	0.13033	0.36664	0.12395	0.49626	0.36777	0.32303	0.31225	0.29955	0.29494	0.28381	0.25157	0.25157	0.10376	0.0921	0.06486	0.04746		286	0.02955	0.47159	0.03016	0.48709	0.50114	0.45129	0.23505	0.11675	0.08399	0.07575	0.06376	0.04558	0.03846	0.02905	0.0274	0.02588	0.01464		286	0.18594	0.01014	0.18655	0.00876	0.19608	0.12298	0.12879	0.13908	0.14472	0.1473
	287	0.36978	0.10486	0.37039	0.09924	0.47464	0.34903	0.30281	0.29196	0.27903	0.27474	0.264	0.23475	0.23475	0.09768	0.08789	0.06156	0.04465		287	0.02904	0.43003	0.02927	0.44349	0.45907	0.44777	0.23184	0.11467	0.08232	0.07471	0.06285	0.04411	0.03806	0.02818	0.02709	0.02616	0.01327		287	0.18738	0.00741	0.18869	0.00598	0.19479	0.11335	0.11975	0.12963	0.13435	0.13598
	288	0.37378	0.08195	0.37419	0.07769	0.45573	0.32993	0.28387	0.27131	0.25967	0.256	0.24533	0.21722	0.21722	0.09183	0.0815	0.05832	0.04238		288	0.03006	0.38904	0.03081	0.40152	0.4191	0.44211	0.22639	0.11194	0.08105	0.07356	0.06265	0.04339	0.03663	0.02764	0.02624	0.02488	0.0134		288	0.18973	0.00418	0.19044	0.00364	0.19391	0.10504	0.11113	0.12007	0.12452	0.1259
	289	0.37697	0.06452	0.37743	0.06143	0.44149	0.31318	0.26626	0.25381	0.24199	0.2383	0.22963	0.20343	0.20343	0.08811	0.0773	0.0546	0.03883		289	0.03004	0.34919	0.03036	0.35964	0.37923	0.43605	0.22198	0.10939	0.07927	0.0735	0.06117	0.04269	0.0359	0.02655	0.02603	0.02447	0.01235		289	0.19096	0.00236	0.19263	0.00345	0.19332	0.09998	0.10365	0.11202	0.11632	0.11755
	290	0.37877	0.0499	0.37951	0.04881	0.42867	0.29548	0.24976	0.23785	0.22693	0.2225	0.21379	0.19025	0.19025	0.08212	0.07223	0.05108	0.03691		290	0.02899	0.3081	0.0307	0.31935	0.33709	0.43018	0.21823	0.10679	0.07845	0.07223	0.05993	0.04183	0.03455	0.02619	0.02537	0.02342	0.01233		290	0.19247	0.00137	0.1938	0.00222	0.19384	0.09438	0.09852	0.10625	0.1102	0.1108
	291	0.37865	0.03985	0.37874	0.03767	0.4185	0.27943	0.23446	0.22177	0.21059	0.20773	0.20007	0.17769	0.17769	0.07616	0.06813	0.04975	0.0351		291	0.02969	0.27051	0.03068	0.27985	0.3002	0.42328	0.21339	0.10306	0.07642	0.07016	0.05806	0.04096	0.03366	0.02549	0.02447	0.0222	0.01139		291	0.19214	0.00077	0.19359	0.00101	0.19291	0.08855	0.09363	0.10068	0.104	0.10496
	292	0.38032	0.0323	0.37927	0.03014	0.41262	0.26251	0.21948	0.20832	0.19686	0.19415	0.18695	0.16516	0.16516	0.0715	0.06497	0.04577	0.0337		292	0.02902	0.22984	0.031	0.23839	0.25886	0.41535	0.20777	0.10025	0.07422	0.06816	0.05733	0.0404	0.03339	0.0247	0.02228	0.0215	0.01175		292	0.19287	0.00133	0.19342	0.00086	0.1942	0.08543	0.08948	0.09656	0.09859	0.10046
	293	0.37893	0.02439	0.37978	0.02363	0.40332	0.24662	0.20575	0.19507	0.18539	0.18219	0.17529	0.15541	0.15541	0.06787	0.06194	0.04383	0.03148		293	0.02929	0.19052	0.03044	0.19516	0.21981	0.40841	0.20344	0.09857	0.0738	0.06644	0.05656	0.04015	0.03321	0.02395	0.02334	0.02085	0.01023		293	0.19237	0.00031	0.19355	0.00072	0.19268	0.08206	0.08632	0.09311	0.09599	0.09683
	294	0.3789	0.01908	0.37663	0.01775	0.39798	0.23211	0.19257	0.18336	0.17465	0.17194	0.16454	0.14608	0.14608	0.06369	0.05794	0.04058	0.02954		294	0.0309	0.15521	0.03039	0.15743	0.18611	0.40047	0.19883	0.0956	0.07103	0.06543	0.05595	0.03886	0.03268	0.02281	0.02216	0.02035	0.01061		294	0.19149	0.00029	0.19237	0.00014	0.19178	0.07999	0.08398	0.09076	0.09371	0.09407
	295	0.37682	0.01601	0.37568	0.01395	0.39283	0.21664	0.18179	0.17319	0.16417	0.16262	0.15581	0.13739	0.13739	0.06016	0.05431	0.03923	0.0279		295	0.03017	0.12078	0.02925	0.12047	0.15095	0.39054	0.19308	0.09184	0.06894	0.06387	0.05446	0.03752	0.03177	0.02229	0.0212	0.02037	0.00956		295	0.1913	0.00041	0.19142	0.0004	0.19171	0.07796	0.08167	0.08738	0.0909	0.0919
	296	0.37253	0.01075	0.37295	0.01147	0.38328	0.20216	0.17162	0.16392	0.15511	0.15291	0.14622	0.12945	0.12945	0.05758	0.05111	0.03641	0.02639		296	0.029	0.09205	0.03046	0.09214	0.12105	0.3811	0.18774	0.08918	0.06735	0.06164	0.05294	0.03587	0.03101	0.0223	0.02056	0.01932	0.00967		296	0.18949	-0.0011	0.18949	0.00104	0.18839	0.07663	0.07973	0.08668	0.08937	0.09062
	297	0.37094	0.00939	0.36799	0.0073	0.38033	0.19097	0.1627	0.1558	0.1482	0.14507	0.14004	0.12357	0.12357	0.0535	0.04857	0.03513	0.02526		297	0.02879	0.06831	0.02903	0.06617	0.0971	0.37229	0.1828	0.08691	0.06584	0.0612	0.05143	0.03649	0.03062	0.02141	0.02132	0.01877	0.00896		297	0.18734	-1e-05	0.18661	-0.00082	0.18733	0.07529	0.07897	0.08539	0.08806	0.08968
	298	0.36614	0.00716	0.36407	0.00651	0.3733	0.18064	0.15446	0.14867	0.1411	0.1391	0.13283	0.11725	0.11725	0.05202	0.04657	0.03287	0.0247		298	0.02847	0.04826	0.02857	0.04811	0.07673	0.36061	0.17623	0.08286	0.06282	0.05889	0.04938	0.03474	0.02847	0.02146	0.0199	0.01885	0.00892		298	0.18536	-0.00036	0.18566	0.00024	0.185	0.0735	0.07862	0.08426	0.08723	0.08858
	299	0.3623	0.00675	0.36015	0.00511	0.36905	0.1697	0.14538	0.1401	0.13343	0.13212	0.12725	0.11096	0.11096	0.04944	0.04411	0.03275	0.02357		299	0.02812	0.03493	0.02928	0.03344	0.06305	0.35132	0.17167	0.08182	0.06179	0.05676	0.0493	0.03436	0.02854	0.02076	0.01978	0.01802	0.00874		299	0.18519	0.00126	0.18345	-0.00045	0.18645	0.07159	0.07595	0.0833	0.08666	0.08764
	300	0.35669	0.00528	0.35434	0.00411	0.36197	0.15963	0.13861	0.1343	0.12794	0.12638	0.12042	0.10682	0.10682	0.04753	0.04276	0.03151	0.02238		300	0.02818	0.02552	0.02811	0.02455	0.0537	0.33933	0.16582	0.07861	0.05932	0.05535	0.04767	0.03356	0.02734	0.02009	0.01925	0.01746	0.00713		300	0.18077	0.00117	0.18075	0.00036	0.18194	0.07075	0.07546	0.08292	0.08534	0.08729
	301	0.35098	0.0044	0.34811	0.00373	0.35538	0.15114	0.13241	0.12775	0.12234	0.11986	0.11591	0.10166	0.10166	0.04641	0.03969	0.02882	0.02057		301	0.02768	0.01868	0.02847	0.01815	0.04636	0.32871	0.16024	0.07679	0.05852	0.05431	0.04618	0.03241	0.02703	0.02021	0.01878	0.01715	0.00832		301	0.17816	0.00087	0.17782	3e-05	0.17903	0.06922	0.07473	0.08192	0.08542	0.08633
	302	0.34376	0.00417	0.34015	0.00288	0.34793	0.14269	0.12502	0.12226	0.11662	0.11415	0.1102	0.09693	0.09693	0.04291	0.03931	0.0274	0.02037		302	0.02732	0.0123	0.02772	0.01257	0.03962	0.31641	0.15456	0.07316	0.05685	0.05194	0.04506	0.03221	0.02682	0.01921	0.01859	0.0167	0.00751		302	0.175	0.00046	0.17416	0.00072	0.17546	0.0675	0.07282	0.07995	0.08357	0.08534
	303	0.33682	0.00368	0.33392	0.00271	0.3405	0.13793	0.12073	0.11783	0.11277	0.11128	0.10625	0.09449	0.09449	0.04216	0.03712	0.02664	0.01953		303	0.02682	0.00848	0.02687	0.00902	0.0353	0.3041	0.14815	0.07126	0.05433	0.05114	0.04354	0.03128	0.02623	0.01846	0.01743	0.01659	0.00653		303	0.17101	6e-05	0.17012	0.00075	0.17107	0.06789	0.07285	0.07973	0.08468	0.08537
	304	0.32928	0.00355	0.32561	0.00222	0.33283	0.13112	0.11589	0.11356	0.10799	0.10651	0.10318	0.09075	0.09075	0.04006	0.03589	0.0257	0.01912		304	0.02577	0.00671	0.02708	0.00736	0.03248	0.29286	0.14266	0.06759	0.05121	0.04774	0.04209	0.02924	0.02577	0.01815	0.01659	0.01611	0.00754		304	0.16783	0.00125	0.16552	0.00041	0.16908	0.06689	0.07133	0.07935	0.08344	0.0851
	305	0.32103	0.00217	0.31765	0.00201	0.3232	0.12496	0.11046	0.1082	0.10366	0.10234	0.09876	0.0873	0.0873	0.03883	0.03427	0.02529	0.01796		305	0.02554	0.00505	0.02524	0.00582	0.03059	0.28264	0.13573	0.06466	0.04927	0.04645	0.04044	0.02945	0.02459	0.01766	0.01816	0.01534	0.0054		305	0.16323	0.0001	0.16194	0.00026	0.16333	0.06557	0.07075	0.07809	0.08288	0.08502
	306	0.31372	0.0023	0.30968	0.00299	0.31602	0.11948	0.1064	0.10339	0.09922	0.09767	0.09387	0.08314	0.08314	0.03765	0.03305	0.0234	0.01775		306	0.02502	0.00313	0.02524	0.00374	0.02815	0.27255	0.13109	0.06128	0.04751	0.04387	0.03915	0.02775	0.02327	0.01674	0.01602	0.01538	0.00509		306	0.15937	0.00068	0.1582	-0.0004	0.16005	0.0635	0.06888	0.07654	0.08203	0.08435
	307	0.30585	0.00251	0.30121	0.00167	0.30836	0.11474	0.10297	0.09983	0.09589	0.09445	0.09111	0.08151	0.08151	0.03613	0.03243	0.02337	0.01741		307	0.02365	0.00228	0.02491	0.00362	0.02593	0.26012	0.12431	0.05803	0.04377	0.04148	0.03663	0.02632	0.02297	0.01665	0.01607	0.01496	0.00535		307	0.15542	6e-05	0.1537	0.00063	0.15548	0.06229	0.06857	0.07711	0.08207	0.08483
	308	0.29632	0.00233	0.2922	0.00232	0.29865	0.11082	0.09821	0.09622	0.09257	0.09037	0.08762	0.07712	0.07712	0.0348	0.03195	0.02245	0.01642		308	0.02348	0.00223	0.02421	0.00416	0.02571	0.24851	0.11942	0.05444	0.04169	0.03937	0.03529	0.02516	0.02206	0.01647	0.01545	0.01478	0.00569		308	0.15116	0.00031	0.14947	0.00025	0.15147	0.06213	0.06706	0.07604	0.08086	0.08267
	309	0.28679	0.00145	0.28382	0.00121	0.28824	0.10508	0.09372	0.09256	0.08831	0.08714	0.08471	0.07538	0.07538	0.03462	0.03	0.02162	0.01609		309	0.02264	0.00144	0.0242	0.00308	0.02408	0.23832	0.11362	0.05171	0.03929	0.03768	0.03367	0.02504	0.02099	0.01527	0.01519	0.01506	0.0051		309	0.14627	0.00032	0.1442	0.00033	0.14659	0.05979	0.06609	0.07454	0.07954	0.08233
	310	0.27693	0.00077	0.27302	0.00119	0.2777	0.09933	0.08878	0.08765	0.08424	0.08235	0.08051	0.07103	0.07103	0.0316	0.02935	0.02138	0.01659		310	0.02258	0.00095	0.02338	0.00325	0.02353	0.22714	0.10758	0.04918	0.03807	0.03559	0.03215	0.02369	0.02049	0.0155	0.01514	0.01416	0.00461		310	0.14016	-0.00019	0.13822	-0.00059	0.13997	0.05838	0.0632	0.07292	0.07894	0.08131
	311	0.2669	0.00143	0.26395	0.00174	0.26833	0.09535	0.08585	0.08384	0.08065	0.07977	0.07695	0.06899	0.06899	0.032	0.02862	0.02141	0.01477		311	0.02177	0.00092	0.02232	0.00213	0.02269	0.21586	0.10138	0.04514	0.03568	0.03341	0.03011	0.02151	0.0194	0.01398	0.01497	0.01378	0.00528		311	0.13567	-0.00065	0.13419	-0.00023	0.13502	0.05798	0.06307	0.07243	0.07702	0.0799
	312	0.25793	0.00119	0.25371	0.00021	0.25912	0.09282	0.08208	0.08093	0.07833	0.07774	0.0755	0.06754	0.06754	0.03061	0.0275	0.01945	0.01434		312	0.02125	0.00157	0.02289	0.00365	0.02282	0.20506	0.09713	0.04443	0.03267	0.03138	0.02905	0.02175	0.01867	0.01437	0.0147	0.01236	0.00383		312	0.13122	-9e-05	0.12847	-0.00118	0.13113	0.0568	0.0621	0.07195	0.07745	0.07941
	313	0.24886	0.00017	0.24467	0.00188	0.24903	0.08753	0.07915	0.0773	0.0743	0.07385	0.0711	0.06419	0.06419	0.03014	0.02781	0.01821	0.01467		313	0.02052	0.00128	0.02091	0.00229	0.0218	0.19564	0.09273	0.04238	0.03225	0.03041	0.02775	0.0216	0.02002	0.0126	0.01342	0.01151	0.00488		313	0.12575	-0.0007	0.12478	0.00074	0.12505	0.05495	0.06115	0.07058	0.07614	0.07881
	314	0.23901	0.00116	0.23399	0.00041	0.24017	0.08229	0.07417	0.07358	0.07025	0.07015	0.06767	0.06121	0.06121	0.02837	0.026	0.01851	0.01468		314	0.0205	0.0011	0.02033	0.00236	0.0216	0.18552	0.08696	0.03847	0.03045	0.02837	0.02648	0.01931	0.01809	0.01354	0.01233	0.01207	0.003		314	0.12152	0.0001	0.11897	-0.00016	0.12162	0.05379	0.05982	0.06875	0.07322	0.07631
	315	0.2307	-0.00023	0.22502	0.00039	0.23047	0.08002	0.07177	0.07107	0.06748	0.06792	0.06622	0.05953	0.05953	0.02786	0.02529	0.01797	0.01332		315	0.01977	0.00136	0.01975	0.00266	0.02113	0.17574	0.08231	0.03765	0.02886	0.02696	0.02548	0.01831	0.01704	0.0116	0.01192	0.01144	0.00366		315	0.11717	-0.0004	0.11395	-0.00027	0.11677	0.05255	0.05832	0.06817	0.07351	0.07613
	316	0.22001	0.00059	0.21588	0.00152	0.2206	0.07528	0.06749	0.06757	0.06442	0.06465	0.06182	0.05581	0.05581	0.02784	0.02459	0.01687	0.01364		316	0.01938	0.00093	0.01891	0.00215	0.02031	0.16621	0.0779	0.03456	0.02648	0.02549	0.02402	0.01775	0.01709	0.01201	0.0114	0.01093	0.00364		316	0.11063	-0.00061	0.109	0.00147	0.11002	0.04979	0.05593	0.06576	0.07118	0.07329
	317	0.20967	9e-05	0.20572	0.00051	0.20976	0.07175	0.06573	0.06431	0.06132	0.06157	0.0608	0.05428	0.05428	0.02653	0.02287	0.016	0.01225		317	0.01775	0.00113	0.01819	0.00227	0.01888	0.15767	0.07381	0.03254	0.02487	0.02382	0.02272	0.0172	0.01591	0.01208	0.01144	0.00966	0.0033		317	0.1064	-0.00051	0.10498	0.00042	0.10589	0.04854	0.05567	0.06373	0.07035	0.07393
	318	0.20063	0.00032	0.19657	-0.00061	0.20095	0.06801	0.06129	0.06099	0.05881	0.05941	0.05701	0.05157	0.05157	0.02456	0.02267	0.01579	0.01274		318	0.01667	0.00103	0.01665	0.00188	0.0177	0.1485	0.06846	0.02967	0.02205	0.02129	0.01972	0.01488	0.01388	0.01144	0.01165	0.00936	0.0029		318	0.10306	-3e-05	0.09879	-0.00013	0.10303	0.04748	0.05266	0.06228	0.06772	0.07075
	319	0.19251	9e-05	0.18691	0.00076	0.1926	0.06356	0.05817	0.05853	0.05538	0.05565	0.05416	0.05028	0.05028	0.02403	0.02251	0.01554	0.01243		319	0.01679	0.00085	0.01683	0.00245	0.01764	0.14123	0.0651	0.02817	0.02148	0.02011	0.02001	0.01529	0.01488	0.01041	0.01169	0.00955	0.00291		319	0.09769	-0.0005	0.09435	0.00043	0.09719	0.04547	0.05071	0.06061	0.06675	0.06933
	320	0.18327	0.0007	0.17831	0.00115	0.18397	0.06186	0.056	0.0556	0.05367	0.05286	0.0517	0.04763	0.04763	0.02364	0.02018	0.01478	0.01047		320	0.01546	0.00031	0.01549	0.0023	0.01577	0.13338	0.06154	0.02577	0.01933	0.01906	0.01879	0.01362	0.01345	0.00979	0.00991	0.00927	0.00273		320	0.09322	-0.00012	0.09015	-0.00041	0.0931	0.04418	0.05035	0.05945	0.06523	0.06807
	321	0.17394	0.00061	0.16884	0.00094	0.17455	0.05716	0.05249	0.05291	0.04988	0.04974	0.04938	0.04502	0.04502	0.02304	0.01998	0.01459	0.01106		321	0.01495	-7e-05	0.01505	0.00218	0.01488	0.12671	0.05757	0.02414	0.01749	0.01696	0.0169	0.014	0.01341	0.00942	0.01021	0.00963	0.00152		321	0.08858	0.0002	0.0855	2e-05	0.08878	0.04198	0.04756	0.05682	0.06345	0.06695
	322	0.16508	0.00035	0.16005	0.00072	0.16543	0.05442	0.05066	0.0503	0.04774	0.04815	0.04731	0.04419	0.04419	0.02261	0.01905	0.01397	0.00985		322	0.01367	0.00034	0.01557	0.00239	0.01401	0.11984	0.05386	0.02246	0.01629	0.01593	0.01613	0.01284	0.01238	0.0089	0.00998	0.00935	0.0028		322	0.08413	-0.00012	0.08158	-3e-05	0.08401	0.04081	0.04625	0.05678	0.06209	0.06465
	323	0.15629	-0.00013	0.15193	0.00104	0.15616	0.05128	0.04726	0.04682	0.04515	0.04501	0.04431	0.04117	0.04117	0.02164	0.0187	0.01424	0.01033		323	0.01275	0.00033	0.01495	0.00296	0.01308	0.11331	0.05036	0.02066	0.0153	0.0141	0.01446	0.01104	0.01116	0.00892	0.01009	0.0086	0.00159		323	0.07921	-0.00081	0.07656	-0.00077	0.0784	0.03927	0.04467	0.05379	0.05965	0.0627
	324	0.14781	0.00032	0.14353	0.0009	0.14813	0.04864	0.04472	0.04507	0.04305	0.04257	0.04245	0.03885	0.03885	0.01998	0.01926	0.01286	0.00949		324	0.01265	0.00089	0.01402	0.00333	0.01354	0.10651	0.04699	0.01788	0.01296	0.01278	0.01392	0.01052	0.01008	0.00883	0.0084	0.00858	0.0012		324	0.07496	-0.00076	0.07154	-1e-05	0.0742	0.03699	0.04347	0.05161	0.05715	0.06176
	325	0.14013	-0.00013	0.13452	0.00064	0.14	0.046	0.04186	0.04212	0.04208	0.04074	0.04062	0.03692	0.03692	0.01861	0.01725	0.01387	0.00927		325	0.0123	0.00164	0.01316	0.00256	0.01394	0.10147	0.04489	0.01759	0.01297	0.01229	0.01382	0.01085	0.00995	0.00757	0.00835	0.0077	0.00119		325	0.07125	-0.00113	0.06739	-0.00055	0.07012	0.03628	0.04219	0.05056	0.05538	0.05849
	326	0.13215	-0.00045	0.12759	0.00112	0.1317	0.04318	0.04113	0.04115	0.0383	0.03886	0.039	0.03565	0.03565	0.01807	0.01696	0.01221	0.0088		326	0.01048	-0.00079	0.01252	0.00275	0.00969	0.09553	0.04242	0.01638	0.01153	0.01205	0.01261	0.00965	0.01005	0.00704	0.00846	0.00658	0.00258		326	0.06659	-0.00084	0.06407	-0.0011	0.06575	0.0348	0.04071	0.04958	0.05511	0.05746
	327	0.12584	0.00012	0.12036	0.00043	0.12596	0.0423	0.03774	0.03846	0.03698	0.03599	0.03699	0.03477	0.03477	0.01717	0.01647	0.0117	0.0078		327	0.01102	0.00082	0.01196	0.00314	0.01184	0.09007	0.03997	0.01545	0.01124	0.0105	0.01163	0.00968	0.00977	0.00732	0.00822	0.00695	0.0009		327	0.06356	-0.00036	0.06104	-0.00034	0.0632	0.0336	0.03861	0.0472	0.05309	0.05606
	328	0.11799	-0.00061	0.1131	0.00054	0.11738	0.03979	0.03693	0.03637	0.03554	0.03478	0.03505	0.03294	0.03294	0.01689	0.01469	0.01126	0.00863		328	0.01152	0.00111	0.01235	0.00332	0.01263	0.08514	0.0376	0.01439	0.01066	0.00964	0.01136	0.00832	0.00851	0.00717	0.00762	0.00724	0.00117		328	0.05972	-0.00079	0.05757	-0.00057	0.05893	0.0329	0.03769	0.04631	0.05215	0.05473
	329	0.11208	0.00126	0.10656	0.00069	0.11334	0.03651	0.03349	0.03501	0.03353	0.03435	0.03327	0.03062	0.03062	0.01521	0.01469	0.01023	0.00812		329	0.011	0.00111	0.01163	0.00384	0.01211	0.07927	0.03542	0.0132	0.00991	0.00957	0.01082	0.00855	0.00909	0.00619	0.00738	0.00596	-0.00073		329	0.05735	-0.00086	0.05493	-0.00093	0.05649	0.03067	0.03573	0.04359	0.04909	0.0509
	330	0.10527	0.00049	0.10132	0.00145	0.10576	0.03435	0.03155	0.03147	0.0302	0.03121	0.03113	0.02917	0.02917	0.01558	0.01299	0.00962	0.00656		330	0.00954	0.0004	0.01081	0.00262	0.00994	0.07483	0.0325	0.01132	0.00843	0.00859	0.00967	0.00764	0.00803	0.00673	0.00695	0.00597	-5e-05		330	0.05356	-0.00065	0.05159	0.00056	0.05291	0.02869	0.03353	0.04161	0.04664	0.04904
	331	0.09826	0.001	0.09348	0.00037	0.09926	0.03221	0.03006	0.02905	0.02964	0.02846	0.0294	0.02685	0.02685	0.01336	0.01294	0.00955	0.00669		331	0.00935	0.0009	0.01079	0.00303	0.01025	0.06971	0.03044	0.01092	0.00749	0.0072	0.009	0.00701	0.00631	0.00583	0.00715	0.0076	-0.00098		331	0.05089	0.00013	0.04685	-0.00149	0.05102	0.0275	0.0325	0.04048	0.04557	0.04765
	332	0.09295	0.0004	0.08897	0.00083	0.09335	0.0306	0.02797	0.02861	0.02727	0.02748	0.02759	0.02602	0.02602	0.01376	0.01239	0.00833	0.0056		332	0.00929	0.00112	0.0107	0.00305	0.01041	0.06578	0.02979	0.01117	0.0078	0.00797	0.00965	0.0077	0.00736	0.006	0.00664	0.00458	9e-05		332	0.04679	-9e-05	0.04403	-7e-05	0.0467	0.02723	0.03136	0.03941	0.04409	0.04592
	333	0.08766	0.00064	0.08228	0.00064	0.0883	0.02857	0.02536	0.02693	0.02505	0.02534	0.02508	0.02427	0.02427	0.01223	0.01204	0.00811	0.00619		333	0.00921	0.0021	0.00975	0.00369	0.01131	0.0607	0.027	0.01009	0.00736	0.00744	0.00862	0.00635	0.00614	0.00581	0.00622	0.00582	0.00021		333	0.04364	-0.00016	0.04192	-0.00025	0.04348	0.02441	0.0289	0.03687	0.04121	0.04318
	334	0.08114	0.00059	0.078	0.00114	0.08173	0.0257	0.02399	0.02497	0.0232	0.023	0.02358	0.0227	0.0227	0.01228	0.01044	0.00903	0.00563		334	0.00822	0.00081	0.00871	0.00336	0.00903	0.05601	0.02387	0.00938	0.0064	0.00672	0.00749	0.00563	0.00612	0.00521	0.00635	0.00428	-0.00083		334	0.0424	-7e-05	0.03872	0.00075	0.04233	0.02392	0.02667	0.03563	0.03905	0.04183
	335	0.07588	0.00013	0.07191	0.00161	0.07601	0.02488	0.0229	0.0242	0.02222	0.02234	0.02298	0.02146	0.02146	0.01191	0.00999	0.0086	0.00528		335	0.00625	-0.00067	0.00907	0.00434	0.00558	0.05313	0.02396	0.0088	0.00617	0.00679	0.00783	0.00517	0.00702	0.00591	0.00527	0.00451	-0.00142		335	0.03849	-0.00027	0.03619	-0.00063	0.03822	0.02235	0.02578	0.03273	0.03789	0.0385
	336	0.07076	0.00039	0.06645	0.00131	0.07115	0.02223	0.02105	0.02199	0.02091	0.02088	0.02042	0.01939	0.01939	0.01136	0.01005	0.0083	0.00712		336	0.0076	0.0017	0.00685	0.00321	0.0093	0.0484	0.02196	0.0078	0.00564	0.00593	0.00766	0.0057	0.006	0.00371	0.00525	0.00507	-3e-05		336	0.03611	-0.00017	0.03339	0.00042	0.03594	0.0205	0.02462	0.03111	0.03528	0.0379
	337	0.06703	0.0016	0.06253	0.00158	0.06863	0.02125	0.02083	0.02195	0.02017	0.02025	0.02178	0.01837	0.01837	0.00986	0.0095	0.00603	0.00514		337	0.00608	0.00055	0.00789	0.0037	0.00663	0.04497	0.01956	0.00768	0.00522	0.00484	0.00626	0.00409	0.00473	0.00441	0.00527	0.00445	-0.00158		337	0.03478	0.00018	0.03188	-0.00071	0.03496	0.02019	0.0247	0.03042	0.03369	0.03634
	338	0.06185	0.00129	0.05812	0.00219	0.06314	0.01975	0.01737	0.0197	0.01845	0.0189	0.01962	0.01822	0.01822	0.01037	0.00972	0.00738	0.0048		338	0.00529	0.00129	0.00599	0.003	0.00658	0.0418	0.01775	0.00698	0.00422	0.00461	0.00601	0.00459	0.00484	0.00368	0.00473	0.0061	-0.00034		338	0.03037	-0.00081	0.0294	7e-05	0.02956	0.01898	0.02284	0.02937	0.03286	0.03393
	339	0.05773	0.00094	0.05287	0.00145	0.05867	0.01858	0.01786	0.01745	0.01742	0.01847	0.01815	0.01739	0.01739	0.00933	0.00817	0.00613	0.00401		339	0.00602	0.00101	0.00637	0.00346	0.00703	0.03876	0.01662	0.00593	0.00378	0.00382	0.00671	0.00473	0.00517	0.00339	0.00467	0.00497	3e-05		339	0.0299	-0.00015	0.02586	-6e-05	0.02975	0.01837	0.02226	0.0275	0.03071	0.03248
	340	0.05289	0.00163	0.04995	0.00095	0.05452	0.01779	0.01689	0.01864	0.01652	0.01768	0.01751	0.01707	0.01707	0.00935	0.00874	0.00609	0.00393		340	0.00627	0.00164	0.00675	0.00378	0.00791	0.03632	0.01658	0.00604	0.00381	0.00484	0.00544	0.00416	0.00521	0.00316	0.00359	0.00339	-0.00018		340	0.02713	0.0001	0.02538	0.00068	0.02723	0.0176	0.02206	0.02715	0.0297	0.03152
	341	0.04855	0.00068	0.04674	0.00191	0.04923	0.01648	0.01579	0.0167	0.01594	0.01658	0.01679	0.01518	0.01518	0.0073	0.00708	0.00426	0.00407		341	0.00453	7e-05	0.00584	0.00345	0.0046	0.03239	0.01509	0.00599	0.00348	0.00409	0.00566	0.00394	0.00432	0.00362	0.00469	0.00426	-0.00019		341	0.0254	-0.00169	0.02326	0.00039	0.02371	0.0174	0.02066	0.02479	0.02785	0.03013
	342	0.04635	0.00141	0.04297	0.00106	0.04776	0.01376	0.01443	0.01439	0.01454	0.01427	0.01466	0.01298	0.01298	0.00663	0.0063	0.00468	0.0038		342	0.003	0.0002	0.00576	0.00348	0.0032	0.03102	0.01284	0.0047	0.00368	0.0032	0.006	0.00332	0.00387	0.00286	0.00436	0.00316	-0.00108		342	0.02277	8e-05	0.02157	-0.00043	0.02285	0.01443	0.01776	0.02277	0.02568	0.02695
	343	0.04246	0.00084	0.03974	0.00116	0.0433	0.01399	0.01241	0.01489	0.01293	0.01448	0.01402	0.01181	0.01181	0.00676	0.00569	0.00545	0.00318		343	0.00416	0.00115	0.0057	0.00409	0.00531	0.02919	0.01277	0.00461	0.00299	0.00338	0.00493	0.00339	0.004	0.00257	0.004	0.00304	-0.00164		343	0.02189	0.0001	0.02053	6e-05	0.02199	0.01556	0.01754	0.02151	0.02488	0.02651
	344	0.03815	0.00053	0.03607	0.00098	0.03868	0.01317	0.01144	0.01244	0.0119	0.01252	0.01335	0.01171	0.01171	0.00495	0.00594	0.00458	0.00288		344	0.00488	0.00187	0.00569	0.00387	0.00675	0.02734	0.01227	0.00456	0.00286	0.00262	0.00451	0.00313	0.00379	0.00372	0.00318	0.00259	-0.0018		344	0.01871	-0.00189	0.01869	0.00019	0.01682	0.01352	0.01562	0.02002	0.02238	0.02386
	345	0.03724	0.00158	0.03363	0.00024	0.03882	0.01134	0.01243	0.01307	0.01184	0.0126	0.01218	0.01078	0.01078	0.00512	0.0049	0.00451	0.00288		345	0.00392	0.00195	0.00421	0.00377	0.00587	0.02498	0.01076	0.00354	0.00299	0.00245	0.00469	0.00292	0.003	0.0027	0.00328	0.0025	-0.00268		345	0.01899	0.00033	0.01625	-0.00103	0.01932	0.01323	0.01509	0.01983	0.02214	0.02362
	346	0.03411	0.00028	0.03086	0.00075	0.03439	0.01165	0.01045	0.01204	0.01097	0.01144	0.01117	0.01009	0.01009	0.00596	0.00565	0.00623	0.00344		346	0.00293	0.00034	0.00507	0.00446	0.00327	0.02413	0.01018	0.00371	0.00246	0.00224	0.00528	0.00294	0.00388	0.00168	0.00326	0.00258	-0.00198		346	0.01797	-0.00109	0.01494	-0.00177	0.01688	0.01202	0.01403	0.01846	0.0202	0.02224
	347	0.03276	0.00105	0.02853	-0.00016	0.03381	0.01022	0.00962	0.0109	0.01015	0.00976	0.01032	0.0081	0.0081	0.00418	0.00427	0.00302	0.0012		347	0.00383	0.00128	0.00409	0.00368	0.00511	0.02236	0.00992	0.00391	0.00218	0.00257	0.00458	0.00364	0.00369	0.00173	0.00336	0.00226	-0.00088		347	0.01717	0.00043	0.01363	-0.00141	0.0176	0.01063	0.01323	0.01763	0.0193	0.02024
	348	0.02854	0.001	0.0257	0.00121	0.02954	0.00834	0.00881	0.00996	0.00801	0.00873	0.00884	0.00806	0.00806	0.00369	0.0039	0.00374	0.00201		348	0.00275	0.00145	0.00402	0.00282	0.0042	0.01928	0.00977	0.00239	0.00075	0.00181	0.00369	0.00159	0.00305	0.00223	0.00353	0.00182	-0.00048		348	0.01654	0.00019	0.01263	-3e-05	0.01673	0.01012	0.01233	0.01496	0.01702	0.01886
	349	0.0263	0.00035	0.02392	0.00144	0.02665	0.00824	0.00895	0.00969	0.00886	0.00913	0.00949	0.00883	0.00883	0.00283	0.00431	0.00416	0.00158		349	0.00302	0.00199	0.00435	0.00342	0.00501	0.01954	0.00824	0.00271	0.00161	0.00176	0.00387	0.00275	0.00273	0.00069	0.00305	0.0025	-0.00194		349	0.01247	-0.00114	0.01194	-0.00062	0.01133	0.00983	0.012	0.01549	0.01733	0.01868
	350	0.02484	0.00134	0.02199	0.00105	0.02618	0.00881	0.00827	0.01022	0.00848	0.0083	0.00884	0.00753	0.00753	0.00406	0.00348	0.0029	0.00259		350	0.00407	0.00221	0.00542	0.00477	0.00628	0.01768	0.00866	0.00321	0.00201	0.0021	0.00372	0.00242	0.00348	0.00254	0.00284	0.00263	-0.0012		350	0.01197	-6e-05	0.01131	-0.0005	0.01191	0.00961	0.01194	0.01492	0.0171	0.01799
	351	0.02248	0.00232	0.01993	0.00104	0.0248	0.00781	0.0074	0.00834	0.00838	0.00809	0.00831	0.00698	0.00698	0.00405	0.00376	0.0017	0.00091		351	0.00213	0.00027	0.00479	0.0049	0.0024	0.0159	0.00703	0.00302	0.00107	0.00128	0.00322	0.00193	0.00271	0.00235	0.00378	0.0025	-0.00171		351	0.01151	0.0007	0.01035	0.00031	0.01221	0.00958	0.01157	0.01409	0.01607	0.01598
	352	0.0216	0.00135	0.0184	0.00074	0.02295	0.00693	0.00758	0.00786	0.00746	0.0078	0.00873	0.00707	0.00707	0.00241	0.00273	0.00268	0.00159		352	0.00164	0.00069	0.00411	0.00385	0.00233	0.01498	0.00667	0.00218	0.00135	0.00108	0.00297	0.00256	0.00234	0.00191	0.00329	0.00218	-0.00136		352	0.0109	0.00076	0.00943	-0.00067	0.01166	0.00772	0.01089	0.01318	0.01495	0.01575
	353	0.01918	0.00185	0.01716	0.00108	0.02103	0.00594	0.00591	0.00749	0.00658	0.00627	0.00712	0.00589	0.00589	0.00297	0.00384	0.00226	0.00147		353	0.0014	0.00053	0.00248	0.0033	0.00193	0.01516	0.00766	0.00329	0.00167	0.00265	0.00357	0.00244	0.00227	0.00143	0.00279	0.00198	-0.00189		353	0.01047	-0.00084	0.0089	-0.00027	0.00963	0.00649	0.00976	0.0121	0.01298	0.01503
	354	0.01696	0.00068	0.01614	0.00122	0.01764	0.00592	0.00698	0.00637	0.00616	0.00667	0.00593	0.00574	0.00574	0.00246	0.0026	0.0022	0.00091		354	0.00192	0.00062	0.00407	0.00477	0.00254	0.01296	0.00634	0.00293	0.00074	0.00141	0.00404	0.00206	0.00296	0.00209	0.00351	0.00178	-0.00273		354	0.00966	0.00062	0.00794	9e-05	0.01028	0.00734	0.00832	0.01125	0.01187	0.01326
	355	0.01559	0.00109	0.01538	0.00167	0.01668	0.00638	0.00642	0.00708	0.006	0.0058	0.00666	0.00588	0.00588	0.00339	0.00184	0.00256	-0.00026		355	0.00162	0.00137	0.0032	0.00354	0.00299	0.01316	0.00645	0.00292	0.00159	0.00139	0.00344	0.00248	0.00245	0.00202	0.00245	0.0022	-0.00148		355	0.00817	-0.00166	0.00712	0.00061	0.00651	0.00776	0.00884	0.01196	0.01279	0.01348
	356	0.01494	0.0008	0.01369	0.00032	0.01574	0.00517	0.00528	0.0065	0.00505	0.00581	0.00568	0.00444	0.00444	0.0032	0.00357	0.00132	0.00194		356	0.0012	-3e-05	0.00348	0.0047	0.00117	0.01232	0.00532	0.00235	0.00106	0.00226	0.00339	0.00113	0.00266	0.00108	0.00195	0.00263	-0.00172		356	0.00752	-0.00212	0.00612	0.0008	0.0054	0.00609	0.00771	0.00994	0.01127	0.01122
	357	0.014	0.00126	0.01163	0.00122	0.01526	0.00462	0.00473	0.00604	0.0048	0.00593	0.00603	0.00331	0.00331	0.00228	0.00076	0.00178	0.00145		357	0.00218	0.00168	0.00304	0.00305	0.00386	0.01057	0.00545	0.00201	0.00096	0.00122	0.00218	0.00185	0.00192	0.0016	0.00132	0.00231	-0.00146		357	0.00695	-0.00031	0.0059	0.00011	0.00664	0.00626	0.00788	0.00882	0.01064	0.01163
	358	0.01282	0.00035	0.01116	0.00115	0.01317	0.00382	0.00429	0.00416	0.00429	0.00521	0.00477	0.00432	0.00432	0.00255	0.00133	0.00245	-0.00011		358	0.0005	-0.00059	0.00237	0.00334	-9e-05	0.01012	0.00536	0.00185	0.00122	0.00184	0.00319	0.00273	0.00243	0.00102	0.00185	0.00156	-0.00243		358	0.0058	-1e-05	0.00503	-0.00074	0.00579	0.00611	0.00724	0.00861	0.01058	0.01059
	359	0.01144	0.00035	0.00973	0.0012	0.01179	0.00356	0.00357	0.00463	0.00389	0.00418	0.00411	0.00302	0.00302	0.00282	0.00194	0.00217	0.00062		359	0.00245	0.00119	0.00187	0.00294	0.00364	0.00997	0.00543	0.00201	0.00139	0.00118	0.00318	0.00192	0.00235	0.00012	0.00158	0.00099	-0.00258		359	0.00529	-0.0002	0.00617	0.00016	0.00509	0.00476	0.00656	0.00789	0.00945	0.00952
	360	0.01123	0.00153	0.00879	0.00074	0.01276	0.00392	0.00366	0.00479	0.00377	0.00439	0.00476	0.00328	0.00328	0.00207	0.00086	0.00067	0.00093		360	0.00031	0.00047	0.00314	0.00225	0.00078	0.00825	0.00415	0.00157	0.00098	0.00056	0.00272	0.00112	0.00227	0.0008	0.00255	0.00154	-0.00269		360	0.00553	1e-05	0.00392	-0.00026	0.00554	0.00445	0.00729	0.00828	0.00816	0.0095
	361	0.009	-6e-05	0.00765	0.00103	0.00894	0.00241	0.00396	0.00374	0.00379	0.00343	0.00343	0.00294	0.00294	0.0012	0.00122	0.00211	0.00175		361	0.0028	0.00081	0.00227	0.00306	0.00361	0.00836	0.00359	0.00164	-2e-05	0.00017	0.00218	0.00128	0.00127	0.00014	0.00173	0.00105	-0.00267		361	0.00357	0.00019	0.00397	-0.00047	0.00376	0.0046	0.00599	0.00777	0.00737	0.00869
	362	0.00844	0.00055	0.00726	0.00084	0.00899	0.00349	0.00321	0.00401	0.00359	0.00352	0.00434	0.0032	0.0032	0.00058	0.00126	0.00158	0.0009		362	0.00075	0.00023	0.00199	0.00343	0.00098	0.00722	0.00402	0.00212	0.0009	0.00102	0.00204	0.00213	0.00173	0.00137	0.00255	0.00097	-0.0028		362	0.00462	-0.00078	0.00327	0.00041	0.00384	0.00358	0.0053	0.00771	0.00843	0.00823
	363	0.00766	0.00016	0.00639	0.00037	0.00782	0.00152	0.00298	0.00271	0.00286	0.00336	0.00333	0.00117	0.00117	0.0007	0.0014	0.00245	0.00073		363	0.00154	0.00033	0.00158	0.00244	0.00187	0.00704	0.00316	0.00194	0.00078	0.00065	0.00238	0.00277	0.002	0.00051	-0.0003	0.0027	-0.00149		363	0.00394	-0.0004	0.00407	0.00028	0.00354	0.00395	0.00542	0.00626	0.00748	0.00831
	364	0.00639	-0.0013	0.00594	-0.00054	0.00509	0.00359	0.00353	0.00399	0.00413	0.00394	0.0039	0.00316	0.00316	0.00151	-9e-05	0.001	-8e-05		364	0.00047	-1e-05	0.00314	0.00296	0.00046	0.00615	0.00236	0.00088	-0.00019	0.00027	0.00106	0.00041	0.00107	0.00163	0.00216	0.00014	-0.00163		364	0.00284	-0.00083	0.00253	-0.0002	0.00201	0.00453	0.00505	0.006	0.00705	0.00783
	365	0.007	-0.00126	0.00561	-0.00105	0.00574	0.0023	0.00178	0.00232	0.00206	0.00252	0.00258	0.00111	0.00111	0.00034	0.00047	0.00084	0.00077		365	0.0018	0.00093	0.00262	0.00311	0.00273	0.00534	0.00209	0.00083	-6e-05	0.0009	0.0014	0.00049	0.00097	0.00059	0.00141	0.00155	-0.00107		365	0.00269	-0.00057	0.00155	-0.00094	0.00212	0.00323	0.00455	0.00567	0.00526	0.00647
	366	0.00501	0.00036	0.0057	0.00073	0.00537	0.00216	0.00246	0.00294	0.00325	0.00334	0.00321	0.00197	0.00197	0.00059	0.00202	0.00164	0.00065		366	0.00079	-0.00094	0.00191	0.00205	-0.00015	0.00576	0.00281	0.00159	0.00069	0.00111	0.00148	0.00146	0.00229	0.00051	0.00093	0.00234	-0.00128		366	0.0027	2e-05	0.00211	0.00053	0.00272	0.00312	0.0042	0.00604	0.00656	0.00635
	367	0.00654	-0.00024	0.00393	-0.00067	0.0063	0.0031	0.00299	0.00374	0.00334	0.00346	0.00353	0.00215	0.00215	0.00042	-0.00051	0.00074	0.00058		367	0.00079	0.00035	0.00291	0.00374	0.00114	0.00539	0.00214	0.00032	0.00029	0.00017	0.00137	0.00045	0.00075	0.0018	0.0015	0.00099	-0.00222		367	0.00204	0.00031	0.00104	-0.00081	0.00235	0.00488	0.00522	0.0061	0.00717	0.00665
	368	0.00457	0.00017	0.00327	-0.00018	0.00474	0.00079	0.00129	0.00258	0.00175	0.00147	0.00201	0.00021	0.00021	0.00027	0.00013	0.00153	0.0009		368	0.00186	0.00059	0.00293	0.00227	0.00245	0.00626	0.00203	0.00081	0.00106	0.00041	0.00261	0.00169	0.0027	0.00088	0.00177	0.00138	-0.00208		368	0.00321	-0.00048	0.00074	-0.00071	0.00273	0.00224	0.00298	0.00416	0.0048	0.00573
	369	0.00447	-0.00085	0.0035	-0.00059	0.00362	0.00189	0.00189	0.00216	0.0023	0.00264	0.00266	0.00127	0.00127	0.00107	0.00061	0.0015	0.00019		369	0.00015	-1e-05	0.00171	0.00234	0.00014	0.0047	0.00194	0.00075	-0.00035	0.00039	0.00168	0.0019	0.00095	0.00112	0.00111	-0.00017	-0.00237		369	0.00272	-0.00061	0.00193	-0.00099	0.00211	0.00257	0.00364	0.00463	0.00427	0.00486
	370	0.00448	-0.00027	0.00452	0.00139	0.00421	0.00138	0.00231	0.00284	0.00217	0.00215	0.00267	0.00182	0.00182	0.00125	0.00133	0.00031	0.00019		370	0.00177	0.00015	0.00232	0.00248	0.00192	0.00392	0.00181	0.00182	-0.00016	0.00018	0.00201	0.00089	0.00058	0.0001	0.00139	0.00047	-0.00264		370	0.00212	-0.00061	0.00277	0.00092	0.00151	0.00317	0.00323	0.00501	0.0042	0.0057
	371	0.00535	0.00019	0.00256	-0.00083	0.00554	0.002	0.00152	0.00175	0.00165	0.00297	0.00206	0.00211	0.00211	0.00019	-0.00021	0.00061	-7e-05		371	0.00047	0.00018	0.00217	0.00243	0.00065	0.00255	0.00057	-0.00065	-0.00104	0	0.00156	0.00049	0.00093	0.00098	0.00059	0.00202	-0.00259		371	0.00296	-0.00045	0.00106	-0.00088	0.00251	0.0031	0.00332	0.00434	0.00538	0.00612
	372	0.00417	-0.00015	0.00309	-0.00105	0.00402	0.00107	0.00206	0.0018	0.00285	0.00302	0.00375	0.0018	0.0018	-0.00016	-0.00016	0.00167	-0.00018		372	0.00056	-2e-05	0.00206	0.00248	0.00054	0.0032	0.0025	0.00182	0.00056	0.00063	0.00226	0.00056	0.00181	-4e-05	0.00201	0.0025	-0.00258		372	0.00119	-0.00063	0.00067	-0.0004	0.00056	0.00255	0.00408	0.00444	0.00575	0.00495
	373	0.0042	0.00068	0.00109	-0.0009	0.00488	0.00105	0.00103	0.00205	0.00093	0.00112	0.00215	0.00155	0.00155	-0.00043	0.00076	-0.0002	0.00083		373	0.00104	0.00021	0.00216	0.00303	0.00125	0.00208	0.00018	0.00013	-0.00107	-0.00095	0.00085	-0.00064	6e-05	0.00029	0.00145	0.00097	-0.00106		373	0.00198	0.00083	4e-05	-0.00104	0.00281	0.00185	0.00267	0.00344	0.00354	0.00402
	374	0.00343	0.00124	0.0024	-0.00012	0.00467	0.00146	0.00049	0.00197	0.00077	0.00171	0.00139	0.00046	0.00046	0.00035	0.0012	0.00012	-0.00047		374	0.00018	-0.00065	0.00172	0.00183	-0.00047	0.00329	0.00231	0.00159	0.00034	0.00023	0.0016	0.00103	0.00064	0.00028	0.00099	0.00105	-0.00206		374	0.00118	0.00082	0.00067	-5e-05	0.002	0.00277	0.00278	0.00273	0.00298	0.00402
	375	0.00249	-0.00049	0.00113	-0.00108	0.002	0.00125	0.00086	0.00211	0.00117	0.00133	0.0018	0.00054	0.00054	-0.00111	0.0006	0.00145	0.00013		375	-0.00038	-0.00052	0.00139	0.00177	-0.0009	0.003	0.00189	0.00084	-0.00044	0.00018	0.00129	0.0011	0.0012	-0.00041	0.00236	0.00099	-0.00211		375	0.00169	-0.00073	0.00052	-0.00085	0.00096	0.00239	0.00238	0.0037	0.00384	0.00479
	376	0.00326	0.00077	0.00193	0.00024	0.00403	0.00126	0.00161	0.00189	0.00124	0.0017	0.00128	-0.00019	-0.00019	0.00047	0.00062	0.00082	-7e-05		376	-0.00035	-9e-05	0.00204	0.00295	-0.00044	0.00213	0.00035	0.00061	-0.00101	-0.00037	0.00074	0.00015	0.00074	8e-05	0.00142	0.00051	-0.00305		376	0.00198	0.00106	0.00115	0.00057	0.00304	0.00201	0.00247	0.0026	0.00382	0.00403
	377	0.00253	-0.00013	0.00161	0.00052	0.0024	0.00046	0.00145	0.00182	0.00043	0.00101	0.0014	0.00042	0.00042	-0.00015	0.00017	-5e-05	0.00038		377	0.001	-0.00089	0.00139	0.00279	0.00011	0.00255	0.00102	0.00012	-0.00044	0.00045	0.00178	0.00045	0.0008	0.00085	0.00119	0.00044	-0.00198		377	0.00146	-5e-05	0.00044	3e-05	0.00141	0.00251	0.00213	0.00283	0.00312	0.00398
	378	0.00185	-0.00048	0.00291	0.00043	0.00137	0.00154	0.00107	0.00231	0.00105	0.00126	0.00115	0.00024	0.00024	0.00034	-0.0007	5e-05	0.00018		378	-0.00015	0.00069	0.00135	0.00309	0.00054	0.00123	0.00077	2e-05	0.00013	-0.00139	0.00111	-0.00064	0.00073	0.00017	0.00046	0.00071	-0.00206		378	0.00082	-0.00071	0.00069	0.00041	0.00011	0.00202	0.00334	0.00354	0.00317	0.00361
	379	0.00187	-0.00062	0.00181	9e-05	0.00125	0.00094	0.0008	0.00162	0.00214	0.00132	0.00091	0.00068	0.00068	0.0005	-0.00069	0.00027	0.00038		379	0.00028	0.00047	0.00132	0.0028	0.00075	0.00164	0.00085	0.00017	-0.00051	-0.00065	0.00137	0.00017	0.0004	-0.00014	0.00151	0.00143	-0.00298		379	0.00012	-0.00126	0.00036	-0.00013	-0.00114	0.00214	0.00338	0.00286	0.00319	0.00282
	380	0.00093	-0.00097	0.00132	0.00012	-4e-05	0.00062	0.0012	0.00146	0.00093	0.00096	0.00122	0.0008	0.0008	-3e-05	0.0004	0.0002	0.00056		380	0.00026	0.0001	0.00127	0.00238	0.00036	0.00197	0.00113	0.00075	-0.00043	0.00058	0.00173	0.00042	0.00108	0.00011	0.00108	0.00036	-0.00203		380	0.00023	-0.00126	-0.0002	-0.00052	-0.00103	0.00162	0.00144	0.00273	0.00211	0.00284
	381	0.0017	-0.00035	0.00068	-0.00089	0.00135	0.00097	0.00061	0.00154	0.00088	0.0012	0.00121	-0.00108	-0.00108	-0.00072	0.00101	0.00069	-8e-05		381	0.00131	-0.00015	0.00115	0.00302	0.00116	0.00236	0.00054	0.00077	-0.00061	0.00019	0.00217	0.00065	0.00049	-3e-05	0.00102	0.00086	-0.00186		381	0.00135	-0.00017	-0.00085	-0.00066	0.00118	0.00142	0.00247	0.00199	0.00304	0.00277
	382	0.00065	-0.00093	0.00085	0.00048	-0.00028	0.00012	0.00181	0.00145	-0.00033	0.0005	0.00087	-0.00018	-0.00018	0.00063	-0.00023	0.00128	-0.00029		382	-0.00052	-0.00017	0.00155	0.00204	-0.00069	0.00141	0.00061	0.00058	-0.001	-0.00073	0.0006	0.00024	0.00049	0.00031	0.00091	0.00022	-0.00212		382	0.00101	-0.00075	0.0001	9e-05	0.00026	0.00083	0.00222	0.00078	0.00237	0.00295
	383	0.00124	0.00014	0.00135	0.00048	0.00138	0.00025	0.00056	0.00159	0.0009	0.00068	0.00146	0.00022	0.00022	0.00087	0.00058	-0.00049	0.00058		383	-0.00048	-0.00091	0.00115	0.00271	-0.00139	0.00117	0.00072	0.00041	-1e-05	1e-05	0.00177	0.00141	0.00132	-0.00045	0.00109	0.0011	-0.00177		383	-0.00016	0.0001	-0.00139	-0.00047	-6e-05	0.0016	0.00229	0.00226	0.00198	0.00177
	384	0.00084	-2e-05	0.00013	-0.00059	0.00082	0.0015	0.0008	0.00138	0.00026	0.00137	0.00114	0.00056	0.00056	-0.00058	0.00018	0.00122	0.00051		384	0.00062	0.00102	0.0013	0.00227	0.00164	0.00124	0.00156	0.00059	-0.00051	0.00056	0.00123	0.00082	0.00077	-1e-05	0.00131	0.00048	-0.00258		384	0.00018	-0.00026	-0.00037	4e-05	-8e-05	0.00194	0.00206	0.00128	0.00253	0.00207
	385	0.00075	-0.00015	0.00138	0.00085	0.0006	0.0008	0.00062	0.0012	0.00074	0.00086	0.00145	8e-05	8e-05	0.00038	-0.00074	-8e-05	0.00025		385	0.00067	0.00079	0.0013	0.00187	0.00146	0.00135	0.00063	0.00031	-0.00053	-0.00035	0.00094	0.00015	0.00111	-2e-05	0.00057	0.00064	-0.00181		385	-4e-05	-0.00049	0.00059	0.00061	-0.00053	0.00138	0.00138	0.00113	0.00109	0.00263
	386	0.00099	-0.0005	0.00033	-0.00067	0.00049	0.00057	-5e-05	0.00064	0.0005	0.00065	0.00085	0.00026	0.00026	-0.00076	0.0001	0.00039	0.00027		386	4e-05	-0.00066	0.00087	0.00232	-0.00062	0.00141	0.00131	0.00019	-0.00018	0.00053	0.00145	0.00082	0.00124	0.0001	0.00054	0.00034	-0.00176		386	0.00027	-0.00033	-0.00033	-0.00034	-6e-05	0.00152	0.00177	0.00144	0.00108	0.0019
	387	0.0001	-0.00097	-7e-05	-0.00058	-0.00087	0.00118	0.00106	0.00189	0.00135	0.00229	0.00124	0.00022	0.00022	0.00058	-0.00133	0.00043	-0.00012		387	0.0007	0.0012	0.00073	0.00213	0.0019	0.00178	0.00118	0.0002	-0.00029	0.00079	0.00127	0.00071	0.00108	0.00023	0.0007	0.00084	-0.00172		387	-0.00086	-0.00043	-0.00017	-0.00029	-0.00129	0.00187	0.00201	0.00182	0.00214	0.0024
	388	0.00101	0.00045	0.0004	-0.00125	0.00146	0.00022	0.0005	0.00102	-0.00022	0.00099	0.0003	5e-05	5e-05	-0.00095	-0.00083	0.00023	-1e-05		388	-8e-05	-0.00018	0.00111	0.00276	-0.00026	0.00201	0.00138	0.00087	0.00024	0.00097	0.00183	0.00074	0.00087	0.00046	0.00107	0.00041	-0.00206		388	0.00196	0.00024	-0.00024	-0.00031	0.0022	0.00056	0.00149	0.00102	0.00152	0.00191
	389	0.00093	5e-05	0.00021	-0.00053	0.00098	-0.0005	0.00059	0.00102	2e-05	0.00046	0.00053	1e-05	1e-05	0.0008	-0.00105	0.00065	0.00026		389	0.00137	0.00041	0.0011	0.00167	0.00178	0.00133	0.00079	0.00051	-0.0005	0.00036	0.00162	0.00046	0.00096	-5e-05	0.00131	0.00169	-0.00199		389	-9e-05	-0.0003	0.00048	-0.00013	-0.00039	0.00065	0.00085	0.00124	0.00083	0.0013
	390	0.001	-0.00075	0.00073	0.00065	0.00025	0.00101	0.00075	0.00158	0.00129	0.00095	0.00147	0.00015	0.00015	0.00102	-0.00018	0.00019	-6e-05		390	0.00071	-0.00032	0.00041	0.00172	0.00039	0.00139	0.00055	4e-05	-0.00048	0.00079	0.00143	0.00099	0.001	0.00015	0.00078	-0.0003	-0.00191		390	0.00028	-0.00045	0.00088	0.00047	-0.00017	0.00074	0.00142	0.00175	0.00077	0.00186
	391	0.00053	-0.00048	0.00016	0.00065	5e-05	0.00044	0.00047	0.00124	0.00065	0.00095	0.00112	-0.00019	-0.00019	3e-05	-0.00018	0.00084	0.00048		391	0.00027	0.00097	0.00108	0.00209	0.00124	0.00069	8e-05	0.0002	-0.00013	0.0007	0.00186	0.00095	0.00099	-0.00027	0.00126	0.001	-0.00165		391	0.00011	8e-05	-0.0004	-0.00059	0.00019	0.00065	0.00127	0.00189	0.00121	0.00165
	392	-0.0001	-0.00063	0.00029	-0.00106	-0.00073	0.00056	0.00049	0.00071	0.00047	0.00034	0.00059	0.00019	0.00019	-0.00026	-0.00097	0.00014	-0.0004		392	-2e-05	-0.00041	0.00107	0.00174	-0.00043	0.00105	0.00109	0.00099	-0.00031	0.00038	0.00103	0.00055	0.00108	1e-05	0.00012	0.00134	-0.00317		392	-0.00012	-0.00026	-0.0003	-0.00034	-0.00038	0.0003	0.00138	0.0009	0.00066	0.00139
	393	0.00055	-3e-05	-0.00015	-0.00077	0.00052	-0.00028	3e-05	0.00036	-1e-05	-2e-05	-0.00032	-0.00104	-0.00104	-0.00058	0.00058	0.00062	5e-05		393	-0.00037	-0.00012	0.00068	0.00188	-0.00049	-0.00016	0.00058	-0.00026	-0.00134	-0.00092	0.00066	-0.00051	0.00079	0.00037	0.00103	0.00137	-0.00176		393	0.00066	-0.00144	-0.00024	-5e-05	-0.00078	1e-05	0.00087	-0.0002	0	0.00062
	394	-0.00015	-0.00201	-0.00051	-0.00103	-0.00216	0.00044	0.00046	0.00078	0.00015	0.00038	0.00138	-0.00058	-0.00058	-0.0013	9e-05	0.00079	0.00049		394	-0.00029	-0.0005	0.00181	0.00302	-0.00079	0.00082	0.00043	0.00034	-0.00016	-0.00021	0.00167	0.00029	0.00075	0.00092	0.00099	0.00133	-0.00181		394	-0.00055	-0.00052	-0.0013	-0.00188	-0.00107	0.00068	0.00056	0.00085	0.00058	0.00062
	395	-0.00113	-0.00067	-0.00062	-0.00034	-0.0018	0.00092	9e-05	0.00087	0.0013	0.00032	0.00089	0.00018	0.00018	-0.00023	-0.0007	0.00021	0.00026		395	0.00078	-0.0001	0.00189	0.00195	0.00068	0.00098	0.00101	-1e-05	-0.00058	0.00027	0.00142	6e-05	0.00111	0.00027	0.00124	0.00035	-0.00349		395	-0.00036	-0.00059	9e-05	1e-05	-0.00095	0.00093	0.00099	0.00137	0.00094	0.00169
	396	-0.00041	-0.00038	-0.00016	-0.00031	-0.00079	0.00013	-0.0006	-0.00011	0.00053	-0.00043	-0.00044	-0.00031	-0.00031	-0.00015	0.00084	0.00034	-0.00064		396	0.00021	0.00023	0.00146	0.00189	0.00044	0.00181	0.00115	0.00215	0.00014	0.00038	0.00145	0.00067	0.00159	1e-05	0.00027	0.00138	-0.00142		396	-0.00022	-0.00069	-1e-05	-0.00085	-0.00091	-0.00014	0.00106	0.00057	0.00031	0.00109
	397	0.00091	-0.00012	-0.00024	-0.00066	0.00079	0.00012	-0.00045	-0.00108	-0.00099	-3e-05	-0.00042	-0.00142	-0.00142	-6e-05	0.00043	-0.00034	9e-05		397	-6e-05	-3e-05	0.0007	0.00238	-9e-05	0.00037	1e-05	0.00013	-0.00114	-0.00042	0.00061	8e-05	0.00082	-3e-05	0.00119	6e-05	-0.00163		397	0.00079	-0.00012	-0.00032	-0.00064	0.00067	-0.00016	-0.00013	-0.00047	-0.00053	-0.00029
	398	0.00034	0.00053	-0.00038	0.0008	0.00087	0.00115	0.00107	0.00052	0.00028	0.00041	0.00148	0.00022	0.00022	-0.00031	0.00114	-0.00011	-7e-05		398	-0.00116	-0.00036	0.00132	0.00204	-0.00152	0.00096	0.00033	0.00046	-0.00084	-0.00031	0.00083	0.00046	0.00015	-5e-05	0.00079	0.0007	-0.00082		398	0.0004	-0.00041	-0.00087	-0.00038	-1e-05	0.00035	0.00088	0.00118	-0.00046	0.00112
	399	0.00075	0.00056	-0.00067	-0.00015	0.00131	0.00094	-0.0005	-2e-05	-0.00035	4e-05	0.00031	-0.00122	-0.00122	-0.00039	-0.00093	-9e-05	0.00016		399	-1e-05	8e-05	0.00089	0.0019	7e-05	0.00041	0.00037	0.00041	-1e-05	-0.00029	0.00104	0.00038	0.00043	-8e-05	0.00068	4e-05	-0.0011		399	0.00063	0.00044	-0.0005	-0.00011	0.00107	-0.0007	0.00063	0.0007	-0.00096	0.00065
	400	-4e-05	-0.00023	-2e-05	-0.00015	-0.00027	3e-05	-0.0003	0.00024	-0.00023	-5e-05	-0.00052	-0.00106	-0.00106	-0.0001	-9e-05	-0.00081	-0.00019		400	-3e-05	-0.00025	0.00129	0.00212	-0.00028	0.00051	0.00074	-0.00014	-0.00033	-0.00076	0.00021	0.00045	0.00094	-0.00025	0.00063	0.00156	-0.00215		400	0.00015	-0.00013	0.0001	-0.00022	2e-05	0.00017	0.00034	-9e-05	-0.00096	0.00025
[truncated: 43 more columns]

## Sheet: Table S13
	Table S13. Raw data for DBP formation experiments of the reaction Cl/Cyt=1, pH7 (n=3) depicted in Figure 6A.
		DBP Concentration (µg/L)
		THMs			HANs	HAlds	HKTs
		TCM	TBM	BDCM	DCAN	TCAld	11DCP	111TCP	1133TeCP	13DCP
	Control 1 d	2.6 ± 0.8	0.08 ± 0.01	0.20 ± 0.01	n/a	0.58 ± 0.10	n.d.	0.026 ± 0.005	n.d.	n.d.
	Reaction Mixture 1 d	4.0 ± 2.5	0.02 ± 0.01	0.20 ± 0.01	0.6 ± 0.2	1.3 ± 0.3	0.31 ± 0.10	0.15 ± 0.04	n.d.	n.d.
	Reaction Mixture 2 d	6.0 ± 1.4	0.03 ± 0.01	0.30 ± 0.01	0.8 ± 0.1	1.4 ± 0.2	0.38 ± 0.03	0.14 ± 0.01	n.d.	n.d.
	Reaction Mixture 5 d	4.5 ± 0.7	0.04 ± 0.01	0.20 ± 0.02	0.9 ± 0.1	1.2 ± 0.1	0.36 ± 0.05	0.037 ± 0.004	n.d.	n.d.
	NH2Cl 1 d	1.6 ± 0.2	n.d.	0.020 ± 0.003	0.1 ± 0.0	n.d.	1.0 ± 0.0	n.d.	n.d.	0.1 ± 0.0
	NH2Cl 2 d	1.9 ± 0.6	n.d.	n.d.	0.2 ± 0.0	n.d.	1.0 ± 0.0	n.d.	n.d.	0.1 ± 0.0
	NH2Cl 5 d	2.0 ± 0.2	n.d.	0.030 ± 0.007	0.3 ± 0.0	n.d.	1.0 ± 0.0	n.d.	n.d.	0.1 ± 0.0
	HOCl 1 d	26 ± 1	0.6 ± 0.0	1.0 ± 0.0	0.8 ± 0.0	2.9 ± 0.2	0.44 ± 0.04	1.0 ± 0.02	0.2 ± 0.1	n.d.
	HOCl 2 d	34 ± 7	0.6 ± 0.0	1.4 ± 0.0	0.7 ± 0.0	2.3 ± 0.1	0.47 ± 0.06	0.83 ± 0.02	0.2 ± 0.0	n.d.
	HOCl 5 d	44 ± 6	0.06 ± 0.02	1.6 ± 0.1	0.7 ± 0.1	2.3 ± 0.1	0.46 ± 0.03	0.51 ± 0.01	0.05 ± 0.02	n.d.
	n.d. = not detected

## Sheet: Table S14-S16
	Table S14. Raw data for free and combined chlorine monitoring during DBP formation experiments of the reaction Cl/Cyt=1, pH7 (n=1) depicted in Figure S3B.
		Chlorine concentration (mg/L as Cl2)
	Time (days)	Free Chlorine	Combined Chlorine
	0	0.29	1.4
	1	0.021	1.2
	2	0.025	1.3
	5	0.034	1.1
	Table S15. Raw data for free and combined chlorine monitoring during DBP formation experiments of the monochloramine comparison reaction (n=1) depicted in Figure S3C.
		Chlorine concentration (mg/L as Cl2)
	Time (days)	Free Chlorine	Combined Chlorine
	0	0.36	0.81
	1	0.64	0.13
	2	0.5	0.21
	5	0.33	0.02
	Table S16. Raw data for free and combined chlorine monitoring during DBP formation experiments of the HOCl comparison reaction (n=1) depicted in Figure S3D.
		Chlorine concentration (mg/L as Cl2)
	Time (days)	Free Chlorine	Combined Chlorine
	0	1	0
	1	0.029	0.041
	2	0.02	0.03
	5	0.02	0.039

## Sheet: Table S17
	Table S17. Raw data for DBP formation experiments of the reaction Cl/Aden=1, pH7 (n=3) depicted in Figure 6B.
		DBP Concentration (µg/L)
		THMs		HANs	HAlds	HKTs
		TCM	BDCM	DCAN	TCAld	11DCP	111TCP	13DCP
	Control 1 d	0.68 ± 0.05	0.01 ± 0.01	n.d.	n.d.	n.d.	n.d.	n.d.
	Reaction Mixture 1 d	1.4 ± 0.4	0.07 ± 0.00	0.1 ± 0.0	0.1 ± 0.0	0.8 ± 0.1	0.02 ± 0.01	0.08 ± 0.03
	Reaction Mixture 2 d	1.6 ± 0.3	0.09 ± 0.01	0.1 ± 0.0	0.1 ± 0.0	0.7 ± 0.0	0.02 ± 0.00	0.03 ± 0.00
	Reaction Mixture 5 d	2.0 ± 0.1	0.08 ± 0.01	0.1 ± 0.0	0.1 ± 0.0	0.7 ± 0.1	n.d.	0.02 ± 0.00
	NH2Cl 1 d	1.4 ± 0.1	0.04 ± 0.01	0.02 ± 0.01	0.02 ± 0.01	0.8 ± 0.0	n.d.	0.07 ± 0.01
	NH2Cl 2 d	0.84 ± 0.20	0.05 ± 0.01	0.03 ± 0.00	0.02 ± 0.00	0.8 ± 0.0	n.d.	0.04 ± 0.00
	NH2Cl 5 d	0.43 ± 0.30	0.03 ± 0.00	0.009 ± 0.002	0.04 ± 0.02	0.4 ± 0.0	n.d.	0.03 ± 0.00
	n.d. = not detected

[truncated: 10 more sheets: Tables S18-S19, Table S20, Table S21, Table S22, Table S23, Table S24, Tables S25-S26, Table S27, Table S28, Tables S29-S30]
